# Supplementary material for: High-throughput screening of sediment bacterial communities from Oxygen Minimum Zones of the northern Indian Ocean
Source: Copernicus journal article supplement (doi:10.5194/bg-2019-330), 2019-08-29
Supplement: Supplementary file 1 [file bg-2019-330-supplement.pdf]

**A1: Bacterial taxa based on GreenGenes database****GS1A PS1B**

|                                                                                                                                       | GS1A          | PS1B         |
|---------------------------------------------------------------------------------------------------------------------------------------|---------------|--------------|
| <b>ABY1_OD1</b>                                                                                                                       | <b>0.1682</b> | <b>0.024</b> |
| Bacteria;ABY1_OD1;ABY1_OD1_unclassified                                                                                               | 1             | 0            |
| Bacteria;ABY1_OD1;FW129;FW129_unclassified                                                                                            | 4             | 0            |
| Bacteria;ABY1_OD1;FW129;KNA6-NB12;KNA6-NB12_unclassified                                                                              | 5             | 0            |
| Bacteria;ABY1_OD1;FW129;KNA6-NB29;KNA6-NB29_unclassified                                                                              | 0             | 1            |
| <b>Acidobacteria</b>                                                                                                                  | <b>0.7907</b> | <b>4.509</b> |
| Bacteria;Acidobacteria;Acidobacteria_unclassified                                                                                     | 4             | 31           |
| Bacteria;Acidobacteria;Acidobacteria-5;Acidobacteria-5_unclassified                                                                   | 0             | 1            |
| Bacteria;Acidobacteria;BPC015;BPC015_unclassified                                                                                     | 8             | 30           |
| Bacteria;Acidobacteria;BPC102;BPC102_unclassified                                                                                     | 9             | 43           |
| Bacteria;Acidobacteria;Chloracidobacteria;Ellin6075;Ellin6075_unclassified                                                            | 1             | 0            |
| Bacteria;Acidobacteria;iii1-15;Acidobacteria-6;RB40;RB40_unclassified                                                                 | 0             | 5            |
| Bacteria;Acidobacteria;iii1-15;iii1-15_unclassified                                                                                   | 1             | 8            |
| Bacteria;Acidobacteria;iii1-15;Riz6I;Unclassified                                                                                     | 0             | 1            |
| Bacteria;Acidobacteria;iii1-8;Unclassified                                                                                            | 0             | 2            |
| Bacteria;Acidobacteria;OS-K;OS-K_unclassified                                                                                         | 18            | 17           |
| Bacteria;Acidobacteria;RB25;RB25_unclassified                                                                                         | 6             | 47           |
| Bacteria;Acidobacteria;Solibacteres;Solibacteres_unclassified                                                                         | 0             | 1            |
| <b>Actinobacteria</b>                                                                                                                 | <b>2.1198</b> | <b>6.642</b> |
| Bacteria;Actinobacteria;Acidimicrobidae;Acidimicrobidae_unclassified                                                                  | 10            | 70           |
| Bacteria;Actinobacteria;Acidimicrobidae;CL500-29;ML316M-15;ML316M-15_unclassified                                                     | 0             | 3            |
| Bacteria;Actinobacteria;Acidimicrobidae;EB1017_group;Acidimicrobidae_bacterium_Ellin7143;Unclassified                                 | 6             | 1            |
| Bacteria;Actinobacteria;Acidimicrobidae;koll13;JTB31;BD2-10;BD2-10_unclassified                                                       | 1             | 5            |
| Bacteria;Actinobacteria;Acidimicrobidae;koll13;JTB31;Unclassified                                                                     | 16            | 37           |
| Bacteria;Actinobacteria;Acidimicrobidae;koll13;koll13_unclassified                                                                    | 81            | 25           |
| Bacteria;Actinobacteria;Acidimicrobidae;Microthrixineae;Microthrixineae_unclassified                                                  | 0             | 27           |
| Bacteria;Actinobacteria;Actinobacteridae;Arthrobacter;Unclassified                                                                    | 0             | 1            |
| Bacteria;Actinobacteria;Actinobacteridae;Frankineae;Frankineae_unclassified                                                           | 0             | 3            |
| Bacteria;Actinobacteria;Actinobacteridae;Gordoniaceae;Mycobacteriaceae;Mycobacteriaceae_unclassified                                  | 0             | 2            |
| Bacteria;Actinobacteria;Actinobacteridae;Micromonosporaceae;Micromonosporaceae_unclassified                                           | 0             | 2            |
| Bacteria;Actinobacteria;Actinobacteridae;Nocardiaceae;Nocardiaceae_unclassified                                                       | 0             | 2            |
| Bacteria;Actinobacteria;Actinobacteridae;Propionibacterineae;Propionibacterium;Propionibacteriaceae;Propionibacteriaceae_unclassified | 1             | 22           |
| Bacteria;Actinobacteria;Actinobacteridae;Propionibacterineae;Propionibacterium;Unclassified                                           | 1             | 2            |
| Bacteria;Actinobacteria;Actinobacteridae;Pseudonocardiaceae;Unclassified                                                              | 1             | 1            |
| Bacteria;Actinobacteria;Actinobacteridae;Streptomycineae;Streptomycineae_unclassified                                                 | 0             | 6            |
| Bacteria;Actinobacteria;Actinobacteridae;Streptosporangineae;Nonomuraea;Unclassified                                                  | 0             | 1            |
| Bacteria;Actinobacteria;Rubrobacteridae;MC47;Unclassified                                                                             | 4             | 6            |
| Bacteria;Actinobacteria;Rubrobacteridae;Rubrobacteridae_unclassified                                                                  | 2             | 20           |
| Bacteria;Actinobacteria;Rubrobacteridae;Thermolephilaceae;Thermolephilaceae_unclassified                                              | 2             | 15           |
| Bacteria;Actinobacteria;Rubrobacteridae;Unclassified                                                                                  | 1             | 1            |
| Bacteria;Actinobacteria;Unclassified                                                                                                  | 0             | 20           |
| Bacteria;Actinobacteria;WCHB1-81;At425_EubF1;At425_EubF1_unclassified                                                                 | 0             | 2            |
| <b>Bacteria_unclassified</b>                                                                                                          | <b>5.1144</b> | <b>8.873</b> |
| Bacteria;Bacteria_unclassified                                                                                                        | 304           | 366          |
| <b>Bacteroidetes</b>                                                                                                                  | <b>17.194</b> | <b>2.424</b> |
| Bacteria;Bacteroidetes;b-17BO;b-17BO_unclassified                                                                                     | 0             | 2            |
| Bacteria;Bacteroidetes;Bacteroidales;Hyd89-65;CFB_1;CFB_1_unclassified                                                                | 0             | 4            |
| Bacteria;Bacteroidetes;Bacteroidales;Unclassified                                                                                     | 0             | 4            |
| Bacteria;Bacteroidetes;Bacteroidetes_unclassified                                                                                     | 3             | 24           |
| Bacteria;Bacteroidetes;Crenotrichaceae;Crenotrichaceae_unclassified                                                                   | 0             | 3            |
| Bacteria;Bacteroidetes;Crenotrichaceae;Rhodothermus;Rhodothermus_unclassified                                                         | 0             | 3            |
| Bacteria;Bacteroidetes;Flavobacteriales;Cytophaga;Arctic_sea_ice_bacterium_ARK9985;Arctic_sea_ice_bacterium_ARK9985_unclassified      | 1007          | 0            |
| Bacteria;Bacteroidetes;Flavobacteriales;Cytophaga;Psychroserpens_burtonensis;Unclassified                                             | 2             | 4            |
| Bacteria;Bacteroidetes;Flavobacteriales;Cytophaga;Robiginitalea;bacterium_K2-15;bacterium_K2-15_unclassified                          | 0             | 5            |
| Bacteria;Bacteroidetes;Flavobacteriales;Flavobacteriales_unclassified                                                                 | 9             | 29           |
| Bacteria;Bacteroidetes;Flavobacteriales;LCP-72;LCP-72_unclassified                                                                    | 1             | 4            |
| Bacteria;Bacteroidetes;Saprospirales;Saprospiraceae;Saprospiraceae_unclassified                                                       | 0             | 18           |
| <b>Caldithrix_KSB1</b>                                                                                                                | <b>0.0841</b> | <b>0.073</b> |
| Bacteria;Caldithrix_KSB1;Caldithriales;Caldithriales_unclassified                                                                     | 5             | 3            |

|                                                                                                                                                                                                                                                           |               |              |
|-----------------------------------------------------------------------------------------------------------------------------------------------------------------------------------------------------------------------------------------------------------|---------------|--------------|
| <b>Chlorobi</b>                                                                                                                                                                                                                                           | <b>0.2355</b> | <b>0.097</b> |
| Bacteria;Chlorobi;Chlorobi_unclassified                                                                                                                                                                                                                   | 1             | 1            |
| Bacteria;Chlorobi;ZB1;ZB1_unclassified                                                                                                                                                                                                                    | 13            | 3            |
| <b>Chloroflexi</b>                                                                                                                                                                                                                                        | <b>4.9293</b> | <b>4.097</b> |
| Bacteria;Chloroflexi;Anaerolineae;Anaerolineae_unclassified                                                                                                                                                                                               | 121           | 36           |
| Bacteria;Chloroflexi;Anaerolineae;Anaerolineales;Anaerolineales_unclassified                                                                                                                                                                              | 46            | 46           |
| Bacteria;Chloroflexi;Anaerolineae;Anaerolineales;C1_B004;C1_B004_unclassified                                                                                                                                                                             | 1             | 0            |
| Bacteria;Chloroflexi;Anaerolineae;Anaerolineales;envOPS12;A30;H19;H19_unclassified                                                                                                                                                                        | 0             | 1            |
| Bacteria;Chloroflexi;Anaerolineae;Anaerolineales;GCA004;GCA004_unclassified                                                                                                                                                                               | 3             | 0            |
| Bacteria;Chloroflexi;Anaerolineae;Anaerolineales;SB-34;SB-34_unclassified                                                                                                                                                                                 | 38            | 10           |
| Bacteria;Chloroflexi;Anaerolineae;Caldilineaceae;Caldilineaceae_unclassified                                                                                                                                                                              | 0             | 18           |
| Bacteria;Chloroflexi;Anaerolineae;DRC31;Napoli-2B-44__BC07-2B-44;Napoli-2B-44__BC07-2B-44_unclassified                                                                                                                                                    | 0             | 2            |
| Bacteria;Chloroflexi;Anaerolineae;S0208;CCD21;CCD21_unclassified                                                                                                                                                                                          | 0             | 7            |
| Bacteria;Chloroflexi;Anaerolineae;SOGA31;SOGA31_unclassified                                                                                                                                                                                              | 1             | 42           |
| Bacteria;Chloroflexi;Dehalococcoidetes;Dehalococcoidetes_unclassified                                                                                                                                                                                     | 23            | 0            |
| Bacteria;Chloroflexi;Dehalococcoidetes;GIF9;MB-A2-101;Napoli-2B-07__BC07-2B-07;Napoli-2B-07__BC07-2B-07_unclassified                                                                                                                                      | 9             | 0            |
| Bacteria;Chloroflexi;Dehalococcoidetes;H14f;H14f_unclassified                                                                                                                                                                                             | 22            | 0            |
| Bacteria;Chloroflexi;Dehalococcoidetes;vadinBA26;vadinBA26_unclassified                                                                                                                                                                                   | 5             | 0            |
| Bacteria;Chloroflexi;Thermomicrobia;HN1-15;HN1-15_unclassified                                                                                                                                                                                            | 0             | 2            |
| Bacteria;Chloroflexi;TK17;TK17_unclassified                                                                                                                                                                                                               | 2             | 1            |
| Bacteria;Chloroflexi;Unclassified                                                                                                                                                                                                                         | 22            | 4            |
| <b>Cyanobacteria</b>                                                                                                                                                                                                                                      | <b>0.0168</b> | <b>1.673</b> |
| Bacteria;Cyanobacteria;PRD01a012B;PRD01a012B_unclassified                                                                                                                                                                                                 | 0             | 9            |
| Bacteria;Cyanobacteria;Prochlorococcus_marinus_MED4;Prochlorococcus_marinus_MED4_unclassified                                                                                                                                                             | 1             | 60           |
| <b>Firmicutes</b>                                                                                                                                                                                                                                         | <b>33.059</b> | <b>5.988</b> |
| Bacteria;Firmicutes;Acidaminococcaceae;Acidaminococcaceae_unclassified                                                                                                                                                                                    | 0             | 1            |
| Bacteria;Firmicutes;Bacilli;Ammoniphilus;Ammoniphilus_unclassified                                                                                                                                                                                        | 0             | 3            |
| Bacteria;Firmicutes;Bacilli;Bacilli_unclassified                                                                                                                                                                                                          | 233           | 68           |
| Bacteria;Firmicutes;Bacilli;Bacillus_agaradhaerens;Bacillus_agaradhaerens_unclassified                                                                                                                                                                    | 156           | 0            |
| Bacteria;Firmicutes;Bacilli;Bacillus_alcalophilus;Bacillus_alcalophilus_unclassified                                                                                                                                                                      | 131           | 0            |
| Bacteria;Firmicutes;Bacilli;Bacillus_cereus;Bacillus_cereus_unclassified                                                                                                                                                                                  | 2             | 1            |
| Bacteria;Firmicutes;Bacilli;Bacillus_funiculus;Bacillus_funiculus_unclassified                                                                                                                                                                            | 0             | 3            |
| Bacteria;Firmicutes;Bacilli;bacterium_str_47083;bacterium_str_47083_unclassified                                                                                                                                                                          | 0             | 2            |
| Bacteria;Firmicutes;Bacilli;glacial_ice_bacterium_SB100-9-5-1;glacial_ice_bacterium_SB100-9-5-1_unclassified;glacial_ice_bacterium_SB100-9-5-1_unclassified;glacial_ice_bacterium_SB100-9-5-1_unclassified;glacial_ice_bacterium_SB100-9-5-1_unclassified | 0             | 2            |
| Bacteria;Firmicutes;Bacilli;Halobacillus;Halobacillus_unclassified                                                                                                                                                                                        | 1             | 0            |
| Bacteria;Firmicutes;Bacilli;Lactobacillales;Aerococcaceae;Turicibacter;Turicibacter_sanguinis;NB1-n;NB1-n_unclassified                                                                                                                                    | 0             | 2            |
| Bacteria;Firmicutes;Bacilli;Lactobacillales;Streptococcaceae;Streptococcus;Unclassified                                                                                                                                                                   | 0             | 1            |
| Bacteria;Firmicutes;Bacilli;Marinococcus_halophilus;Bacillus_horikoshii;Unclassified                                                                                                                                                                      | 0             | 4            |
| Bacteria;Firmicutes;Bacilli;Paenibacillaceae;Cohnella;Cohnella_unclassified                                                                                                                                                                               | 0             | 1            |
| Bacteria;Firmicutes;Bacilli;Paenibacillaceae;Paenibacillus_alginolyticus;Paenibacillus_alginolyticus_unclassified                                                                                                                                         | 0             | 1            |
| Bacteria;Firmicutes;Bacilli;Paenibacillaceae;Unclassified                                                                                                                                                                                                 | 1             | 5            |
| Bacteria;Firmicutes;Bacilli;Planococcaceae;Planococcaceae_unclassified                                                                                                                                                                                    | 1432          | 1            |
| Bacteria;Firmicutes;Bacilli;Thermoactinomycetaceae;Unclassified                                                                                                                                                                                           | 0             | 1            |
| Bacteria;Firmicutes;Clostridia;Catabacter;Unclassified                                                                                                                                                                                                    | 0             | 1            |
| Bacteria;Firmicutes;Clostridia;Clostridia_unclassified                                                                                                                                                                                                    | 0             | 2            |
| Bacteria;Firmicutes;Clostridia;Clostridiales;Acetivibrio;Acetivibrio_unclassified                                                                                                                                                                         | 0             | 1            |
| Bacteria;Firmicutes;Clostridia;Clostridiales;Acetivibrio;Clostridium_cellulolyticum;Clostridium_cellulolyticum_unclassified                                                                                                                               | 0             | 7            |
| Bacteria;Firmicutes;Clostridia;Clostridiales;Clostridiaceae;Clostridiaceae_unclassified                                                                                                                                                                   | 0             | 33           |
| Bacteria;Firmicutes;Clostridia;Clostridiales;Clostridiaceae;Clostridium;Unclassified                                                                                                                                                                      | 0             | 20           |
| Bacteria;Firmicutes;Clostridia;Clostridiales;Clostridiaceae;Clostridium_novy;Clostridium_botulinum;Unclassified                                                                                                                                           | 0             | 1            |
| Bacteria;Firmicutes;Clostridia;Clostridiales;Clostridiales_unclassified                                                                                                                                                                                   | 2             | 20           |
| Bacteria;Firmicutes;Clostridia;Clostridiales;Coprococcus;Unclassified                                                                                                                                                                                     | 0             | 2            |
| Bacteria;Firmicutes;Clostridia;Clostridiales;Epulopiscium;Unclassified                                                                                                                                                                                    | 0             | 1            |
| Bacteria;Firmicutes;Clostridia;Clostridiales;U29-D06;Unclassified                                                                                                                                                                                         | 0             | 1            |
| Bacteria;Firmicutes;Clostridia;Peptostreptococcaceae;Peptostreptococcaceae_unclassified                                                                                                                                                                   | 3             | 5            |
| Bacteria;Firmicutes;Clostridia;Peptostreptococcaceae;Peptostreptococcus_anaerobius;Clostridium_bifermentans;Unclassified                                                                                                                                  | 1             | 30           |

|                                                                                                                                                                                |               |              |
|--------------------------------------------------------------------------------------------------------------------------------------------------------------------------------|---------------|--------------|
| Bacteria;Firmicutes;Desulfotomaculum;Desulfotomaculum_thermosapovorans;Desulfotomaculum_thermosapovorans_unclassified;Desulfotomaculum_thermosapovorans_unclassified           | 0             | 1            |
| Bacteria;Firmicutes;Desulfotomaculum;Desulfotomaculum_unclassified                                                                                                             | 0             | 1            |
| Bacteria;Firmicutes;Firmicutes_unclassified                                                                                                                                    | 3             | 19           |
| Bacteria;Firmicutes;Symbiobacteria;OPB54;BSV81;BSV81_unclassified                                                                                                              | 0             | 2            |
| Bacteria;Firmicutes;Symbiobacteria;OPB54;OPB54_unclassified                                                                                                                    | 0             | 1            |
| Bacteria;Firmicutes;Symbiobacteria;Symbiobacteriales;Symbiobacterium;Symbiobacterium_unclassified                                                                              | 0             | 1            |
| Bacteria;Firmicutes;Syntrophomonadaceae;Syntrophomonadaceae_unclassified                                                                                                       | 0             | 2            |
| <b>Fusobacteria</b>                                                                                                                                                            | <b>0</b>      | <b>0.048</b> |
| Bacteria;Fusobacteria;Fusobacteriaceae;Cetobacterium_somerae;Cetobacterium_somerae_unclassified                                                                                | 0             | 1            |
| Bacteria;Fusobacteria;Ilyobacter;Ilyobacter_unclassified                                                                                                                       | 0             | 1            |
| <b>Gemmatimonadetes</b>                                                                                                                                                        | <b>0.4374</b> | <b>1.188</b> |
| Bacteria;Gemmatimonadetes;Gemm-1b;Unclassified                                                                                                                                 | 17            | 0            |
| Bacteria;Gemmatimonadetes;Gemm-2;Gemm-2_unclassified                                                                                                                           | 0             | 8            |
| Bacteria;Gemmatimonadetes;Gemm_4;Gemm_4_unclassified                                                                                                                           | 3             | 30           |
| Bacteria;Gemmatimonadetes;Gemm-6;Gemm-6_unclassified                                                                                                                           | 3             | 2            |
| Bacteria;Gemmatimonadetes;Gemmatimonadetes_unclassified                                                                                                                        | 3             | 9            |
| <b>GN02</b>                                                                                                                                                                    | <b>0.0336</b> | <b>0.145</b> |
| Bacteria;GN02;GN02_unclassified                                                                                                                                                | 2             | 6            |
| <b>Nitrospirae</b>                                                                                                                                                             | <b>0.4038</b> | <b>1.188</b> |
| Bacteria;Nitrospirae;Nitrospirales;Nitrospiraceae;N_marina;Nitrospira_marina;Nitrospira_marina_unclassified                                                                    | 0             | 20           |
| Bacteria;Nitrospirae;Nitrospirales;Nitrospirales_unclassified                                                                                                                  | 0             | 10           |
| Bacteria;Nitrospirae;Thermodesulfovibrionales;Thermodesulfovibrionaceae;Unclassified                                                                                           | 24            | 19           |
| <b>NKB19</b>                                                                                                                                                                   | <b>0</b>      | <b>0.097</b> |
| Bacteria;NKB19;Unclassified                                                                                                                                                    | 0             | 4            |
| <b>OP3</b>                                                                                                                                                                     | <b>0.1178</b> | <b>0.024</b> |
| Bacteria;OP3;BD4-9;BD4-9_unclassified                                                                                                                                          | 3             | 1            |
| Bacteria;OP3;koll11;koll11_unclassified                                                                                                                                        | 1             | 0            |
| Bacteria;OP3;OP3_unclassified                                                                                                                                                  | 3             | 0            |
| <b>OP8</b>                                                                                                                                                                     | <b>0.858</b>  | <b>0.145</b> |
| Bacteria;OP8;OP8_1;HMMVPog-54;HMMVPog-54_unclassified                                                                                                                          | 33            | 4            |
| Bacteria;OP8;OP8_1;OP8_1_unclassified                                                                                                                                          | 18            | 1            |
| Bacteria;OP8;OP8_2;OP8_2_unclassified                                                                                                                                          | 0             | 1            |
| <b>OP9_JS1</b>                                                                                                                                                                 | <b>0.0505</b> | <b>0</b>     |
| Bacteria;OP9_JS1;JS1;JS1_unclassified                                                                                                                                          | 3             | 0            |
| <b>Planctomycetes</b>                                                                                                                                                          | <b>1.0767</b> | <b>8.63</b>  |
| Bacteria;Planctomycetes;agg27;agg27_unclassified                                                                                                                               | 0             | 2            |
| Bacteria;Planctomycetes;agg27;CL500-15;B83;B83_unclassified                                                                                                                    | 0             | 7            |
| Bacteria;Planctomycetes;agg27;OM190;ARKCH2Br2-76;ARKCH2Br2-76_unclassified                                                                                                     | 0             | 4            |
| Bacteria;Planctomycetes;Kueneniaceae;Scalindua;Scalindua_unclassified                                                                                                          | 0             | 1            |
| Bacteria;Planctomycetes;Planctomycetacia;DEL17;agg8;Unclassified                                                                                                               | 2             | 28           |
| Bacteria;Planctomycetes;Planctomycetacia;Pirellulales;Pirellulales_unclassified                                                                                                | 0             | 6            |
| Bacteria;Planctomycetes;Planctomycetacia;Planctomycetacia_unclassified                                                                                                         | 40            | 198          |
| Bacteria;Planctomycetes;Planctomycetacia;Planctomycetales;Unclassified                                                                                                         | 0             | 15           |
| Bacteria;Planctomycetes;Planctomycetacia;Rhodopirellulaceae;ARKDMS-83;ARKDMS-83_unclassified                                                                                   | 0             | 3            |
| Bacteria;Planctomycetes;Planctomycetacia;Rhodopirellulaceae;Unclassified                                                                                                       | 3             | 28           |
| Bacteria;Planctomycetes;Planctomycetes_unclassified                                                                                                                            | 3             | 5            |
| Bacteria;Planctomycetes;WPS-1;BD2-16;BD2-16_unclassified                                                                                                                       | 0             | 14           |
| Bacteria;Planctomycetes;WPS-1;BD2-16;MB-C2-105;MB-C2-105_unclassified                                                                                                          | 9             | 23           |
| Bacteria;Planctomycetes;WPS-1;CL500-3;CL120-56;Unclassified                                                                                                                    | 3             | 10           |
| Bacteria;Planctomycetes;WPS-1;WPS-1_unclassified                                                                                                                               | 4             | 12           |
| <b>Proteobacteria</b>                                                                                                                                                          | <b>32.436</b> | <b>52.51</b> |
| Bacteria;Proteobacteria;Alphaproteobacteria;Acetobacterales;Acetobacteraceae;Unclassified                                                                                      | 0             | 1            |
| Bacteria;Proteobacteria;Alphaproteobacteria;Alphaproteobacteria_unclassified                                                                                                   | 72            | 555          |
| Bacteria;Proteobacteria;Alphaproteobacteria;Bradyrhizobiales;Bradyrhizobiales_unclassified                                                                                     | 9             | 18           |
| Bacteria;Proteobacteria;Alphaproteobacteria;Bradyrhizobiales;Hyphomicrobiaceae2;Hyphomicrobiaceae2_unclassified                                                                | 52            | 11           |
| Bacteria;Proteobacteria;Alphaproteobacteria;Bradyrhizobiales;LO133;LO133_unclassified                                                                                          | 35            | 115          |
| Bacteria;Proteobacteria;Alphaproteobacteria;Bradyrhizobiales;Rhodoplanaceae;Unclassified                                                                                       | 0             | 1            |
| Bacteria;Proteobacteria;Alphaproteobacteria;Consistiales;Pelagibacter;SAR11;Candidatus_Pelagibacter;Candidatus_Pelagibacter_ubique;Candidatus_Pelagibacter_ubique_unclassified | 0             | 1            |
| Bacteria;Proteobacteria;Alphaproteobacteria;Defluvicoccus;Defluvicoccus_unclassified                                                                                           | 0             | 1            |
| Bacteria;Proteobacteria;Alphaproteobacteria;Nordella;Nordella_unclassified                                                                                                     | 0             | 1            |

|                                                                                                                                                            |     |     |
|------------------------------------------------------------------------------------------------------------------------------------------------------------|-----|-----|
| Bacteria;Proteobacteria;Alphaproteobacteria;PB21;PB21_unclassified                                                                                         | 0   | 1   |
| Bacteria;Proteobacteria;Alphaproteobacteria;Phyllobacteriaceae;Phyllobacteriaceae_unclassified                                                             | 0   | 4   |
| Bacteria;Proteobacteria;Alphaproteobacteria;Rhodobacterales;Rhodobacter;Rhodobacter_unclassified                                                           | 151 | 43  |
| Bacteria;Proteobacteria;Alphaproteobacteria;Rhodobacterales;Rhodobacter;Roseovarius;Roseovarius_unclassified                                               | 0   | 12  |
| Bacteria;Proteobacteria;Alphaproteobacteria;Rhodobacterales;Rhodobacter;Sulfitobacter;Sulfitobacter_unclassified                                           | 263 | 0   |
| Bacteria;Proteobacteria;Alphaproteobacteria;Rhodobacterales;Rhodobacterales_unclassified                                                                   | 0   | 11  |
| Bacteria;Proteobacteria;Alphaproteobacteria;Sphingomonadales;Porphyrobacter;Unclassified                                                                   | 0   | 6   |
| Bacteria;Proteobacteria;Alphaproteobacteria;Sphingomonadales;Unclassified                                                                                  | 0   | 1   |
| Bacteria;Proteobacteria;Deltaproteobacteria;Bacteriovorax;Bacteriovorax_unclassified                                                                       | 0   | 1   |
| Bacteria;Proteobacteria;Deltaproteobacteria;CTD005-82B-02;CTD005-82B-02_unclassified                                                                       | 0   | 1   |
| Bacteria;Proteobacteria;Deltaproteobacteria;Deltaproteobacteria_unclassified                                                                               | 27  | 31  |
| Bacteria;Proteobacteria;Deltaproteobacteria;Desulfobacteraceae;Desulfobacteraceae_unclassified                                                             | 47  | 63  |
| Bacteria;Proteobacteria;Deltaproteobacteria;Desulfobacterium_catecholicum;Desulfobacterium_catecholicum_unclassified                                       | 0   | 2   |
| Bacteria;Proteobacteria;Deltaproteobacteria;Desulfobacterium_catecholicum;Desulfobulbus_rhabdiformis;delta_proteobacterium_MLMS-1;BD1-2;BD1-2_unclassified | 3   | 12  |
| Bacteria;Proteobacteria;Deltaproteobacteria;Desulfobacterium_catecholicum;Desulfobulbus_rhabdiformis;Unclassified                                          | 1   | 25  |
| Bacteria;Proteobacteria;Deltaproteobacteria;EB1021;Unclassified                                                                                            | 3   | 8   |
| Bacteria;Proteobacteria;Deltaproteobacteria;Geobacter;Geobacter_unclassified                                                                               | 0   | 12  |
| Bacteria;Proteobacteria;Deltaproteobacteria;Geobacter;Pelobacter;Unclassified                                                                              | 0   | 8   |
| Bacteria;Proteobacteria;Deltaproteobacteria;Hyd89-23;Hyd89-23_unclassified                                                                                 | 40  | 49  |
| Bacteria;Proteobacteria;Deltaproteobacteria;MIZ46;CrystalBog021E5;CrystalBog021E5_unclassified                                                             | 0   | 1   |
| Bacteria;Proteobacteria;Deltaproteobacteria;MND4;MND4_unclassified                                                                                         | 4   | 8   |
| Bacteria;Proteobacteria;Deltaproteobacteria;Myxococcales;Polyangiaceae;Polyangium;Chondromyces_apiculatus;Z A3704c;Hyd24-27;Hyd24-27_unclassified          | 51  | 16  |
| Bacteria;Proteobacteria;Deltaproteobacteria;NB1-j;NB1-i;JTB38;JTB38_unclassified                                                                           | 0   | 2   |
| Bacteria;Proteobacteria;Deltaproteobacteria;NB1-j;NB1-i;NB1-i_unclassified                                                                                 | 33  | 71  |
| Bacteria;Proteobacteria;Deltaproteobacteria;NB1-j;NB1-j_unclassified                                                                                       | 5   | 17  |
| Bacteria;Proteobacteria;Deltaproteobacteria;Nitrospina;Nitrospina_unclassified                                                                             | 2   | 11  |
| Bacteria;Proteobacteria;Deltaproteobacteria;NKB15;NKB15_unclassified                                                                                       | 2   | 0   |
| Bacteria;Proteobacteria;Deltaproteobacteria;OPB16;ODP1230B1718;ODP1230B1718_unclassified                                                                   | 2   | 0   |
| Bacteria;Proteobacteria;Deltaproteobacteria;OPB16;Unclassified                                                                                             | 17  | 8   |
| Bacteria;Proteobacteria;Deltaproteobacteria;SHA-72;SHA-72_unclassified                                                                                     | 11  | 11  |
| Bacteria;Proteobacteria;Deltaproteobacteria;UA27;UA27_unclassified                                                                                         | 0   | 5   |
| Bacteria;Proteobacteria;Epsilonproteobacteria;Sulfurovumales;Sulfurovumaceae;Unclassified                                                                  | 0   | 2   |
| Bacteria;Proteobacteria;Epsilonproteobacteria;Sulfurovumales;Sulfurovumales_unclassified                                                                   | 0   | 8   |
| Bacteria;Proteobacteria;Gammaproteobacteria;Acidithiobacillales;Unclassified                                                                               | 3   | 7   |
| Bacteria;Proteobacteria;Gammaproteobacteria;AL-2A;AL-2A_unclassified                                                                                       | 0   | 10  |
| Bacteria;Proteobacteria;Gammaproteobacteria;Alcanivoracaceae;Alcanivoracaceae_unclassified                                                                 | 228 | 0   |
| Bacteria;Proteobacteria;Gammaproteobacteria;Alteromonadales;Unclassified                                                                                   | 0   | 34  |
| Bacteria;Proteobacteria;Gammaproteobacteria;Arctic96B-1;Gammaproteobacteria;Gammaproteobacteria_unclassified                                               | 0   | 1   |
| Bacteria;Proteobacteria;Gammaproteobacteria;B2M28;B2M28_unclassified                                                                                       | 0   | 14  |
| Bacteria;Proteobacteria;Gammaproteobacteria;BD1-1;BD1-1_unclassified                                                                                       | 0   | 42  |
| Bacteria;Proteobacteria;Gammaproteobacteria;BD7-8;BD7-8_unclassified                                                                                       | 6   | 2   |
| Bacteria;Proteobacteria;Gammaproteobacteria;Betaproteobacteria;Betaproteobacteria_unclassified                                                             | 0   | 5   |
| Bacteria;Proteobacteria;Gammaproteobacteria;Ferrimonadaceae;Unclassified                                                                                   | 0   | 1   |
| Bacteria;Proteobacteria;Gammaproteobacteria;Gammaproteobacteria_unclassified                                                                               | 674 | 775 |
| Bacteria;Proteobacteria;Gammaproteobacteria;Halomonadaceae;Halomonas;Halomonas_unclassified                                                                | 1   | 0   |
| Bacteria;Proteobacteria;Gammaproteobacteria;HTCC2089;obligately_oligotrophic_bacteria_KI89C;obligately_oligotrophic_bacteria_KI89C_unclassified            | 1   | 35  |
| Bacteria;Proteobacteria;Gammaproteobacteria;Legionellales;Legionella;Legionella_unclassified                                                               | 0   | 6   |
| Bacteria;Proteobacteria;Gammaproteobacteria;Legionellales;Unclassified                                                                                     | 0   | 4   |
| Bacteria;Proteobacteria;Gammaproteobacteria;Marinobacter;Marinobacter_hydrocarbonoclasticus;Marinobacter_hydrocarbonoclasticus_unclassified                | 3   | 0   |
| Bacteria;Proteobacteria;Gammaproteobacteria;Microbulbifer;Microbulbifer_unclassified                                                                       | 0   | 2   |
| Bacteria;Proteobacteria;Gammaproteobacteria;OM60;OM60_unclassified                                                                                         | 0   | 14  |
| Bacteria;Proteobacteria;Gammaproteobacteria;sulfur_oxidizing_symbionts;Unclassified                                                                        | 0   | 3   |
| Bacteria;Proteobacteria;Gammaproteobacteria;Vibrionaceae;Photobacterium;Photobacterium_unclassified                                                        | 160 | 0   |
| Bacteria;Proteobacteria;Gammaproteobacteria;Vibrionaceae;Vibrionaceae_unclassified                                                                         | 5   | 1   |
| Bacteria;Proteobacteria;Proteobacteria_unclassified                                                                                                        | 17  | 56  |

|                                                                              |               |              |
|------------------------------------------------------------------------------|---------------|--------------|
| Bacteria;Spirochaetes;Spirochaetales;Spirochaetaceae;Unclassified            | 1             | 0            |
| Bacteria;Spirochaetes;Spirochaetes_unclassified                              | 11            | 1            |
| <b>Thermi</b>                                                                | <b>0.0168</b> | <b>0.048</b> |
| Bacteria;Thermi;Deinococcales;Trueperaceae;Unclassified                      | 1             | 2            |
| <b>TM6</b>                                                                   | <b>0.1178</b> | <b>0.412</b> |
| Bacteria;TM6;TM6_unclassified;TM6                                            | 7             | 17           |
| <b>TM7</b>                                                                   | <b>0.0168</b> | <b>0.145</b> |
| Bacteria;TM7;TM7_unclassified                                                | 0             | 4            |
| Bacteria;TM7;TM7-1;TM7-1_unclassified                                        | 0             | 2            |
| Bacteria;TM7;TM7-3;CW040;CW040_unclassified                                  | 1             | 0            |
| <b>Verrucomicrobia</b>                                                       | <b>0.0336</b> | <b>0.145</b> |
| Bacteria;Verrucomicrobia;Opitutae;Opitutae_unclassified                      | 0             | 2            |
| Bacteria;Verrucomicrobia;Unclassified                                        | 1             | 3            |
| Bacteria;Verrucomicrobia;Verruco-5;Unclassified                              | 1             | 0            |
| Bacteria;Verrucomicrobia;Verrucomicrobiae;Rubromonas;Rubromonas_unclassified | 0             | 1            |
| <b>VHS-B5-50</b>                                                             | <b>0.0841</b> | <b>0.436</b> |
| Bacteria;VHS-B5-50;VHS-B5-50_unclassified                                    | 5             | 18           |
| <b>WS1</b>                                                                   | <b>0</b>      | <b>0.024</b> |
| Bacteria;WS1;WS1_unclassified                                                | 0             | 1            |
| <b>WS2</b>                                                                   | <b>0</b>      | <b>0.024</b> |
| Bacteria;WS2;WS2_unclassified                                                | 0             | 1            |
| <b>WS3</b>                                                                   | <b>0.3869</b> | <b>0.364</b> |
| Bacteria;WS3;Hyd24-12;Hyd24-12_unclassified                                  | 0             | 1            |
| Bacteria;WS3;Sediment-1;PRR-12;PRR-12_unclassified                           | 21            | 12           |
| Bacteria;WS3;Sediment-1;Sediment-1_unclassified                              | 2             | 2            |
| <b>ZB2</b>                                                                   | <b>0.0168</b> | <b>0</b>     |
| Bacteria;ZB2;BD5-13;Unclassified                                             | 1             | 0            |

| <b>A2: Taxonomy based on EzBiocloud database</b>                                                                              | <b>Name</b>      | <b>GS1A</b> | <b>PS1B</b> |
|-------------------------------------------------------------------------------------------------------------------------------|------------------|-------------|-------------|
| Bacteria;;;10BAV;;10BAV_c;;10BAV_o;;10BAV_f;;10BAV_f_uc;;10BAV_f_uc_s                                                         | 10BAV_f_uc_s     | 0.0337      | 0           |
| Bacteria;;;AB179666_p;;AB179666_c;;AB179666_c_uc;;AB179666_c_uc_f;;AB179666_c_uc_g;<br>AB179666_c_uc_s                        | AB179666_c_uc    | 0           | 0.024       |
| Bacteria;;;Acidobacteria;;Acidobacteria_uc;;Acidobacteria_uc_o;;Acidobacteria_uc_f;;Acidobacter<br>ia_uc_g;Acidobacteria_uc_s | Acidobacteria_uc | 0.0168      | 0           |
| Bacteria;;;Acidobacteria;;Chloracidobacterium_c;;Blastocatella_o;;Blastocatella_f;;Blastocatella;FJ<br>545571_s               | FJ545571_s       | 0.0168      | 0           |
| Bacteria;;;Acidobacteria;;DQ513087_c;;DQ513087_o;;DQ513087_f;;HQ445680_g;EU881312_s                                           | EU881312_s       | 0           | 0.024       |
| Bacteria;;;Acidobacteria;;EU686603_c;;EU686603_o;;EU686603_f;;EU686603_f_uc;;EU686603_<br>f_uc_s                              | EU686603_f_uc    | 0.0168      | 0.073       |
| Bacteria;;;Acidobacteria;;EU686603_c;;EU686603_o;;EU686603_f;;EU686603_g;EU686603_g_u<br>c                                    | EU686603_g_uc    | 0           | 0.097       |
| Bacteria;;;Acidobacteria;;EU686603_c;;EU686603_o;;EU686603_f;;EU686603_g;EU925897_s                                           | EU925897_s       | 0           | 0.024       |
| Bacteria;;;Acidobacteria;;EU686603_c;;EU686603_o;;EU686603_f;;EU686611_g;EU686611_g_u<br>c                                    | EU686611_g_uc    | 0           | 0.024       |
| Bacteria;;;Acidobacteria;;EU686603_c;;EU686603_o;;EU686603_f;;Z95727_g;Z95727_g_uc                                            | Z95727_g_uc      | 0           | 0.121       |
| Bacteria;;;Acidobacteria;;EU686603_c;;EU686603_o;;EU686603_o_uc;;EU686603_o_uc_g;EU6<br>86603_o_uc_s                          | EU686603_o_uc    | 0           | 0.024       |
| Bacteria;;;Acidobacteria;;EU686603_c;;EU686603_o;;HM445331_f;;HM445331_f_uc;HM44533<br>1_f_uc_s                               | HM445331_f_uc    | 0           | 0.048       |
| Bacteria;;;Acidobacteria;;EU686603_c;;EU686603_o;;HM445331_f;;HM445331_g;AY225640_s                                           | AY225640_s       | 0.0168      | 0.024       |
| Bacteria;;;Acidobacteria;;EU686603_c;;EU686603_o;;HM445331_f;;HM445331_g;EF125431_s                                           | EF125431_s       | 0           | 0.024       |
| Bacteria;;;Acidobacteria;;EU686603_c;;EU686603_o;;HM445331_f;;HM445331_g;EF999365_s                                           | EF999365_s       | 0           | 0.024       |
| Bacteria;;;Acidobacteria;;EU686603_c;;EU686603_o;;HM445331_f;;HM445331_g;HM445331_g<br>uc                                     | HM445331_g_uc    | 0           | 0.291       |
| Bacteria;;;Acidobacteria;;EU700145_c;;EU700145_o;;EU700145_f;;EU700145_f_uc;EU700145_<br>f_uc_s                               | EU700145_f_uc    | 0.0168      | 0.024       |
| Bacteria;;;Acidobacteria;;EU700145_c;;EU700145_o;;EU700145_f;;EU700145_g;DQ811917_s                                           | DQ811917_s       | 0           | 0.048       |
| Bacteria;;;Acidobacteria;;EU700145_c;;EU700145_o;;EU700145_f;;EU700145_g;EU048694_s                                           | EU048694_s       | 0           | 0.024       |
| Bacteria;;;Acidobacteria;;EU700145_c;;EU700145_o;;EU700145_f;;EU700145_g;EU491435_s                                           | EU491435_s       | 0           | 0.024       |
| Bacteria;;;Acidobacteria;;EU700145_c;;EU700145_o;;EU700145_f;;EU700145_g;EU700145_g_u<br>c                                    | EU700145_g_uc    | 0.1178      | 0.436       |
| Bacteria;;;Acidobacteria;;EU700145_c;;EU700145_o;;EU700145_f;;EU700145_g;EU700145_s                                           | EU700145_s       | 0           | 0.121       |
| Bacteria;;;Acidobacteria;;EU700145_c;;EU700145_o;;EU700145_f;;EU700145_g;JX391806_s                                           | JX391806_s       | 0           | 0.048       |
| Bacteria;;;Acidobacteria;;EU795203_c;;EU795203_o;;EU795203_f;;EU795203_f_uc;EU795203_<br>f_uc_s                               | EU795203_f_uc    | 0.0168      | 0.073       |
| Bacteria;;;Acidobacteria;;EU795203_c;;EU795203_o;;EU795203_f;;EU795203_g;4P005924_s                                           | 4P005924_s       | 0           | 0.024       |
| Bacteria;;;Acidobacteria;;EU795203_c;;EU795203_o;;EU795203_f;;EU795203_g;EU795203_g_u<br>c                                    | EU795203_g_uc    | 0           | 0.024       |
| Bacteria;;;Acidobacteria;;EU795203_c;;EU795203_o;;EU795203_f;;EU795203_g;JF344680_s                                           | JF344680_s       | 0.0168      | 0           |
| Bacteria;;;Acidobacteria;;EU795203_c;;EU795203_o;;EU795203_f;;EU795203_g;JN977149_s                                           | JN977149_s       | 0           | 0.024       |
| Bacteria;;;Acidobacteria;;EU795203_c;;EU795203_o;;EU795203_f;;EU925917_g;4P004051_s                                           | 4P004051_s       | 0           | 0.024       |
| Bacteria;;;Acidobacteria;;EU795203_c;;EU795203_o;;EU795203_f;;EU925917_g;EU700181_s                                           | EU700181_s       | 0           | 0.073       |
| Bacteria;;;Acidobacteria;;EU795203_c;;EU795203_o;;EU795203_f;;EU925917_g;EU925917_g_u<br>c                                    | EU925917_g_uc    | 0           | 0.048       |
| Bacteria;;;Acidobacteria;;HM243779_c;;AM997925_o;;AM997925_f;;AM997925_f_uc;AM9979<br>25_f_uc_s                               | AM997925_f_uc    | 0.0337      | 0.388       |

|                                                                                                                         |                 |        |       |
|-------------------------------------------------------------------------------------------------------------------------|-----------------|--------|-------|
| Bacteria;;;Acidobacteria;;HM243779_c;;AM997925_o;;AM997925_f;;EF125393_g;EF125393_g_uc                                  | EF125393_g_uc   | 0      | 0.097 |
| Bacteria;;;Acidobacteria;;HM243779_c;;AM997925_o;;AM997925_f;;EF125393_g;JN977257_s                                     | JN977257_s      | 0      | 0.073 |
| Bacteria;;;Acidobacteria;;HM243779_c;;AM997925_o;;AM997925_f;;EF125393_g;JQ612190_s                                     | JQ612190_s      | 0      | 0.024 |
| Bacteria;;;Acidobacteria;;HM243779_c;;AM997925_o;;AM997925_f;;EU373944_g;EU373944_s                                     | EU373944_s      | 0      | 0.024 |
| Bacteria;;;Acidobacteria;;HM243779_c;;AM997925_o;;AM997925_f;;EU373947_g;EU373947_g_uc                                  | EU373947_g_uc   | 0      | 0.048 |
| Bacteria;;;Acidobacteria;;HM243779_c;;AM997925_o;;AM997925_f;;EU373947_g;EU734964_s                                     | EU734964_s      | 0.0168 | 0     |
| Bacteria;;;Acidobacteria;;HM243779_c;;AM997925_o;;AM997925_f;;HQ190557_g;DQ395034_s                                     | DQ395034_s      | 0.0168 | 0     |
| Bacteria;;;Acidobacteria;;HM243779_c;;AM997925_o;;AM997925_f;;HQ190557_g;FJ545586_s                                     | FJ545586_s      | 0.0337 | 0     |
| Bacteria;;;Acidobacteria;;HM243779_c;;AM997925_o;;AM997925_f;;HQ190557_g;HQ190557_g_uc                                  | HQ190557_g_uc   | 0.0673 | 0.412 |
| Bacteria;;;Acidobacteria;;HM243779_c;;AM997925_o;;AM997925_o_uc;;AM997925_o_uc_g;AM997925_o_uc_s                        | AM997925_o_uc   | 0      | 0.024 |
| Bacteria;;;Acidobacteria;;HQ645210_c;;HQ645210_o;;HQ645210_f;;DQ829648_g;DQ829648_g_uc                                  | DQ829648_g_uc   | 0      | 0.048 |
| Bacteria;;;Acidobacteria;;HQ645210_c;;HQ645210_o;;HQ645210_o_uc;;HQ645210_o_uc_g;HQ645210_o_uc_s                        | HQ645210_o_uc   | 0      | 0.024 |
| Bacteria;;;Acidobacteria;;Solibacteres;;EU445199_o;;HM187196_f;;HM187196_f_uc;HM187196_f_uc_s                           | HM187196_f_uc   | 0.0168 | 0.024 |
| Bacteria;;;Acidobacteria;;Solibacteres;;Solibacterales;;EU652508_f;;EU652508_g;EU652508_g_uc                            | EU652508_g_uc   | 0      | 0.024 |
| Bacteria;;;Acidobacteria;;Thermoanaerobaculum_c;;Thermoanaerobaculum_o;;JF344531_f;;JF344531_f_uc;JF344531_f_uc_s       | JF344531_f_uc_s | 0.0168 | 0.315 |
| Bacteria;;;Acidobacteria;;Thermoanaerobaculum_c;;Thermoanaerobaculum_o;;JF344531_f;;JF344531_g;4P003941_s               | 4P003941_s      | 0      | 0.024 |
| Bacteria;;;Acidobacteria;;Thermoanaerobaculum_c;;Thermoanaerobaculum_o;;JF344531_f;;JF344531_g;4P005911_s               | 4P005911_s      | 0      | 0.048 |
| Bacteria;;;Acidobacteria;;Thermoanaerobaculum_c;;Thermoanaerobaculum_o;;JF344531_f;;JF344531_g;EF125450_s               | EF125450_s      | 0      | 0.145 |
| Bacteria;;;Acidobacteria;;Thermoanaerobaculum_c;;Thermoanaerobaculum_o;;JF344531_f;;JF344531_g;EU287099_s               | EU287099_s      | 0.0168 | 0     |
| Bacteria;;;Acidobacteria;;Thermoanaerobaculum_c;;Thermoanaerobaculum_o;;JF344531_f;;JF344531_g;EU287132_s               | EU287132_s      | 0      | 0.024 |
| Bacteria;;;Acidobacteria;;Thermoanaerobaculum_c;;Thermoanaerobaculum_o;;JF344531_f;;JF344531_g;EU617736_s               | EU617736_s      | 0.0505 | 0.048 |
| Bacteria;;;Acidobacteria;;Thermoanaerobaculum_c;;Thermoanaerobaculum_o;;JF344531_f;;JF344531_g;EU617737_s               | EU617737_s      | 0      | 0.073 |
| Bacteria;;;Acidobacteria;;Thermoanaerobaculum_c;;Thermoanaerobaculum_o;;JF344531_f;;JF344531_g;EU734994_s               | EU734994_s      | 0      | 0.073 |
| Bacteria;;;Acidobacteria;;Thermoanaerobaculum_c;;Thermoanaerobaculum_o;;JF344531_f;;JF344531_g;JF344531_g_uc            | JF344531_g_uc   | 0.0505 | 1.042 |
| Bacteria;;;Acidobacteria;;Thermoanaerobaculum_c;;Thermoanaerobaculum_o;;JF344531_f;;JF344531_g;JF344531_s               | JF344531_s      | 0.0168 | 0.024 |
| Bacteria;;;Acidobacteria;;Thermoanaerobaculum_c;;Thermoanaerobaculum_o;;JF344531_f;;JF344531_g;JX240993_s               | JX240993_s      | 0      | 0.218 |
| Bacteria;;;Acidobacteria;;Thermoanaerobaculum_c;;Thermoanaerobaculum_o;;JF344531_f;;JF344531_g;JX504264_s               | JX504264_s      | 0      | 0.024 |
| Bacteria;;;Acidobacteria;;Thermoanaerobaculum_c;;Thermoanaerobaculum_o;;Thermoanaerobaculum_f;;DQ395019_g;DQ395019_g_uc | DQ395019_g_uc   | 0.0673 | 0.145 |
| Bacteria;;;Acidobacteria;;Thermoanaerobaculum_c;;Thermoanaerobaculum_o;;Thermoanaerobaculum_f;;DQ395019_g;FJ455879_s    | FJ455879_s      | 0.0168 | 0     |
| Bacteria;;;Acidobacteria;;Thermoanaerobaculum_c;;Thermoanaerobaculum_o;;Thermoanaerobaculum_f;;DQ395019_g;JF344561_s    | JF344561_s      | 0.1346 | 0.194 |
| Bacteria;;;Acidobacteria;;Thermoanaerobaculum_c;;Thermoanaerobaculum_o;;Thermoanaerobaculum_f;;DQ395019_g;JX391686_s    | JX391686_s      | 0.0168 | 0     |

|                                                                                                                                                         |                  |        |       |
|---------------------------------------------------------------------------------------------------------------------------------------------------------|------------------|--------|-------|
| Bacteria;;;Acidobacteria;;Thermoanaerobaculum_c;;Thermoanaerobaculum_o;;Thermoanaerobaculum_f;;Thermoanaerobaculum_f_uc;Thermoanaerobaculum_f_uc_s      | Thermoanaerobac  | 0      | 0.097 |
| Bacteria;;;Acidobacteria;;Thermoanaerobaculum_c;;Thermoanaerobaculum_o;;Thermoanaerobaculum_o_uc;;Thermoanaerobaculum_o_uc_g;Thermoanaerobaculum_o_uc_s | Thermoanaerobac  | 0      | 0.073 |
| Bacteria;;;Acidobacteria;;Z95718_c;;Z95718_o;;DQ395349_f;;DQ395349_f_uc;DQ395349_f_uc_s                                                                 | DQ395349_f_uc    | 0.0168 | 0     |
| Bacteria;;;Acidobacteria;;Z95718_c;;Z95718_o;;DQ395349_f;;DQ395349_g;DQ395349_g_uc                                                                      | DQ395349_g_uc    | 0.0168 | 0     |
| Bacteria;;;Acidobacteria;;Z95718_c;;Z95718_o;;EU491886_f;;EU491886_f_uc;EU491886_f_uc_s                                                                 | EU491886_f_uc_s  | 0      | 0.097 |
| Bacteria;;;Acidobacteria;;Z95718_c;;Z95718_o;;EU491886_f;;GQ472805_g;GQ246376_s                                                                         | GQ246376_s       | 0      | 0.073 |
| Bacteria;;;Acidobacteria;;Z95718_c;;Z95718_o;;EU652505_f;;EU373925_g;EU373925_g_uc                                                                      | EU373925_g_uc    | 0      | 0.024 |
| Bacteria;;;Acidobacteria;;Z95718_c;;Z95718_o;;EU652505_f;;EU652505_f_uc;EU652505_f_uc_s                                                                 | EU652505_f_uc_s  | 0      | 0.073 |
| Bacteria;;;Acidobacteria;;Z95718_c;;Z95718_o;;EU652506_f;;EU652506_g;EU652506_s                                                                         | EU652506_s       | 0.0168 | 0     |
| Bacteria;;;Acidobacteria;;Z95718_c;;Z95718_o;;EU652507_f;;EU652507_f_uc;EU652507_f_uc_s                                                                 | EU652507_f_uc_s  | 0      | 0.048 |
| Bacteria;;;Acidobacteria;;Z95718_c;;Z95718_o;;EU652507_f;;EU652507_g;EU652507_g_uc                                                                      | EU652507_g_uc    | 0      | 0.048 |
| Bacteria;;;Acidobacteria;;Z95718_c;;Z95718_o;;Z95718_f;;Z95718_f_uc;Z95718_f_uc_s                                                                       | Z95718_f_uc_s    | 0.0505 | 0.63  |
| Bacteria;;;Acidobacteria;;Z95718_c;;Z95718_o;;Z95718_f;;Z95718_g;DQ351815_s                                                                             | DQ351815_s       | 0      | 0.024 |
| Bacteria;;;Acidobacteria;;Z95718_c;;Z95718_o;;Z95718_f;;Z95718_g;EU734973_s                                                                             | EU734973_s       | 0      | 0.024 |
| Bacteria;;;Acidobacteria;;Z95718_c;;Z95718_o;;Z95718_f;;Z95718_g;EU925891_s                                                                             | EU925891_s       | 0      | 0.073 |
| Bacteria;;;Acidobacteria;;Z95718_c;;Z95718_o;;Z95718_f;;Z95718_g;GQ246323_s                                                                             | GQ246323_s       | 0      | 0.024 |
| Bacteria;;;Acidobacteria;;Z95718_c;;Z95718_o;;Z95718_f;;Z95718_g;GU230435_s                                                                             | GU230435_s       | 0      | 0.024 |
| Bacteria;;;Acidobacteria;;Z95718_c;;Z95718_o;;Z95718_f;;Z95718_g;JN977337_s                                                                             | JN977337_s       | 0.0168 | 0     |
| Bacteria;;;Acidobacteria;;Z95718_c;;Z95718_o;;Z95718_f;;Z95718_g;Z95718_g_uc                                                                            | Z95718_g_uc      | 0.0337 | 0.364 |
| Bacteria;;;Acidobacteria;;Z95718_c;;Z95718_o;;Z95718_o_uc;;Z95718_o_uc_g;Z95718_o_uc_s                                                                  | Z95718_o_uc_s    | 0.0168 | 0.048 |
| Bacteria;;;Actinobacteria;;Acidimicrobiia;;Acidimicrobiales;;Acidimicrobiales_uc;;Acidimicrobiales_uc_g;Acidimicrobiales_uc_s                           | Acidimicrobiales | 0.0168 | 0     |
| Bacteria;;;Actinobacteria;;Acidimicrobiia;;Acidimicrobiales;;AM991247_f;;AM991247_f_uc;AM991247_f_uc_s                                                  | AM991247_f_uc    | 0.0168 | 0.267 |
| Bacteria;;;Actinobacteria;;Acidimicrobiia;;Acidimicrobiales;;AM991247_f;;AM991247_g;AM991247_g_uc                                                       | AM991247_g_uc    | 0.1009 | 0.048 |
| Bacteria;;;Actinobacteria;;Acidimicrobiia;;Acidimicrobiales;;AM991247_f;;AM991247_g;EU335429_s                                                          | EU335429_s       | 0      | 0.024 |
| Bacteria;;;Actinobacteria;;Acidimicrobiia;;Acidimicrobiales;;DQ395423_f;;DQ395423_g;DQ395423_g_uc                                                       | DQ395423_g_uc    | 0      | 0.024 |
| Bacteria;;;Actinobacteria;;Acidimicrobiia;;Acidimicrobiales;;DQ395423_f;;EU799666_g;GU118038_s                                                          | GU118038_s       | 0      | 0.024 |
| Bacteria;;;Actinobacteria;;Acidimicrobiia;;Acidimicrobiales;;DQ395502_f;;DQ395502_f_uc;DQ395502_f_uc_s                                                  | DQ395502_f_uc    | 0      | 0.048 |
| Bacteria;;;Actinobacteria;;Acidimicrobiia;;Acidimicrobiales;;DQ395502_f;;DQ395502_g;4P006054_s                                                          | 4P006054_s       | 0      | 0.388 |
| Bacteria;;;Actinobacteria;;Acidimicrobiia;;Acidimicrobiales;;DQ395502_f;;DQ395502_g;DQ395502_g_uc                                                       | DQ395502_g_uc    | 0      | 0.121 |
| Bacteria;;;Actinobacteria;;Acidimicrobiia;;Acidimicrobiales;;DQ395502_f;;FJ229917_g;EU374087_s                                                          | EU374087_s       | 0      | 0.024 |
| Bacteria;;;Actinobacteria;;Acidimicrobiia;;Acidimicrobiales;;DQ396300_f;;AJ241005_g;AJ241005_g_uc                                                       | AJ241005_g_uc    | 0      | 0.145 |
| Bacteria;;;Actinobacteria;;Acidimicrobiia;;Acidimicrobiales;;DQ396300_f;;DQ395467_g;DQ395467_g_uc                                                       | DQ395467_g_uc    | 0      | 0.073 |
| Bacteria;;;Actinobacteria;;Acidimicrobiia;;Acidimicrobiales;;DQ396300_f;;DQ395467_g;DQ395467_s                                                          | DQ395467_s       | 0      | 0.097 |
| Bacteria;;;Actinobacteria;;Acidimicrobiia;;Acidimicrobiales;;DQ396300_f;;DQ396300_f_uc;DQ396300_f_uc_s                                                  | DQ396300_f_uc    | 0      | 0.17  |
| Bacteria;;;Actinobacteria;;Acidimicrobiia;;Acidimicrobiales;;DQ396300_f;;EU491569_g;EU491569_g_uc                                                       | EU491569_g_uc    | 0      | 0.048 |
| Bacteria;;;Actinobacteria;;Acidimicrobiia;;Acidimicrobiales;;EF584530_f;;EF584530_f_uc;EF584530_f_uc_s                                                  | EF584530_f_uc_s  | 0      | 0.097 |



|                                                                                                                                               |                              |        |       |
|-----------------------------------------------------------------------------------------------------------------------------------------------|------------------------------|--------|-------|
| Bacteria;;;Actinobacteria;;;Acidimicrobiia;;;Acidimicrobiales;;;EU491192_f;;EU491192_f_uc;EU491192_f_uc_s                                     | EU491192_f_uc_s              | 0      | 0.048 |
| Bacteria;;;Actinobacteria;;;Acidimicrobiia;;;Acidimicrobiales;;;EU491192_f;;FJ229941_g;FJ229941_g_uc                                          | FJ229941_g_uc                | 0      | 0.073 |
| Bacteria;;;Actinobacteria;;;Acidimicrobiia;;;Acidimicrobiales;;;Iamiaceae;;EF632905_g;AM889149_s                                              | AM889149_s                   | 0      | 0.073 |
| Bacteria;;;Actinobacteria;;;Acidimicrobiia;;;Acidimicrobiales;;;Iamiaceae;;EF632905_g;EF632905_g_uc                                           | EF632905_g_uc                | 0      | 0.048 |
| Bacteria;;;Actinobacteria;;;Acidimicrobiia;;;Acidimicrobiales;;;Iamiaceae;;Iamiaceae_uc;Iamiaceae_uc_s                                        | Iamiaceae_uc_s               | 0      | 0.048 |
| Bacteria;;;Actinobacteria;;;Acidimicrobiia;;;Acidimicrobiales;;;Ilumatobacter_f;;Ilumatobacter;FJ358904_s                                     | FJ358904_s                   | 0      | 0.024 |
| Bacteria;;;Actinobacteria;;;Acidimicrobiia;;;Acidimicrobiales;;;Ilumatobacter_f;;Ilumatobacter;Ilumatobacter_uc                               | Ilumatobacter_uc             | 0      | 0.048 |
| Bacteria;;;Actinobacteria;;;Acidimicrobiia;;;Acidimicrobiales;;;Ilumatobacter_f;;Ilumatobacter_f_uc;Ilumatobacter_f_uc_s                      | Ilumatobacter_f_uc_s         | 0.0168 | 0     |
| Bacteria;;;Actinobacteria;;;Acidimicrobiia;;;Acidimicrobiales;;;Microthrix_f;;FN554394_g;EU488068_s                                           | EU488068_s                   | 0      | 0.194 |
| Bacteria;;;Actinobacteria;;;Acidimicrobiia;;;Acidimicrobiales;;;Microthrix_f;;FN554394_g;FN554394_g_uc                                        | FN554394_g_uc                | 0      | 0.097 |
| Bacteria;;;Actinobacteria;;;Acidimicrobiia;;;Acidimicrobiales;;;Microthrix_f;;Microthrix_f_uc;Microthrix_f_uc_s                               | Microthrix_f_uc_s            | 0      | 0.194 |
| Bacteria;;;Actinobacteria;;;Actinobacteria_c;;Actinobacteria_c_uc;;Actinobacteria_c_uc_f;;Actinobacteria_c_uc_g;Actinobacteria_c_uc_s         | Actinobacteria_c_uc_s        | 0.0168 | 0.024 |
| Bacteria;;;Actinobacteria;;;Actinobacteria_c;;Corynebacteriales;;;Mycobacteriaceae;;Mycobacterium;Mycobacterium insubricum                    | Mycobacterium insubricum     | 0      | 0.048 |
| Bacteria;;;Actinobacteria;;;Actinobacteria_c;;Corynebacteriales;;;Nocardiaceae;;Millsia;Millsia brevis                                        | Millsia brevis               | 0      | 0.024 |
| Bacteria;;;Actinobacteria;;;Actinobacteria_c;;Corynebacteriales;;;Nocardiaceae;;Nocardia;Nocardia niwae                                       | Nocardia niwae               | 0      | 0.048 |
| Bacteria;;;Actinobacteria;;;Actinobacteria_c;;Frankiales;;AB021325_f;;AB021325_f_uc;AB021325_f_uc_s                                           | AB021325_f_uc_s              | 0      | 0.048 |
| Bacteria;;;Actinobacteria;;;Actinobacteria_c;;Frankiales;;AB021325_f;;AB021325_g;AB021325_g_uc                                                | AB021325_g_uc                | 0      | 0.315 |
| Bacteria;;;Actinobacteria;;;Actinobacteria_c;;Frankiales;;AB021325_f;;AB021325_g;EF471577_s                                                   | EF471577_s                   | 0      | 0.048 |
| Bacteria;;;Actinobacteria;;;Actinobacteria_c;;Frankiales;;AB021325_f;;AB021325_g;FJ937869_s                                                   | FJ937869_s                   | 0      | 0.509 |
| Bacteria;;;Actinobacteria;;;Actinobacteria_c;;Frankiales;;Frankiaceae;;AY234742_g;4P002476_s                                                  | 4P002476_s                   | 0      | 0.024 |
| Bacteria;;;Actinobacteria;;;Actinobacteria_c;;Frankiales;;Frankiales_uc;;Frankiales_uc_g;Frankiales_uc_s                                      | Frankiales_uc_s              | 0      | 0.048 |
| Bacteria;;;Actinobacteria;;;Actinobacteria_c;;Frankiales;;Geodermatophilaceae;;Geodermatophilus;Geodermatophilus obscurus                     | Geodermatophilus obscurus    | 0      | 0.024 |
| Bacteria;;;Actinobacteria;;;Actinobacteria_c;;Frankiales;;Geodermatophilaceae;;Geodermatophilus;Geodermatophilus tzadiensis                   | Geodermatophilus tzadiensis  | 0      | 0.024 |
| Bacteria;;;Actinobacteria;;;Actinobacteria_c;;Micrococcales;;;Micrococcaceae;;Arthrobacter;Arthrobacter globiformis                           | Arthrobacter globiformis     | 0      | 0.024 |
| Bacteria;;;Actinobacteria;;;Actinobacteria_c;;Micromonosporales;;;Micromonosporaceae;;Micromonospora;Micromonospora haikouensis               | Micromonospora haikouensis   | 0      | 0.024 |
| Bacteria;;;Actinobacteria;;;Actinobacteria_c;;Micromonosporales;;;Micromonosporaceae;;Pseudosporangium;Pseudosporangium ferrugineum           | Pseudosporangium ferrugineum | 0      | 0.024 |
| Bacteria;;;Actinobacteria;;;Actinobacteria_c;;Propionibacteriales;;;Nocardioidaceae;;Nocardioides;Nocardioides panaciterrulae                 | Nocardioides panaciterrulae  | 0.0168 | 0     |
| Bacteria;;;Actinobacteria;;;Actinobacteria_c;;Propionibacteriales;;;Propionibacteriaceae;;Micrococcus;FJ478884_s                              | FJ478884_s                   | 0      | 0.024 |
| Bacteria;;;Actinobacteria;;;Actinobacteria_c;;Propionibacteriales;;;Propionibacteriaceae;;Propionibacterium;Propionibacterium acnes           | Propionibacterium acnes      | 0      | 0.024 |
| Bacteria;;;Actinobacteria;;;Actinobacteria_c;;Propionibacteriales;;;Propionibacteriales_uc;;Propionibacteriales_uc_g;Propionibacteriales_uc_s | Propionibacteriales_uc_s     | 0      | 0.024 |
| Bacteria;;;Actinobacteria;;;Actinobacteria_c;;Pseudonocardiales;;;Pseudonocardaceae;;Actinomycetospora;Actinomycetospora chlora               | Actinomycetospora chlora     | 0      | 0.024 |

|                                                                                                                                |                                |        |       |
|--------------------------------------------------------------------------------------------------------------------------------|--------------------------------|--------|-------|
| Bacteria;;;Actinobacteria;;Actinobacteria_c;;Streptomycetales;;Streptomycetaceae;;Streptomyces;Streptomyces curaco             | Streptomyces curaco            | 0      | 0.024 |
| Bacteria;;;Actinobacteria;;Actinobacteria_c;;Streptomycetales;;Streptomycetaceae;;Streptomyces;Streptomyces heilongjiangensis  | Streptomyces heilongjiangensis | 0      | 0.024 |
| Bacteria;;;Actinobacteria;;Actinobacteria_c;;Streptomycetales;;Streptomycetaceae;;Streptomyces;Streptomyces lannensis          | Streptomyces lannensis         | 0      | 0.024 |
| Bacteria;;;Actinobacteria;;Actinobacteria_c;;Streptomycetales;;Streptomycetaceae;;Streptomyces;Streptomyces stelliscabiei      | Streptomyces stelliscabiei     | 0      | 0.024 |
| Bacteria;;;Actinobacteria;;Actinobacteria_c;;Streptomycetales;;Streptomycetaceae;;Streptomyces;Streptomyces_uc                 | Streptomyces_uc                | 0      | 0.048 |
| Bacteria;;;Actinobacteria;;Actinobacteria_c;;Streptosporangiales;;Streptosporangiaceae;;Sphaerisporangium;Sphaerisporangium_uc | Sphaerisporangium_uc           | 0      | 0.024 |
| Bacteria;;;Actinobacteria;;Actinobacteria_c;;Streptosporangiales;;Thermomonosporaceae;;Actinallomurus;Actinallomurus_uc        | Actinallomurus_uc              | 0.0168 | 0     |
| Bacteria;;;Actinobacteria;;Coriobacteriia;;Coriobacteriales;;Coriobacteriaceae;;GQ396959_g;DQ521820_s                          | DQ521820_s                     | 0      | 0.024 |
| Bacteria;;;Actinobacteria;;Coriobacteriia;;Coriobacteriales;;Coriobacteriaceae;;GQ396959_g;GQ461691_s                          | GQ461691_s                     | 0      | 0.024 |
| Bacteria;;;Actinobacteria;;DQ513070_c;;DQ513070_o;;DQ513070_f;;DQ513070_f_uc;;DQ513070_o_f_uc_s                                | DQ513070_f_uc_s                | 0.0337 | 0     |
| Bacteria;;;Actinobacteria;;DQ513070_c;;DQ513070_o;;DQ513070_o_uc;;DQ513070_o_uc_g;;DQ513070_o_uc_s                             | DQ513070_o_uc_s                | 0.0168 | 0     |
| Bacteria;;;Actinobacteria;;DQ513070_c;;EU385864_o;;EU385864_f;;EU385864_f_uc;;EU385864_o_f_uc_s                                | EU385864_f_uc_s                | 0      | 0.024 |
| Bacteria;;;Actinobacteria;;DQ513070_c;;EU385864_o;;EU385864_f;;EU385864_g;;EU385864_g_uc                                       | EU385864_g_uc                  | 0.0168 | 0.097 |
| Bacteria;;;Actinobacteria;;DQ513070_c;;EU385864_o;;EU385864_o_uc;;EU385864_o_uc_g;;EU385864_o_uc_s                             | EU385864_o_uc_s                | 0.0168 | 0     |
| Bacteria;;;Actinobacteria;;EU374107_c;;EU374107_o;;EU374093_f;;EU374093_f_uc;;EU374093_o_f_uc_s                                | EU374093_f_uc_s                | 0.0168 | 0.121 |
| Bacteria;;;Actinobacteria;;EU374107_c;;EU374107_o;;EU374093_f;;EU374093_g;;AY592138_s                                          | AY592138_s                     | 0.0168 | 0     |
| Bacteria;;;Actinobacteria;;EU374107_c;;EU374107_o;;EU374093_f;;EU374093_g;;EU374089_s                                          | EU374089_s                     | 0      | 0.024 |
| Bacteria;;;Actinobacteria;;EU374107_c;;EU374107_o;;EU374093_f;;EU374093_g;;EU374093_g_uc                                       | EU374093_g_uc                  | 0.0673 | 0.436 |
| Bacteria;;;Actinobacteria;;EU374107_c;;EU374107_o;;EU374093_f;;EU374093_g;;HM598211_s                                          | HM598211_s                     | 0.0168 | 0.048 |
| Bacteria;;;Actinobacteria;;EU374107_c;;EU374107_o;;EU374107_f;;4P002712_g;;4P002712_g_uc                                       | 4P002712_g_uc                  | 0      | 0.024 |
| Bacteria;;;Actinobacteria;;EU374107_c;;EU374107_o;;EU374107_f;;DQ395394_g;;DQ395394_g_uc                                       | DQ395394_g_uc                  | 0.0168 | 0     |
| Bacteria;;;Actinobacteria;;EU374107_c;;EU374107_o;;EU374107_f;;DQ395394_g;;DQ395394_s                                          | DQ395394_s                     | 0.0505 | 0     |
| Bacteria;;;Actinobacteria;;EU374107_c;;EU374107_o;;EU374107_f;;EU374100_g;;EU374100_g_uc                                       | EU374100_g_uc                  | 0.0337 | 0     |
| Bacteria;;;Actinobacteria;;EU374107_c;;EU374107_o;;EU374107_f;;EU374100_g;;FJ624300_s                                          | FJ624300_s                     | 0.2524 | 0     |
| Bacteria;;;Actinobacteria;;EU374107_c;;EU374107_o;;EU374107_f;;EU374100_g;;JF344188_s                                          | JF344188_s                     | 0.1178 | 0     |
| Bacteria;;;Actinobacteria;;EU374107_c;;EU374107_o;;EU374107_f;;EU374107_f_uc;;EU374107_o_f_uc_s                                | EU374107_f_uc_s                | 0.1514 | 0.218 |
| Bacteria;;;Actinobacteria;;EU374107_c;;EU374107_o;;EU374107_f;;EU374107_g;;4P002687_s                                          | 4P002687_s                     | 0      | 0.145 |
| Bacteria;;;Actinobacteria;;EU374107_c;;EU374107_o;;EU374107_f;;EU374107_g;;DQ395050_s                                          | DQ395050_s                     | 0.0168 | 0.267 |
| Bacteria;;;Actinobacteria;;EU374107_c;;EU374107_o;;EU374107_f;;EU374107_g;;DQ395358_s                                          | DQ395358_s                     | 0      | 0.024 |
| Bacteria;;;Actinobacteria;;EU374107_c;;EU374107_o;;EU374107_f;;EU374107_g;;EU374107_g_uc                                       | EU374107_g_uc                  | 0.0673 | 0.267 |
| Bacteria;;;Actinobacteria;;EU374107_c;;EU374107_o;;EU374107_f;;EU374107_g;;EU374107_s                                          | EU374107_s                     | 0.0168 | 0     |

|                                                                                                                                 |                        |        |       |
|---------------------------------------------------------------------------------------------------------------------------------|------------------------|--------|-------|
| Bacteria;;;Actinobacteria;;EU374107_c;;EU374107_o;;EU374107_f;;EU374107_g;EU491057_s                                            | EU491057_s             | 0.0168 | 0     |
| Bacteria;;;Actinobacteria;;EU374107_c;;EU374107_o;;EU374107_f;;EU374107_g;FJ358902_s                                            | FJ358902_s             | 0      | 0.145 |
| Bacteria;;;Actinobacteria;;EU374107_c;;EU374107_o;;EU374107_f;;EU374107_g;FJ416072_s                                            | FJ416072_s             | 0      | 0.024 |
| Bacteria;;;Actinobacteria;;EU374107_c;;EU374107_o;;EU374107_f;;EU374107_g;GQ246409_s                                            | GQ246409_s             | 0.0505 | 0     |
| Bacteria;;;Actinobacteria;;EU374107_c;;EU374107_o;;EU374107_f;;EU374107_g;JF344148_s                                            | JF344148_s             | 0.0168 | 0.048 |
| Bacteria;;;Actinobacteria;;EU374107_c;;EU374107_o;;EU374107_f;;FJ712481_g;4P004824_s                                            | 4P004824_s             | 0      | 0.048 |
| Bacteria;;;Actinobacteria;;EU374107_c;;EU374107_o;;EU374107_f;;FJ712481_g;FJ545440_s                                            | FJ545440_s             | 0.0505 | 0.097 |
| Bacteria;;;Actinobacteria;;EU374107_c;;EU374107_o;;EU374107_f;;FJ712481_g;FJ712481_g_uc                                         | FJ712481_g_uc          | 0.1514 | 0.024 |
| Bacteria;;;Actinobacteria;;EU374107_c;;EU374107_o;;EU374107_f;;FJ712481_g;FJ712481_s                                            | FJ712481_s             | 0      | 0.024 |
| Bacteria;;;Actinobacteria;;EU374107_c;;EU374107_o;;EU374107_f;;FJ712481_g;GQ246337_s                                            | GQ246337_s             | 0.6898 | 0     |
| Bacteria;;;Actinobacteria;;EU374107_c;;EU374107_o;;EU374107_o_uc;;EU374107_o_uc_g;EU374107_o_uc_s                               | EU374107_o_uc          | 0.0337 | 0     |
| Bacteria;;;Actinobacteria;;FJ478799_c;;FJ478799_o;;FJ478799_f;;FJ478799_g;4P006019_s                                            | 4P006019_s             | 0      | 0.024 |
| Bacteria;;;Actinobacteria;;OPB41;;EU385697_o;;EU385697_f;;DQ394962_g;DQ394972_s                                                 | DQ394972_s             | 0      | 0.048 |
| Bacteria;;;Actinobacteria;;OPB41;;OPB41_o;;OPB41_f;;OPB41_f_uc;OPB41_f_uc_s                                                     | OPB41_f_uc_s           | 0.0168 | 0     |
| Bacteria;;;Actinobacteria;;Rubrobacteria;;AB240334_o;;AB240334_f;;AB240334_f_uc;AB240334_f_uc_s                                 | AB240334_f_uc_s        | 0      | 0.048 |
| Bacteria;;;Actinobacteria;;Rubrobacteria;;AB240334_o;;AB240334_f;;AB240334_g;AB240334_g_uc                                      | AB240334_g_uc          | 0.0168 | 0     |
| Bacteria;;;Actinobacteria;;Rubrobacteria;;AB240334_o;;AB240334_f;;AB240334_g;DQ890440_s                                         | DQ890440_s             | 0      | 0.218 |
| Bacteria;;;Actinobacteria;;Rubrobacteria;;AB240334_o;;AB240334_f;;AB240334_g;EU804030_s                                         | EU804030_s             | 0      | 0.218 |
| Bacteria;;;Actinobacteria;;Rubrobacteria;;AB240334_o;;EU266877_f;;EU266877_f_uc;EU266877_f_uc_s                                 | EU266877_f_uc_s        | 0      | 0.024 |
| Bacteria;;;Actinobacteria;;Rubrobacteria;;AB240334_o;;EU266877_f;;EU266877_g;EU266877_g_uc                                      | EU266877_g_uc          | 0      | 0.073 |
| Bacteria;;;Actinobacteria;;Rubrobacteria;;AB240334_o;;EU266877_f;;EU266877_g;EU266877_s                                         | EU266877_s             | 0      | 0.024 |
| Bacteria;;;Actinobacteria;;Rubrobacteria;;AB240334_o;;EU407208_f;;EU407208_g;EU407208_g_uc                                      | EU407208_g_uc          | 0      | 0.048 |
| Bacteria;;;Actinobacteria;;Rubrobacteria;;Gaiellales;;Gaiellaceae;;Gaiella;EF516701_s                                           | EF516701_s             | 0      | 0.024 |
| Bacteria;;;Actinobacteria;;Rubrobacteria;;Gaiellales;;Gaiellaceae;;Gaiella;EU491301_s                                           | EU491301_s             | 0      | 0.073 |
| Bacteria;;;Actinobacteria;;Rubrobacteria;;Gaiellales;;Gaiellaceae;;Gaiella;EU491469_s                                           | EU491469_s             | 0.0337 | 0     |
| Bacteria;;;Actinobacteria;;Rubrobacteria;;Gaiellales;;Gaiellaceae;;Gaiella;Gaiella_uc                                           | Gaiella_uc             | 0      | 0.024 |
| Bacteria;;;Actinobacteria;;Rubrobacteria;;Gaiellales;;Gaiellaceae;;Gaiellaceae_uc;Gaiellaceae_uc_s                              | Gaiellaceae_uc_s       | 0.0337 | 0.048 |
| Bacteria;;;Actinobacteria;;Rubrobacteria;;Gaiellales;;Gaiellales_uc;;Gaiellales_uc_g;Gaiellales_uc_s                            | Gaiellales_uc_s        | 0      | 0.024 |
| Bacteria;;;Actinobacteria;;Rubrobacteria;;Rubrobacteriales;;Rubrobacteraceae;;Rubrobacter;HQ397199_s                            | HQ397199_s             | 0      | 0.024 |
| Bacteria;;;Actinobacteria;;Thermoleophilia;;Solirubrobacterales;;AB630582_f;;AB630582_f_uc;AB630582_f_uc_s                      | AB630582_f_uc_s        | 0.0337 | 0.121 |
| Bacteria;;;Actinobacteria;;Thermoleophilia;;Solirubrobacterales;;AB630582_f;;AB630582_g;AB630582_g_uc                           | AB630582_g_uc          | 0.0168 | 0.194 |
| Bacteria;;;Actinobacteria;;Thermoleophilia;;Solirubrobacterales;;Conexibacteraceae;;Conexibacteraceae_uc;Conexibacteraceae_uc_s | Conexibacteraceae_uc_s | 0      | 0.024 |
| Bacteria;;;Actinobacteria;;Thermoleophilia;;Solirubrobacterales;;EU289467_f;;EU289467_f_uc;EU289467_f_uc_s                      | EU289467_f_uc_s        | 0      | 0.048 |
| Bacteria;;;Armatimonadetes;;EU385871_c;;EU385871_o;;EU385871_f;;EU385871_f_uc;EU385871_f_uc_s                                   | EU385871_f_uc_s        | 0.0168 | 0     |
| Bacteria;;;Armatimonadetes;;Fimbriimonadia;;Fimbriimonadales;;Fimbriimonadaceae;;Fimbriimonadaceae_uc;Fimbriimonadaceae_uc_s    | Fimbriimonadaceae_uc_s | 0      | 0.073 |

|                                                                                                                           |                             |        |       |
|---------------------------------------------------------------------------------------------------------------------------|-----------------------------|--------|-------|
| Bacteria;;;AY345499_p;;AY345499_c;;AY345499_o;;AY345499_o_uc;;AY345499_o_uc_g;AY345499_o_uc_s                             | AY345499_o_uc               | 0      | 0.024 |
| Bacteria;;;Bacteria_uc;;Bacteria_uc_c;;Bacteria_uc_o;;Bacteria_uc_f;;Bacteria_uc_g;Bacteria_uc_s                          | Bacteria_uc_s               | 0.0505 | 0.024 |
| Bacteria;;;Bacteroidetes;;Bacteroidia;;Bacteroidales;;FJ437992_f;;FJ437992_f_uc;FJ437992_f_uc_s                           | FJ437992_f_uc_s             | 0      | 0.121 |
| Bacteria;;;Bacteroidetes;;Bacteroidia;;Bacteroidales;;FJ437992_f;;GQ356975_g;DQ395033_s                                   | DQ395033_s                  | 0      | 0.024 |
| Bacteria;;;Bacteroidetes;;Bacteroidia;;Bacteroidales;;GQ357022_f;;EU487965_g;EU487965_g_uc                                | EU487965_g_uc               | 0.0168 | 0     |
| Bacteria;;;Bacteroidetes;;Bacteroidia;;Bacteroidales;;GQ357022_f;;GQ357022_f_uc;GQ357022_f_uc_s                           | GQ357022_f_uc               | 0      | 0.024 |
| Bacteria;;;Bacteroidetes;;Bacteroidia;;Bacteroidales;;GQ357022_f;;GQ357022_g;FJ264575_s                                   | FJ264575_s                  | 0      | 0.073 |
| Bacteria;;;Bacteroidetes;;Bacteroidia;;Bacteroidales;;GQ357022_f;;GQ357022_g;JF344511_s                                   | JF344511_s                  | 0      | 0.024 |
| Bacteria;;;Bacteroidetes;;Bacteroidia;;Bacteroidales;;GU454901_f;;EU488084_g;EU488084_g_uc                                | EU488084_g_uc               | 0.0168 | 0     |
| Bacteria;;;Bacteroidetes;;Bacteroidia;;Bacteroidales;;Marinilabiliaceae;;Marinifilum;Marinifilum_uc                       | Marinifilum_uc              | 0      | 0.121 |
| Bacteria;;;Bacteroidetes;;Bacteroidia;;Bacteroidales;;Marinilabiliaceae;;Marinilabiliaceae_uc;Marinilabiliaceae_uc_s      | Marinilabiliaceae_uc        | 0      | 0.048 |
| Bacteria;;;Bacteroidetes;;Bacteroidia;;Bacteroidales;;Marinilabiliaceae;;Saccharicrinis;Saccharicrinis_uc                 | Saccharicrinis_uc           | 0      | 0.024 |
| Bacteria;;;Bacteroidetes;;Bacteroidia;;Bacteroidales;;Prolixibacteraceae;;Prolixibacteraceae_uc;Prolixibacteraceae_uc_s   | Prolixibacteraceae_uc       | 0      | 0.024 |
| Bacteria;;;Bacteroidetes;;Cytophagia;;Cytophagales;;DQ395367_f;;DQ395367_g;DQ395367_g_uc                                  | DQ395367_g_uc               | 0      | 0.048 |
| Bacteria;;;Bacteroidetes;;Cytophagia;;Cytophagales;;DQ395367_f;;DQ395367_g;DQ431893_s                                     | DQ431893_s                  | 0      | 0.121 |
| Bacteria;;;Bacteroidetes;;Cytophagia;;Cytophagales;;DQ395367_f;;DQ395367_g;EU652657_s                                     | EU652657_s                  | 0      | 0.024 |
| Bacteria;;;Bacteroidetes;;Cytophagia;;Cytophagales;;EU804292_f;;EU804292_f_uc;EU804292_f_uc_s                             | EU804292_f_uc_s             | 0.0168 | 0     |
| Bacteria;;;Bacteroidetes;;Cytophagia;;Cytophagales;;GQ246379_f;;DQ395064_g;AB530240_s                                     | AB530240_s                  | 0      | 0.048 |
| Bacteria;;;Bacteroidetes;;Flavobacteria;;Flavobacteriales;;Brumimicrobiaceae;;Brumimicrobiaceae_uc;Brumimicrobiaceae_uc_s | Brumimicrobiaceae_uc        | 0.0168 | 0.073 |
| Bacteria;;;Bacteroidetes;;Flavobacteria;;Flavobacteriales;;Brumimicrobiaceae;;Fluviicola;Fluviicola_uc                    | Fluviicola_uc               | 0      | 0.024 |
| Bacteria;;;Bacteroidetes;;Flavobacteria;;Flavobacteriales;;Brumimicrobiaceae;;Salinirepens;4P004610_s                     | 4P004610_s                  | 0      | 0.024 |
| Bacteria;;;Bacteroidetes;;Flavobacteria;;Flavobacteriales;;Cryomorphaceae;;Cryomorphaceae_uc;Cryomorphaceae_uc_s          | Cryomorphaceae_uc           | 0      | 0.024 |
| Bacteria;;;Bacteroidetes;;Flavobacteria;;Flavobacteriales;;Flavobacteriaceae;;Actibacter;Actibacter_sediminis             | Actibacter_sediminis        | 0      | 0.048 |
| Bacteria;;;Bacteroidetes;;Flavobacteria;;Flavobacteriales;;Flavobacteriaceae;;AJ567549_g;AJ567549_g_uc                    | AJ567549_g_uc               | 0      | 0.024 |
| Bacteria;;;Bacteroidetes;;Flavobacteria;;Flavobacteriales;;Flavobacteriaceae;;AM110988_g;4P002731_s                       | 4P002731_s                  | 0      | 0.048 |
| Bacteria;;;Bacteroidetes;;Flavobacteria;;Flavobacteriales;;Flavobacteriaceae;;AM110988_g;AM110988_g_uc                    | AM110988_g_uc               | 0.0168 | 0.048 |
| Bacteria;;;Bacteroidetes;;Flavobacteria;;Flavobacteriales;;Flavobacteriaceae;;Flavobacteriaceae_uc;Flavobacteriaceae_uc_s | Flavobacteriaceae_uc        | 0.1346 | 0.194 |
| Bacteria;;;Bacteroidetes;;Flavobacteria;;Flavobacteriales;;Flavobacteriaceae;;Lutibacter;Lutibacter_flavus                | Lutibacter_flavus           | 0.0168 | 0     |
| Bacteria;;;Bacteroidetes;;Flavobacteria;;Flavobacteriales;;Flavobacteriaceae;;Lutibacter;Lutibacter_uc                    | Lutibacter_uc               | 0.0168 | 0.073 |
| Bacteria;;;Bacteroidetes;;Flavobacteria;;Flavobacteriales;;Flavobacteriaceae;;Lutimonas;Lutimonas_vermicola               | Lutimonas_vermicola         | 0      | 0.073 |
| Bacteria;;;Bacteroidetes;;Flavobacteria;;Flavobacteriales;;Flavobacteriaceae;;Robiginitalea;DQ395008_s                    | DQ395008_s                  | 0      | 0.121 |
| Bacteria;;;Bacteroidetes;;Flavobacteria;;Flavobacteriales;;Flavobacteriaceae;;Salegentibacter;JX240567_s                  | JX240567_s                  | 1.5141 | 0     |
| Bacteria;;;Bacteroidetes;;Flavobacteria;;Flavobacteriales;;Flavobacteriaceae;;Salegentibacter;Salegentibacter_mishustinae | Salegentibacter_mishustinae | 15.293 | 0     |
| Bacteria;;;Bacteroidetes;;Flavobacteria;;Flavobacteriales;;Flavobacteriaceae;;Salegentibacter;Salegentibacter_uc          | Salegentibacter_uc          | 0.1346 | 0     |

|                                                                                                                                       |                    |        |       |
|---------------------------------------------------------------------------------------------------------------------------------------|--------------------|--------|-------|
| Bacteria;;;Bacteroidetes;;Flavobacteria;;Flavobacteriales;;Flavobacteriaceae;;Zeaxanthinibacter;4P002669_s                            | 4P002669_s         | 0      | 0.048 |
| Bacteria;;;Bacteroidetes;;Flavobacteria;;Flavobacteriales;;Flavobacteriaceae;;Zeaxanthinibacter;Zeaxanthinibacter_uc                  | Zeaxanthinibacter  | 0      | 0.145 |
| Bacteria;;;Bacteroidetes;;Rhodothermus_c;;Rhodothermus_o;;AB015524_f;;4P002653_g;4P002653_g_uc                                        | 4P002653_g_uc      | 0      | 0.097 |
| Bacteria;;;Bacteroidetes;;Rhodothermus_c;;Rhodothermus_o;;AB015524_f;;AB015524_f_uc;AB015524_f_uc_s                                   | AB015524_f_uc_s    | 0      | 0.073 |
| Bacteria;;;Bacteroidetes;;Rhodothermus_c;;Rhodothermus_o;;EU488070_f;;EU488070_f_uc;EU488070_f_uc_s                                   | EU488070_f_uc_s    | 0      | 0.024 |
| Bacteria;;;Bacteroidetes;;Sphingobacteria;;HQ178786_o;;FN811185_f;;FN811185_f_uc;FN811185_f_uc_s                                      | FN811185_f_uc_s    | 0      | 0.048 |
| Bacteria;;;Bacteroidetes;;Sphingobacteria;;Sphingobacteriales;;Saprospiraceae;;AB476288_g;AB476288_g_uc                               | AB476288_g_uc      | 0      | 0.073 |
| Bacteria;;;Bacteroidetes;;Sphingobacteria;;Sphingobacteriales;;Saprospiraceae;;FJ155027_g;FJ155027_s                                  | FJ155027_s         | 0      | 0.073 |
| Bacteria;;;Bacteroidetes;;Sphingobacteria;;Sphingobacteriales;;Saprospiraceae;;Saprospiraceae_uc;Saprospiraceae_uc_s                  | Saprospiraceae_uc  | 0      | 0.291 |
| Bacteria;;;Bacteroidetes;;Sphingobacteria;;Sphingobacteriales;;Sphingobacteriales_uc;;Sphingobacteriales_uc_g;Sphingobacteriales_uc_s | Sphingobacteriales | 0      | 0.048 |
| Bacteria;;;BRC1;;EU246057_c;;EU246057_o;;EU246057_o_uc;;EU246057_o_uc_g;EU246057_o_uc_s                                               | EU246057_o_uc_s    | 0      | 0.024 |
| Bacteria;;;BRC1;;FP245541_c;;FP245541_o;;EU385897_f;;EU385897_g;EU385897_g_uc                                                         | EU385897_g_uc      | 0      | 0.024 |
| Bacteria;;;BRC1;;FP245541_c;;FP245541_o;;EU925842_f;;EU925842_f_uc;EU925842_f_uc_s                                                    | EU925842_f_uc_s    | 0.0168 | 0     |
| Bacteria;;;BRC1;;FP245541_c;;FP245541_o;;FP245541_f;;FP245541_f_uc;FP245541_f_uc_s                                                    | FP245541_f_uc_s    | 0      | 0.024 |
| Bacteria;;;BRC1;;FP245541_c;;FP245541_o;;FP245541_o_uc;;FP245541_o_uc_g;FP245541_o_uc_s                                               | FP245541_o_uc_s    | 0      | 0.024 |
| Bacteria;;;BRC1;;FP245541_c;;JN501450_o;;JN501450_o_uc;;JN501450_o_uc_g;JN501450_o_uc_s                                               | JN501450_o_uc_s    | 0      | 0.024 |
| Bacteria;;;Caldithrix_p;;Caldithrix_c;;Caldithrix_o;;Caldithrix_f;;AB530234_g;4P001585_s                                              | 4P001585_s         | 0      | 0.024 |
| Bacteria;;;Caldithrix_p;;Caldithrix_c;;Caldithrix_o;;Caldithrix_f;;AB530234_g;AB530234_g_uc                                           | AB530234_g_uc      | 0.0168 | 0.024 |
| Bacteria;;;Caldithrix_p;;Caldithrix_c;;Caldithrix_o;;Caldithrix_f;;AB530234_g;EU592472_s                                              | EU592472_s         | 0.0168 | 0     |
| Bacteria;;;Caldithrix_p;;Caldithrix_c;;Caldithrix_o;;Caldithrix_f;;Caldithrix_f_uc;Caldithrix_f_uc_s                                  | Caldithrix_f_uc_s  | 0.0673 | 0.024 |
| Bacteria;;;Caldithrix_p;;Caldithrix_c;;Caldithrix_o;;Caldithrix_f;;DQ811935_g;EU487880_s                                              | EU487880_s         | 0.0168 | 0     |
| Bacteria;;;Caldithrix_p;;Caldithrix_c;;EU245241_o;;EU245241_o_uc;;EU245241_o_uc_g;EU245241_o_uc_s                                     | EU245241_o_uc_s    | 0      | 0.048 |
| Bacteria;;;Chlorobi;;Ignavibacteriae;;Ignavibacteriales;;GQ472436_f;;GQ472436_f_uc;GQ472436_f_uc_s                                    | GQ472436_f_uc_s    | 0      | 0.024 |
| Bacteria;;;Chlorobi;;Ignavibacteriae;;Ignavibacteriales;;Ignavibacteriaceae;;AB530235_g;JQ579954_s                                    | JQ579954_s         | 0      | 0.097 |
| Bacteria;;;Chlorobi;;Ignavibacteriae;;Ignavibacteriales;;Ignavibacteriaceae;;Ignavibacteriaceae_uc;Ignavibacteriaceae_uc_s            | Ignavibacteriaceae | 0.0505 | 0     |
| Bacteria;;;Chlorobi;;Ignavibacteriae;;Ignavibacteriales;;Ignavibacteriaceae;;Ignavibacterium;FJ416082_s                               | FJ416082_s         | 0.1851 | 0     |
| Bacteria;;;Chlorobi;;Ignavibacteriae;;Ignavibacteriales;;Ignavibacteriaceae;;Ignavibacterium;Ignavibacterium_uc                       | Ignavibacterium_u  | 0.0168 | 0.073 |
| Bacteria;;;Chlorobi;;Ignavibacteriae;;Ignavibacteriales;;Ignavibacteriaceae;;Ignavibacterium;JQ580230_s                               | JQ580230_s         | 0.0168 | 0     |
| Bacteria;;;Chlorobi;;Ignavibacteriae;;Ignavibacteriales;;JF428856_f;;JF428856_g;JF428856_s                                            | JF428856_s         | 0.0168 | 0.073 |
| Bacteria;;;Chloroflexi;;Anaerolineae;;AF234733_o;;FJ481317_f;;FJ481317_f_uc;FJ481317_f_uc_s                                           | FJ481317_f_uc_s    | 0      | 0.024 |
| Bacteria;;;Chloroflexi;;Anaerolineae;;Anaerolinaeles;;AM745150_f;;AM745150_f_uc;AM745150_f_uc_s                                       | AM745150_f_uc_s    | 0.2187 | 0.17  |
| Bacteria;;;Chloroflexi;;Anaerolineae;;Anaerolinaeles;;AM745150_f;;AM745150_g;AM745150_g_uc                                            | AM745150_g_uc      | 0.0337 | 0.121 |
| Bacteria;;;Chloroflexi;;Anaerolineae;;Anaerolinaeles;;AM745150_f;;AM745150_g;AM745150_s                                               | AM745150_s         | 0.0841 | 0     |
| Bacteria;;;Chloroflexi;;Anaerolineae;;Anaerolinaeles;;AM745150_f;;AM745150_g;GQ472825_s                                               | GQ472825_s         | 0.0168 | 0     |

|                                                                                                             |                   |        |       |
|-------------------------------------------------------------------------------------------------------------|-------------------|--------|-------|
| Bacteria;;Chloroflexi;;Anaerolineae;;Anaerolinales;;AM745150_f;;AM745150_g;JN977248_s                       | JN977248_s        | 0.0168 | 0     |
| Bacteria;;Chloroflexi;;Anaerolineae;;Anaerolinales;;AM745150_f;;AM745166_g;FJ264746_s                       | FJ264746_s        | 0.0337 | 0     |
| Bacteria;;Chloroflexi;;Anaerolineae;;Anaerolinales;;AM745150_f;;AM745166_g;GQ246423_s                       | GQ246423_s        | 0      | 0.024 |
| Bacteria;;Chloroflexi;;Anaerolineae;;Anaerolinales;;AM745150_f;;AM745166_g;GQ356984_s                       | GQ356984_s        | 0      | 0.048 |
| Bacteria;;Chloroflexi;;Anaerolineae;;Anaerolinales;;AM745150_f;;DQ811856_g;4P000759_s                       | 4P000759_s        | 0.3365 | 0     |
| Bacteria;;Chloroflexi;;Anaerolineae;;Anaerolinales;;AM745150_f;;DQ811856_g;DQ811856_g_uc                    | DQ811856_g_uc     | 0.4206 | 0.194 |
| Bacteria;;Chloroflexi;;Anaerolineae;;Anaerolinales;;AM745150_f;;DQ811856_g;EF061969_s                       | EF061969_s        | 0.1009 | 0.121 |
| Bacteria;;Chloroflexi;;Anaerolineae;;Anaerolinales;;AM745150_f;;DQ811856_g;JN977295_s                       | JN977295_s        | 0.1346 | 0.121 |
| Bacteria;;Chloroflexi;;Anaerolineae;;Anaerolinales;;AM745150_f;;DQ811858_g;DQ811858_s                       | DQ811858_s        | 0.0337 | 0.097 |
| Bacteria;;Chloroflexi;;Anaerolineae;;Anaerolinales;;Anaerolinaceae;;Anaerolinaceae_uc;Anaerolinaceae_uc_s   | Anaerolinaceae_uc | 0.0168 | 0.048 |
| Bacteria;;Chloroflexi;;Anaerolineae;;Anaerolinales;;Anaerolinaceae;;GQ500701_g;FJ517050_s                   | FJ517050_s        | 0      | 0.024 |
| Bacteria;;Chloroflexi;;Anaerolineae;;Anaerolinales;;Anaerolinaceae;;Pelolinea;AF419689_s                    | AF419689_s        | 0.0168 | 0     |
| Bacteria;;Chloroflexi;;Anaerolineae;;Anaerolinales;;Anaerolinales_uc;;Anaerolinales_uc_g;Anaerolinales_uc_s | Anaerolinales_uc  | 0.0168 | 0     |
| Bacteria;;Chloroflexi;;Anaerolineae;;Anaerolinales;;DQ394948_f;;DQ394948_f_uc;DQ394948_f_uc_s               | DQ394948_f_uc     | 0.0168 | 0     |
| Bacteria;;Chloroflexi;;Anaerolineae;;Anaerolinales;;FJ455877_f;;EU266881_g;JX240956_s                       | JX240956_s        | 0.0168 | 0     |
| Bacteria;;Chloroflexi;;Anaerolineae;;Anaerolinales;;FJ455877_f;;FJ455877_f_uc;FJ455877_f_uc_s               | FJ455877_f_uc_s   | 0.0841 | 0.024 |
| Bacteria;;Chloroflexi;;Anaerolineae;;Anaerolinales;;FJ455877_f;;FJ455877_g;AB015556_s                       | AB015556_s        | 0.3197 | 0     |
| Bacteria;;Chloroflexi;;Anaerolineae;;Anaerolinales;;FJ455877_f;;FJ455877_g;AM745142_s                       | AM745142_s        | 0.0337 | 0.024 |
| Bacteria;;Chloroflexi;;Anaerolineae;;Anaerolinales;;FJ455877_f;;FJ455877_g;DQ811872_s                       | DQ811872_s        | 0      | 0.024 |
| Bacteria;;Chloroflexi;;Anaerolineae;;Anaerolinales;;FJ455877_f;;FJ455877_g;EU487891_s                       | EU487891_s        | 0.0168 | 0     |
| Bacteria;;Chloroflexi;;Anaerolineae;;Anaerolinales;;FJ455877_f;;FJ455877_g;EU488086_s                       | EU488086_s        | 0.1009 | 0     |
| Bacteria;;Chloroflexi;;Anaerolineae;;Anaerolinales;;FJ455877_f;;FJ455877_g;EU617894_s                       | EU617894_s        | 0      | 0.048 |
| Bacteria;;Chloroflexi;;Anaerolineae;;Anaerolinales;;FJ455877_f;;FJ455877_g;FJ455877_g_uc                    | FJ455877_g_uc     | 0.3197 | 0.17  |
| Bacteria;;Chloroflexi;;Anaerolineae;;Anaerolinales;;FJ455877_f;;FJ455877_g;FJ873372_s                       | FJ873372_s        | 0.1682 | 0     |
| Bacteria;;Chloroflexi;;Anaerolineae;;Anaerolinales;;FJ455877_f;;FJ455877_g;JN977165_s                       | JN977165_s        | 0      | 0.048 |
| Bacteria;;Chloroflexi;;Anaerolineae;;Anaerolinales;;FJ455877_f;;FJ455877_g;JN977207_s                       | JN977207_s        | 0.1682 | 0     |
| Bacteria;;Chloroflexi;;Anaerolineae;;Anaerolinales;;FJ455877_f;;FJ455877_g;JX504347_s                       | JX504347_s        | 0.0337 | 0     |
| Bacteria;;Chloroflexi;;Anaerolineae;;Anaerolinales;;FJ455877_f;;FJ455877_g;JX504511_s                       | JX504511_s        | 0      | 0.024 |
| Bacteria;;Chloroflexi;;Anaerolineae;;Anaerolinales;;FJ455877_f;;FJ455877_g;KC010011_s                       | KC010011_s        | 0      | 0.024 |
| Bacteria;;Chloroflexi;;Anaerolineae;;Anaerolinales;;GU455152_f;;FN820298_g;4P003627_s                       | 4P003627_s        | 0      | 0.024 |
| Bacteria;;Chloroflexi;;Anaerolineae;;Anaerolinales;;GU455152_f;;FN820298_g;DQ395058_s                       | DQ395058_s        | 0.0505 | 0.315 |
| Bacteria;;Chloroflexi;;Anaerolineae;;Anaerolinales;;GU455152_f;;FN820298_g;DQ811863_s                       | DQ811863_s        | 0      | 0.024 |
| Bacteria;;Chloroflexi;;Anaerolineae;;Anaerolinales;;GU455152_f;;FN820298_g;EF125394_s                       | EF125394_s        | 0      | 0.024 |
| Bacteria;;Chloroflexi;;Anaerolineae;;Anaerolinales;;GU455152_f;;FN820298_g;FJ813520_s                       | FJ813520_s        | 0.0505 | 0     |
| Bacteria;;Chloroflexi;;Anaerolineae;;Anaerolinales;;GU455152_f;;FN820298_g;FN820298_g_uc                    | FN820298_g_uc     | 0.0337 | 0.048 |
| Bacteria;;Chloroflexi;;Anaerolineae;;Anaerolinales;;GU455152_f;;FN820298_g;FN820298_s                       | FN820298_s        | 0.0168 | 0     |
| Bacteria;;Chloroflexi;;Anaerolineae;;Anaerolinales;;GU455152_f;;FN820298_g;GQ246385_s                       | GQ246385_s        | 0      | 0.024 |
| Bacteria;;Chloroflexi;;Anaerolineae;;AY704393_o;;AY869684_f;;AY869684_f_uc;AY869684_f_uc_s                  | AY869684_f_uc     | 0.0168 | 0     |
| Bacteria;;Chloroflexi;;Anaerolineae;;AY704393_o;;AY869684_f;;AY869684_g;AY869684_g_uc                       | AY869684_g_uc     | 0.0168 | 0     |
| Bacteria;;Chloroflexi;;Anaerolineae;;EU245204_o;;EU245204_f;;EU245204_f_uc;EU245204_f_uc_s                  | EU245204_f_uc_s   | 0.0337 | 0.024 |
| Bacteria;;Chloroflexi;;Anaerolineae;;EU245204_o;;EU245204_f;;EU245228_g;EU245228_g_uc                       | EU245228_g_uc     | 0      | 0.024 |
| Bacteria;;Chloroflexi;;Anaerolineae;;FJ517056_o;;FJ517056_f;;EF061968_g;AB300071_s                          | AB300071_s        | 0      | 0.024 |

|                                                                                                                                  |                         |        |       |
|----------------------------------------------------------------------------------------------------------------------------------|-------------------------|--------|-------|
| Bacteria;;Chloroflexi;;Anaerolineae;;FJ517056_o;;FJ517056_f;;EF061968_g;EF061968_g_uc                                            | EF061968_g_uc           | 0.0168 | 0.097 |
| Bacteria;;Chloroflexi;;Anaerolineae;;FJ517056_o;;FJ517056_f;;EF061968_g;EF061968_s                                               | EF061968_s              | 0      | 0.024 |
| Bacteria;;Chloroflexi;;Anaerolineae;;FJ517056_o;;FJ517056_f;;EF061968_g;EU488293_s                                               | EU488293_s              | 0.0168 | 0.073 |
| Bacteria;;Chloroflexi;;Anaerolineae;;FJ517056_o;;FJ517056_f;;FJ517056_f_uc;FJ517056_f_uc_s                                       | FJ517056_f_uc_s         | 0      | 0.17  |
| Bacteria;;Chloroflexi;;Anaerolineae;;FJ517056_o;;FJ517056_f;;FJ517056_g;FJ517056_g_uc                                            | FJ517056_g_uc           | 0      | 0.024 |
| Bacteria;;Chloroflexi;;Anaerolineae;;FJ517056_o;;FJ517056_f;;FJ517056_g;FJ748793_s                                               | FJ748793_s              | 0      | 0.048 |
| Bacteria;;Chloroflexi;;Caldilineae;;Caldilineales;;AB300116_f;;AB300116_f_uc;AB300116_f_uc_s                                     | AB300116_f_uc_s         | 0.0673 | 0     |
| Bacteria;;Chloroflexi;;Caldilineae;;Caldilineales;;AB300116_f;;AB300116_g;AB300116_g_uc                                          | AB300116_g_uc           | 0.1009 | 0     |
| Bacteria;;Chloroflexi;;Caldilineae;;Caldilineales;;AF419668_f;;AF419668_f_uc;AF419668_f_uc_s                                     | AF419668_f_uc_s         | 0.0168 | 0     |
| Bacteria;;Chloroflexi;;Caldilineae;;Caldilineales;;AF419668_f;;AF419668_g;AF419668_g_uc                                          | AF419668_g_uc           | 0.0168 | 0.024 |
| Bacteria;;Chloroflexi;;Caldilineae;;Caldilineales;;AY548939_f;;AY548939_f_uc;AY548939_f_uc_s                                     | AY548939_f_uc_s         | 0      | 0.024 |
| Bacteria;;Chloroflexi;;Caldilineae;;Caldilineales;;Caldilineaceae;;Caldilineaceae_uc;Caldilineaceae_uc_s                         | Caldilineaceae_uc_s     | 0      | 0.097 |
| Bacteria;;Chloroflexi;;Caldilineae;;Caldilineales;;Caldilineaceae;;DQ351765_g;DQ351765_g_uc                                      | DQ351765_g_uc           | 0      | 0.024 |
| Bacteria;;Chloroflexi;;Caldilineae;;Caldilineales;;Caldilineaceae;;DQ811875_g;DQ811875_g_uc                                      | DQ811875_g_uc           | 0      | 0.218 |
| Bacteria;;Chloroflexi;;Caldilineae;;Caldilineales;;Caldilineaceae;;DQ811875_g;EU734916_s                                         | EU734916_s              | 0      | 0.121 |
| Bacteria;;Chloroflexi;;Caldilineae;;Caldilineales;;Caldilineales_uc;;Caldilineales_uc_g;Caldilineales_uc_s                       | Caldilineales_uc_s      | 0.0168 | 0.024 |
| Bacteria;;Chloroflexi;;Caldilineae;;Caldilineales;;DQ811868_f;;DQ811868_f_uc;DQ811868_f_uc_s                                     | DQ811868_f_uc_s         | 0.0168 | 0.024 |
| Bacteria;;Chloroflexi;;Caldilineae;;Caldilineales;;DQ811868_f;;DQ811868_g;DQ811868_g_uc                                          | DQ811868_g_uc           | 0.0168 | 0     |
| Bacteria;;Chloroflexi;;Caldilineae;;Caldilineales;;EF208701_f;;EF208701_f_uc;EF208701_f_uc_s                                     | EF208701_f_uc_s         | 0.0168 | 0     |
| Bacteria;;Chloroflexi;;Caldilineae;;Caldilineales;;EU385730_f;;EU385730_f_uc;EU385730_f_uc_s                                     | EU385730_f_uc_s         | 0.0505 | 0     |
| Bacteria;;Chloroflexi;;Caldilineae;;Caldilineales;;EU385730_f;;EU385730_g;EU385730_s                                             | EU385730_s              | 0.1851 | 0     |
| Bacteria;;Chloroflexi;;Caldilineae;;DQ394964_o;;DQ394964_f;;DQ394964_f_uc;DQ394964_f_uc_s                                        | DQ394964_f_uc_s         | 0.0168 | 0     |
| Bacteria;;Chloroflexi;;Caldilineae;;DQ394964_o;;DQ394964_f;;DQ394964_g;DQ394964_g_uc                                             | DQ394964_g_uc           | 0.1346 | 0.024 |
| Bacteria;;Chloroflexi;;Caldilineae;;DQ394964_o;;DQ394964_f;;DQ394964_g;DQ811867_s                                                | DQ811867_s              | 0.0168 | 0     |
| Bacteria;;Chloroflexi;;Caldilineae;;DQ394964_o;;DQ394964_f;;DQ394964_g;EF208698_s                                                | EF208698_s              | 0.1178 | 0.073 |
| Bacteria;;Chloroflexi;;Caldilineae;;DQ394964_o;;DQ811885_f;;DQ811885_f_uc;DQ811885_f_uc_s                                        | DQ811885_f_uc_s         | 0.0168 | 0     |
| Bacteria;;Chloroflexi;;Caldilineae;;EU181507_o;;AJ306746_f;;AJ306746_f_uc;AJ306746_f_uc_s                                        | AJ306746_f_uc_s         | 0.1514 | 0     |
| Bacteria;;Chloroflexi;;Caldilineae;;EU245088_o;;EU245088_f;;EU245088_g;EU245088_g_uc                                             | EU245088_g_uc           | 0.0168 | 0.024 |
| Bacteria;;Chloroflexi;;Caldilineae;;EU245088_o;;EU245088_o_uc;;EU245088_o_uc_g;EU245088_o_uc_s                                   | EU245088_o_uc_s         | 0.0168 | 0     |
| Bacteria;;Chloroflexi;;Caldilineae;;FM253648_o;;DQ394955_f;;DQ394955_f_uc;DQ394955_f_uc_s                                        | DQ394955_f_uc_s         | 0      | 0.218 |
| Bacteria;;Chloroflexi;;Caldilineae;;FM253648_o;;DQ394955_f;;DQ394955_g;DQ394955_s                                                | DQ394955_s              | 0.0168 | 0.024 |
| Bacteria;;Chloroflexi;;Dehalococcoidetes;;Dehalococcoidales;;Dehalococcoidaceae;;Dehalococcoidaceae_uc;Dehalococcoidaceae_uc_s   | Dehalococcoidaceae_uc_s | 0.0337 | 0     |
| Bacteria;;Chloroflexi;;Dehalococcoidetes;;Dehalococcoidales;;Dehalococcoidaceae;;EU487877_g;EU487877_g_uc                        | EU487877_g_uc           | 0.0168 | 0     |
| Bacteria;;Chloroflexi;;Dehalococcoidetes;;Dehalococcoidales;;Dehalococcoidaceae;;EU487877_g;EU487877_s                           | EU487877_s              | 0.0168 | 0     |
| Bacteria;;Chloroflexi;;Dehalococcoidetes;;Dehalococcoidales;;Dehalococcoidaceae;;EU487877_g;JQ817492_s                           | JQ817492_s              | 0.0505 | 0     |
| Bacteria;;Chloroflexi;;Dehalococcoidetes;;Dehalococcoidales;;Dehalococcoidales_uc;;Dehalococcoidales_uc_g;Dehalococcoidales_uc_s | Dehalococcoidales_uc_s  | 0.0168 | 0     |

|                                                                                                        |                |        |       |
|--------------------------------------------------------------------------------------------------------|----------------|--------|-------|
| Bacteria;;Chloroflexi;;Dehalococcoidetes;;Dehalococcoidales;;DQ811888_f;;DQ811888_f_uc;DQ811888_f_uc_s | DQ811888_f_uc_ | 0.0337 | 0     |
| Bacteria;;Chloroflexi;;Dehalococcoidetes;;Dehalococcoidales;;DQ811888_f;;DQ811888_g;GU208461_s         | GU208461_s     | 0      | 0.024 |
| Bacteria;;Chloroflexi;;Dehalococcoidetes;;Dehalococcoidales;;EU385821_f;;EU385821_f_uc;EU385821_f_uc_s | EU385821_f_uc_ | 0.1682 | 0.024 |
| Bacteria;;Chloroflexi;;Dehalococcoidetes;;Dehalococcoidales;;EU385821_f;;EU385821_g;AY704394_s         | AY704394_s     | 0.0337 | 0     |
| Bacteria;;Chloroflexi;;Dehalococcoidetes;;Dehalococcoidales;;EU385821_f;;EU385821_g;EU385821_g_uc      | EU385821_g_uc  | 0      | 0.024 |
| Bacteria;;Chloroflexi;;Dehalococcoidetes;;Dehalococcoidales;;EU385821_f;;EU385821_g;GQ143803_s         | GQ143803_s     | 0.0168 | 0     |
| Bacteria;;Chloroflexi;;Dehalococcoidetes;;Dehalococcoidales;;EU385821_f;;EU385821_g;JN230042_s         | JN230042_s     | 0.0168 | 0     |
| Bacteria;;Chloroflexi;;Dehalococcoidetes;;Dehalococcoidales;;EU385821_f;;EU385821_g;JQ817373_s         | JQ817373_s     | 0.0505 | 0     |
| Bacteria;;Chloroflexi;;Dehalococcoidetes;;Dehalococcoidales;;GQ259278_f;;DQ394968_g;AY093456_s         | AY093456_s     | 0.0505 | 0     |
| Bacteria;;Chloroflexi;;Dehalococcoidetes;;Dehalococcoidales;;GQ259278_f;;DQ394968_g;DQ394968_g_uc      | DQ394968_g_uc  | 0.0337 | 0     |
| Bacteria;;Chloroflexi;;Dehalococcoidetes;;Dehalococcoidales;;GQ259278_f;;DQ394968_g;DQ394968_s         | DQ394968_s     | 0.0168 | 0     |
| Bacteria;;Chloroflexi;;Dehalococcoidetes;;Dehalococcoidales;;GQ259278_f;;DQ394968_g;EU487866_s         | EU487866_s     | 0.0168 | 0     |
| Bacteria;;Chloroflexi;;Dehalococcoidetes;;Dehalococcoidales;;GQ259278_f;;DQ394968_g;JQ817183_s         | JQ817183_s     | 0.0168 | 0     |
| Bacteria;;Chloroflexi;;Dehalococcoidetes;;Dehalococcoidales;;GQ259278_f;;GQ259278_f_uc;GQ259278_f_uc_s | GQ259278_f_uc_ | 0.0168 | 0     |
| Bacteria;;Chloroflexi;;Dehalococcoidetes;;Dehalococcoidales;;GU553783_f;;DQ394965_g;DQ394965_g_uc      | DQ394965_g_uc  | 0.0337 | 0     |
| Bacteria;;Chloroflexi;;Dehalococcoidetes;;Dehalococcoidales;;GU553783_f;;GU553783_f_uc;GU553783_f_uc_s | GU553783_f_uc_ | 0.3365 | 0     |
| Bacteria;;Chloroflexi;;Dehalococcoidetes;;Dehalococcoidales;;GU553783_f;;GU553783_g;4P003940_s         | 4P003940_s     | 0.0168 | 0     |
| Bacteria;;Chloroflexi;;Dehalococcoidetes;;Dehalococcoidales;;GU553783_f;;GU553783_g;AY869672_s         | AY869672_s     | 0.0168 | 0     |
| Bacteria;;Chloroflexi;;Dehalococcoidetes;;Dehalococcoidales;;GU553783_f;;GU553783_g;EU181490_s         | EU181490_s     | 0.0673 | 0     |
| Bacteria;;Chloroflexi;;Dehalococcoidetes;;Dehalococcoidales;;GU553783_f;;GU553783_g;GU553783_g_uc      | GU553783_g_uc  | 0.1851 | 0     |
| Bacteria;;Chloroflexi;;Dehalococcoidetes;;Dehalococcoidales;;GU553783_f;;GU553783_g;JN123558_s         | JN123558_s     | 0.0168 | 0     |
| Bacteria;;Chloroflexi;;Dehalococcoidetes;;Dehalococcoidales;;GU553783_f;;GU553783_g;JN123571_s         | JN123571_s     | 0.0168 | 0     |
| Bacteria;;Chloroflexi;;Dehalococcoidetes;;Dehalococcoidales;;GU553783_f;;GU553783_g;JN123598_s         | JN123598_s     | 0.0168 | 0     |
| Bacteria;;Chloroflexi;;Dehalococcoidetes;;Dehalococcoidales;;GU553783_f;;GU553783_g;JN230303_s         | JN230303_s     | 0.0168 | 0     |
| Bacteria;;Chloroflexi;;Dehalococcoidetes;;Dehalococcoidales;;GU553783_f;;GU553783_g;JQ816343_s         | JQ816343_s     | 0.0168 | 0     |
| Bacteria;;Chloroflexi;;Dehalococcoidetes;;Dehalococcoidales;;GU553783_f;;GU553783_g;JQ989872_s         | JQ989872_s     | 0.0505 | 0     |
| Bacteria;;Chloroflexi;;EU335161_c;;EU335161_o;;EF076076_f;;EF076076_f_uc;EF076076_f_uc_s               | EF076076_f_uc_ | 0      | 0.048 |
| Bacteria;;Chloroflexi;;EU335161_c;;EU335161_o;;EU335161_f;;EF018589_g;EF018589_g_uc                    | EF018589_g_uc  | 0.0505 | 0.024 |
| Bacteria;;Chloroflexi;;EU335161_c;;EU335161_o;;EU335161_f;;EF018589_g;JQ279048_s                       | JQ279048_s     | 0.0168 | 0     |
| Bacteria;;Chloroflexi;;EU335161_c;;EU335161_o;;EU335161_f;;EU335161_g;EU335161_g_uc                    | EU335161_g_uc  | 0      | 0.024 |
| Bacteria;;Chloroflexi;;EU335161_c;;EU335161_o;;EU335161_f;;EU386131_g;EU386131_g_uc                    | EU386131_g_uc  | 0.0168 | 0     |
| Bacteria;;Chloroflexi;;GQ396871_c;;GQ396871_o;;GQ396871_f;;GQ396871_f_uc;GQ396871_f_uc_s               | GQ396871_f_uc_ | 0      | 0.024 |



|                                                                                                               |                    |        |       |
|---------------------------------------------------------------------------------------------------------------|--------------------|--------|-------|
| Bacteria;;Chloroflexi;;GQ396871_c;;GQ396871_o;;GQ396871_f;;GQ396871_g;EU488103_s                              | EU488103_s         | 0      | 0.024 |
| Bacteria;;Chloroflexi;;GQ396871_c;;GQ396871_o;;GQ396871_f;;GQ396871_g;GQ396871_g_uc                           | GQ396871_g_uc      | 0.0168 | 0.97  |
| Bacteria;;Chloroflexi;;SAR202_c;;SAR202_o;;AM997775_f;;AM997775_f_uc;AM997775_f_uc_s                          | AM997775_f_uc      | 0.0337 | 0.024 |
| Bacteria;;Chloroflexi;;SAR202_c;;SAR202_o;;AM997775_f;;AM997775_g;AM997775_g_uc                               | AM997775_g_uc      | 0.0337 | 0.024 |
| Bacteria;;Chloroflexi;;SAR202_c;;SAR202_o;;AM997775_f;;AM997775_g;JN229891_s                                  | JN229891_s         | 0.0673 | 0     |
| Bacteria;;Chloroflexi;;SAR202_c;;SAR202_o;;SAR202_o_uc;;SAR202_o_uc_g;SAR202_o_uc_s                           | SAR202_o_uc_s      | 0.0168 | 0     |
| Bacteria;;Chloroflexi;;Thermomicrobia;;DQ129389_o;;DQ129389_f;FJ478561_g;FJ478561_g_uc                        | FJ478561_g_uc      | 0      | 0.048 |
| Bacteria;;Cyanobacteria;;Chroobacteria;;Chroococcales;;Prochlorococcaceae;;Prochlorococcus;CP000097_s         | CP000097_s         | 0      | 0.048 |
| Bacteria;;Cyanobacteria;;Chroobacteria;;Chroococcales;;Prochlorococcaceae;;Prochlorococcus;CP000110_s         | CP000110_s         | 0      | 0.315 |
| Bacteria;;Cyanobacteria;;Chroobacteria;;Chroococcales;;Prochlorococcaceae;;Prochlorococcus;CP000435_s         | CP000435_s         | 0      | 0.024 |
| Bacteria;;Cyanobacteria;;Chroobacteria;;Chroococcales;;Prochlorococcaceae;;Prochlorococcus;CT978603_s         | CT978603_s         | 0.0168 | 0.582 |
| Bacteria;;Cyanobacteria;;Chroobacteria;;Chroococcales;;Prochlorococcaceae;;Prochlorococcus;EU804045_s         | EU804045_s         | 0      | 0.291 |
| Bacteria;;Cyanobacteria;;Chroobacteria;;Chroococcales;;Prochlorococcaceae;;Prochlorococcus;GU305804_s         | GU305804_s         | 0      | 0.145 |
| Bacteria;;Cyanobacteria;;Chroobacteria;;Chroococcales;;Prochlorococcaceae;;Prochlorococcus;HM057705_s         | HM057705_s         | 0      | 0.024 |
| Bacteria;;Cyanobacteria;;Chroobacteria;;Chroococcales;;Prochlorococcaceae;;Prochlorococcus;Prochlorococcus_uc | Prochlorococcus_uc | 0      | 0.024 |
| Bacteria;;Cyanobacteria;;JF737898_c;;AY493962_o;;AY493962_f;;AY493962_f_uc;AY493962_f_uc_s                    | AY493962_f_uc      | 0      | 0.024 |
| Bacteria;;Cyanobacteria;;JF737898_c;;GU174155_o;;GU174155_o_uc;;GU174155_o_uc_g;GU174155_o_uc_s               | GU174155_o_uc      | 0.0168 | 0     |
| Bacteria;;Cyanobacteria;;Vampirovibrio_c;;AF544207_o;;AB240501_f;;AB240501_f_uc;AB240501_f_uc_s               | AB240501_f_uc      | 0      | 0.194 |
| Bacteria;;Cyanobacteria;;Vampirovibrio_c;;AF544207_o;;AB240501_f;;AB240501_g;AB240501_g_uc                    | AB240501_g_uc      | 0      | 0.024 |
| Bacteria;;Deinococcus-Thermus;;Deinococci;;Trueperales;;Trueperaceae;;FN436135_g;HQ270413_s                   | HQ270413_s         | 0.0168 | 0.024 |
| Bacteria;;Deinococcus-Thermus;;Deinococci;;Trueperales;;Trueperaceae;;Trueperaceae_uc;Trueperaceae_uc_s       | Trueperaceae_uc    | 0      | 0.024 |
| Bacteria;;DQ394940_p;;DQ394940_c;;DQ394940_c_uc;;DQ394940_c_uc_f;;DQ394940_c_uc_g;DQ394940_c_uc_s             | DQ394940_c_uc      | 0.0168 | 0     |
| Bacteria;;DQ394940_p;;DQ394940_c;;DQ394940_o;;DQ394940_f;;DQ394940_f_uc;DQ394940_f_uc_s                       | DQ394940_f_uc      | 0.1178 | 0     |
| Bacteria;;DQ394940_p;;DQ394940_c;;DQ394940_o;;DQ394940_f;;DQ394940_g;DQ394940_g_uc                            | DQ394940_g_uc      | 0.0168 | 0     |
| Bacteria;;DQ394940_p;;DQ394940_c;;DQ394940_o;;DQ394940_o_uc;;DQ394940_o_uc_g;DQ394940_o_uc_s                  | DQ394940_o_uc      | 0.0337 | 0     |
| Bacteria;;DQ404824_p;;DQ404824_c;;DQ404824_o;;DQ404824_f;;DQ404824_f_uc;DQ404824_f_uc_s                       | DQ404824_f_uc      | 0      | 0.024 |
| Bacteria;;DQ404824_p;;DQ404824_c;;DQ404824_o;;GU118042_f;;GU118042_f_uc;GU118042_f_uc_s                       | GU118042_f_uc      | 0      | 0.048 |
| Bacteria;;DQ787710_p;;DQ787710_c;;DQ787710_o;;DQ787710_o_uc;;DQ787710_o_uc_g;DQ787710_o_uc_s                  | DQ787710_o_uc      | 0      | 0.024 |
| Bacteria;;EU048619_p;;EU048619_c;;EU048619_o;;EU048619_f;;EU048619_f_uc;EU048619_f_uc_s                       | EU048619_f_uc      | 0.0168 | 0     |
| Bacteria;;EU048619_p;;EU048619_c;;EU048619_o;;EU048619_o_uc;;EU048619_o_uc_g;EU048619_o_uc_s                  | EU048619_o_uc      | 0.0505 | 0     |
| Bacteria;;Firmicutes;;Bacilli;;Bacillales;;Alicyclobacillaceae;;Effusibacillus;JX133387_s                     | JX133387_s         | 0      | 0.024 |
| Bacteria;;Firmicutes;;Bacilli;;Bacillales;;Alicyclobacillaceae;;Tumebacillus;Tumebacillus_uc                  | Tumebacillus_uc    | 0      | 0.048 |
| Bacteria;;Firmicutes;;Bacilli;;Bacillales;;Bacillaceae;;Anaerobacillus;Anaerobacillus_uc                      | Anaerobacillus_uc  | 0.9085 | 0     |

|                                                                                                         |                     |        |       |
|---------------------------------------------------------------------------------------------------------|---------------------|--------|-------|
| Bacteria;;Firmicutes;;Bacilli;;Bacillales;;Bacillaceae;;Anaerobacillus;EU180994_s                       | EU180994_s          | 0.2187 | 0     |
| Bacteria;;Firmicutes;;Bacilli;;Bacillales;;Bacillaceae;;Anaerobacillus;JN178639_s                       | JN178639_s          | 0.2524 | 0     |
| Bacteria;;Firmicutes;;Bacilli;;Bacillales;;Bacillaceae;;Bacillaceae_uc;Bacillaceae_uc_s                 | Bacillaceae_uc_s    | 0.5552 | 0     |
| Bacteria;;Firmicutes;;Bacilli;;Bacillales;;Bacillaceae;;Bacillus;4P001286_s                             | 4P001286_s          | 0      | 0.073 |
| Bacteria;;Firmicutes;;Bacilli;;Bacillales;;Bacillaceae;;Bacillus;AB533934_s                             | AB533934_s          | 0.0168 | 0     |
| Bacteria;;Firmicutes;;Bacilli;;Bacillales;;Bacillaceae;;Bacillus;AB637194_s                             | AB637194_s          | 0      | 0.024 |
| Bacteria;;Firmicutes;;Bacilli;;Bacillales;;Bacillaceae;;Bacillus;AB695960_s                             | AB695960_s          | 0.0673 | 0.024 |
| Bacteria;;Firmicutes;;Bacilli;;Bacillales;;Bacillaceae;;Bacillus;AJ544784_s                             | AJ544784_s          | 0      | 0.121 |
| Bacteria;;Firmicutes;;Bacilli;;Bacillales;;Bacillaceae;;Bacillus;Bacillus abyssalis                     | Bacillus abyssalis  | 0      | 0.024 |
| Bacteria;;Firmicutes;;Bacilli;;Bacillales;;Bacillaceae;;Bacillus;Bacillus anthracis group               | Bacillus anthracis  | 0.0337 | 0.024 |
| Bacteria;;Firmicutes;;Bacilli;;Bacillales;;Bacillaceae;;Bacillus;Bacillus aryabhatai                    | Bacillus aryabhatai | 0      | 0.218 |
| Bacteria;;Firmicutes;;Bacilli;;Bacillales;;Bacillaceae;;Bacillus;Bacillus asahii                        | Bacillus asahii     | 0      | 0.048 |
| Bacteria;;Firmicutes;;Bacilli;;Bacillales;;Bacillaceae;;Bacillus;Bacillus benzoovorans                  | Bacillus benzoovo   | 0      | 0.073 |
| Bacteria;;Firmicutes;;Bacilli;;Bacillales;;Bacillaceae;;Bacillus;Bacillus cheonanensis                  | Bacillus cheonane   | 0.1009 | 0     |
| Bacteria;;Firmicutes;;Bacilli;;Bacillales;;Bacillaceae;;Bacillus;Bacillus circulans                     | Bacillus circulans  | 0      | 0.024 |
| Bacteria;;Firmicutes;;Bacilli;;Bacillales;;Bacillaceae;;Bacillus;Bacillus drentensis                    | Bacillus drentensi  | 0      | 0.097 |
| Bacteria;;Firmicutes;;Bacilli;;Bacillales;;Bacillaceae;;Bacillus;Bacillus fengqiensis                   | Bacillus fengqiensi | 0      | 0.024 |
| Bacteria;;Firmicutes;;Bacilli;;Bacillales;;Bacillaceae;;Bacillus;Bacillus flexus                        | Bacillus flexus     | 0      | 0.048 |
| Bacteria;;Firmicutes;;Bacilli;;Bacillales;;Bacillaceae;;Bacillus;Bacillus foraminis                     | Bacillus foraminis  | 0      | 0.024 |
| Bacteria;;Firmicutes;;Bacilli;;Bacillales;;Bacillaceae;;Bacillus;Bacillus ginsengisoli                  | Bacillus ginsengis  | 0      | 0.024 |
| Bacteria;;Firmicutes;;Bacilli;;Bacillales;;Bacillaceae;;Bacillus;Bacillus indicus group                 | Bacillus indicus g  | 0      | 0.048 |
| Bacteria;;Firmicutes;;Bacilli;;Bacillales;;Bacillaceae;;Bacillus;Bacillus luteolus                      | Bacillus luteolus   | 0.0337 | 0     |
| Bacteria;;Firmicutes;;Bacilli;;Bacillales;;Bacillaceae;;Bacillus;Bacillus niacini                       | Bacillus niacini    | 0      | 0.218 |
| Bacteria;;Firmicutes;;Bacilli;;Bacillales;;Bacillaceae;;Bacillus;Bacillus panaciterrae                  | Bacillus panaciter  | 0      | 0.048 |
| Bacteria;;Firmicutes;;Bacilli;;Bacillales;;Bacillaceae;;Bacillus;Bacillus soli                          | Bacillus soli       | 0      | 0.073 |
| Bacteria;;Firmicutes;;Bacilli;;Bacillales;;Bacillaceae;;Bacillus;Bacillus songklensis                   | Bacillus songklensi | 0      | 0.024 |
| Bacteria;;Firmicutes;;Bacilli;;Bacillales;;Bacillaceae;;Bacillus;Bacillus subterraneus                  | Bacillus subterrane | 0      | 0.048 |
| Bacteria;;Firmicutes;;Bacilli;;Bacillales;;Bacillaceae;;Bacillus;Bacillus subtilis                      | Bacillus subtilis   | 0      | 0.024 |
| Bacteria;;Firmicutes;;Bacilli;;Bacillales;;Bacillaceae;;Bacillus;Bacillus_uc                            | Bacillus_uc         | 0.1009 | 0.121 |
| Bacteria;;Firmicutes;;Bacilli;;Bacillales;;Bacillaceae;;Bacillus;D16282_s                               | D16282_s            | 0      | 0.024 |
| Bacteria;;Firmicutes;;Bacilli;;Bacillales;;Bacillaceae;;Bacillus;DQ125717_s                             | DQ125717_s          | 0      | 0.048 |
| Bacteria;;Firmicutes;;Bacilli;;Bacillales;;Bacillaceae;;Bacillus;DQ129292_s                             | DQ129292_s          | 0      | 0.048 |
| Bacteria;;Firmicutes;;Bacilli;;Bacillales;;Bacillaceae;;Bacillus;GQ407176_s                             | GQ407176_s          | 1.3123 | 0     |
| Bacteria;;Firmicutes;;Bacilli;;Bacillales;;Bacillaceae;;Bacillus;JQ978943_s                             | JQ978943_s          | 0      | 0.048 |
| Bacteria;;Firmicutes;;Bacilli;;Bacillales;;Bacillaceae;;Bacillus_g12;Bacillus neizhouensis              | Bacillus neizhoue   | 1.5814 | 0     |
| Bacteria;;Firmicutes;;Bacilli;;Bacillales;;Bacillaceae;;Bacillus_g12;Bacillus_g12_uc                    | Bacillus_g12_uc     | 0.858  | 0     |
| Bacteria;;Firmicutes;;Bacilli;;Bacillales;;Bacillaceae;;Bacillus_g2;Bacillus deserti                    | Bacillus deserti    | 0      | 0.024 |
| Bacteria;;Firmicutes;;Bacilli;;Bacillales;;Bacillaceae;;Bacillus_g26;Bacillus_g26_uc                    | Bacillus_g26_uc     | 0.7571 | 0     |
| Bacteria;;Firmicutes;;Bacilli;;Bacillales;;Bacillaceae;;Domibacillus;Domibacillus robiginosus           | Domibacillus robi   | 0      | 0.024 |
| Bacteria;;Firmicutes;;Bacilli;;Bacillales;;Bacillaceae;;Domibacillus;Domibacillus_uc                    | Domibacillus_uc     | 0      | 0.024 |
| Bacteria;;Firmicutes;;Bacilli;;Bacillales;;Bacillaceae;;Sediminibacillus;Sediminibacillus_uc            | Sediminibacillus_   | 0.0168 | 0     |
| Bacteria;;Firmicutes;;Bacilli;;Bacillales;;Bacillales_uc;Bacillales_uc_g;Bacillales_uc_s                | Bacillales_uc_s     | 0.0505 | 0.024 |
| Bacteria;;Firmicutes;;Bacilli;;Bacillales;;Paenibacillaceae;;Ammoniphilus;Ammoniphilus_uc               | Ammoniphilus_uc     | 0      | 0.024 |
| Bacteria;;Firmicutes;;Bacilli;;Bacillales;;Paenibacillaceae;;Oxalophagus;AB672312_s                     | AB672312_s          | 0      | 0.024 |
| Bacteria;;Firmicutes;;Bacilli;;Bacillales;;Paenibacillaceae;;Oxalophagus;Oxalophagus_uc                 | Oxalophagus_uc      | 0      | 0.024 |
| Bacteria;;Firmicutes;;Bacilli;;Bacillales;;Paenibacillaceae;;Paenibacillaceae_uc;Paenibacillaceae_uc_s  | Paenibacillaceae_   | 0      | 0.097 |
| Bacteria;;Firmicutes;;Bacilli;;Bacillales;;Paenibacillaceae;;Paenibacillus;Paenibacillus glucanolyticus | Paenibacillus gluc  | 0.0168 | 0     |
| Bacteria;;Firmicutes;;Bacilli;;Bacillales;;Paenibacillaceae;;Paenibacillus;Paenibacillus_uc             | Paenibacillus_uc    | 0      | 0.121 |

|                                                                                                                          |                     |        |       |
|--------------------------------------------------------------------------------------------------------------------------|---------------------|--------|-------|
| Bacteria;;Firmicutes;;Bacilli;;Bacillales;;Planococcaceae;;Jeotgalibacillus;Jeotgalibacillus campisalis                  | Jeotgalibacillus ca | 0.0168 | 0     |
| Bacteria;;Firmicutes;;Bacilli;;Bacillales;;Planococcaceae;;Jeotgalibacillus;Jeotgalibacillus marinus                     | Jeotgalibacillus m  | 1.7497 | 0     |
| Bacteria;;Firmicutes;;Bacilli;;Bacillales;;Planococcaceae;;Jeotgalibacillus;Jeotgalibacillus_uc                          | Jeotgalibacillus_u  | 0.0337 | 0     |
| Bacteria;;Firmicutes;;Bacilli;;Bacillales;;Planococcaceae;;Lysinibacillus;Lysinibacillus odysseyi                        | Lysinibacillus ody  | 0      | 0.024 |
| Bacteria;;Firmicutes;;Bacilli;;Bacillales;;Planococcaceae;;Paenisporosarcina;Paenisporosarcina antarctica                | Paenisporosarcina   | 0.3365 | 0     |
| Bacteria;;Firmicutes;;Bacilli;;Bacillales;;Planococcaceae;;Paenisporosarcina;Paenisporosarcina indica                    | Paenisporosarcina   | 0.1009 | 0     |
| Bacteria;;Firmicutes;;Bacilli;;Bacillales;;Planococcaceae;;Paenisporosarcina;Paenisporosarcina macmurdoensis             | Paenisporosarcina   | 0.4879 | 0     |
| Bacteria;;Firmicutes;;Bacilli;;Bacillales;;Planococcaceae;;Paenisporosarcina;Paenisporosarcina quisquiliarum             | Paenisporosarcina   | 22.628 | 0     |
| Bacteria;;Firmicutes;;Bacilli;;Bacillales;;Planococcaceae;;Paenisporosarcina;Paenisporosarcina_uc                        | Paenisporosarcina   | 0.5384 | 0     |
| Bacteria;;Firmicutes;;Bacilli;;Bacillales;;Planococcaceae;;Planococcaceae_uc;Planococcaceae_uc_s                         | Planococcaceae_u    | 0.2019 | 0     |
| Bacteria;;Firmicutes;;Bacilli;;Bacillales;;Sporolactobacillaceae;;Fictibacillus;Fictibacillus nanhaiensis group          | Fictibacillus nanh  | 0      | 0.024 |
| Bacteria;;Firmicutes;;Bacilli;;Bacillales;;Sporolactobacillaceae;;Fictibacillus;Fictibacillus_uc                         | Fictibacillus_uc    | 0      | 0.024 |
| Bacteria;;Firmicutes;;Bacilli;;Bacillales;;Thermoactinomycetaceae;;Shimazuella;Shimazuella_uc                            | Shimazuella_uc      | 0      | 0.024 |
| Bacteria;;Firmicutes;;Bacilli;;Bacillales;;Thermoactinomycetaceae;;Thermoactinomycetaceae_uc;Thermoactinomycetaceae_uc_s | Thermoactinomy      | 0      | 0.024 |
| Bacteria;;Firmicutes;;Bacilli;;Lactobacillales;;Streptococcaceae;;Streptococcus;Streptococcus mitis                      | Streptococcus mit   | 0      | 0.024 |
| Bacteria;;Firmicutes;;Clostridia;;Clostridia_uc;;Clostridia_uc_f;;Clostridia_uc_g;Clostridia_uc_s                        | Clostridia_uc_s     | 0.0168 | 0.024 |
| Bacteria;;Firmicutes;;Clostridia;;Clostridiales;;Acidaminobacter_f;;Acidaminobacter_f_uc;Acidaminobacter_f_uc_s          | Acidaminobacter_    | 0.0168 | 0     |
| Bacteria;;Firmicutes;;Clostridia;;Clostridiales;;Anaerovirgula_f;;Anaerovirgula_f_uc;Anaerovirgula_f_uc_s                | Anaerovirgula_f_u   | 0      | 0.073 |
| Bacteria;;Firmicutes;;Clostridia;;Clostridiales;;Anaerovirgula_f;;Caminicella;Caminicella_uc                             | Caminicella_uc      | 0.0168 | 0.024 |
| Bacteria;;Firmicutes;;Clostridia;;Clostridiales;;Christensenellaceae;;FJ264756_g;FJ264756_g_uc                           | FJ264756_g_uc       | 0      | 0.024 |
| Bacteria;;Firmicutes;;Clostridia;;Clostridiales;;Clostridiaceae;;Clostridiaceae_uc;Clostridiaceae_uc_s                   | Clostridiaceae_uc   | 0      | 0.218 |
| Bacteria;;Firmicutes;;Clostridia;;Clostridiales;;Clostridiaceae;;Clostridium;AB470963_s                                  | AB470963_s          | 0      | 0.073 |
| Bacteria;;Firmicutes;;Clostridia;;Clostridiales;;Clostridiaceae;;Clostridium;AB486804_s                                  | AB486804_s          | 0      | 0.048 |
| Bacteria;;Firmicutes;;Clostridia;;Clostridiales;;Clostridiaceae;;Clostridium;AB486908_s                                  | AB486908_s          | 0      | 0.024 |
| Bacteria;;Firmicutes;;Clostridia;;Clostridiales;;Clostridiaceae;;Clostridium;Clostridium beijerinckii group              | Clostridium beijer  | 0      | 0.024 |
| Bacteria;;Firmicutes;;Clostridia;;Clostridiales;;Clostridiaceae;;Clostridium;Clostridium butyricum                       | Clostridium butyr   | 0      | 0.073 |
| Bacteria;;Firmicutes;;Clostridia;;Clostridiales;;Clostridiaceae;;Clostridium;Clostridium celatum                         | Clostridium celatu  | 0      | 0.024 |
| Bacteria;;Firmicutes;;Clostridia;;Clostridiales;;Clostridiaceae;;Clostridium;Clostridium chromiireducens                 | Clostridium chron   | 0      | 0.267 |
| Bacteria;;Firmicutes;;Clostridia;;Clostridiales;;Clostridiaceae;;Clostridium;Clostridium dakarensis                      | Clostridium dakar   | 0      | 0.024 |
| Bacteria;;Firmicutes;;Clostridia;;Clostridiales;;Clostridiaceae;;Clostridium;Clostridium ganghwense                      | Clostridium gangh   | 0.0168 | 0     |
| Bacteria;;Firmicutes;;Clostridia;;Clostridiales;;Clostridiaceae;;Clostridium;Clostridium nitrophenolicum                 | Clostridium nitrop  | 0      | 0.024 |
| Bacteria;;Firmicutes;;Clostridia;;Clostridiales;;Clostridiaceae;;Clostridium;Clostridium oceanicum                       | Clostridium ocean   | 0      | 0.024 |
| Bacteria;;Firmicutes;;Clostridia;;Clostridiales;;Clostridiaceae;;Clostridium;Clostridium puniceum                        | Clostridium punic   | 0      | 0.073 |
| Bacteria;;Firmicutes;;Clostridia;;Clostridiales;;Clostridiaceae;;Clostridium;Clostridium saccharobutylicum               | Clostridium sacch   | 0      | 0.024 |
| Bacteria;;Firmicutes;;Clostridia;;Clostridiales;;Clostridiaceae;;Clostridium;Clostridium_uc                              | Clostridium_uc      | 0      | 0.315 |

|                                                                                                                             |                    |        |       |
|-----------------------------------------------------------------------------------------------------------------------------|--------------------|--------|-------|
| Bacteria;;Firmicutes;;Clostridia;;Clostridiales;;Clostridiaceae;;Clostridium;GQ360027_s                                     | GQ360027_s         | 0      | 0.024 |
| Bacteria;;Firmicutes;;Clostridia;;Clostridiales;;Clostridiaceae;;Clostridium;GQ487902_s                                     | GQ487902_s         | 0      | 0.048 |
| Bacteria;;Firmicutes;;Clostridia;;Clostridiales;;Clostridiaceae;;Clostridium;JQ670716_s                                     | JQ670716_s         | 0      | 0.024 |
| Bacteria;;Firmicutes;;Clostridia;;Clostridiales;;Clostridiaceae;;Oceanirhabdus;Oceanirhabdus sedimicola                     | Oceanirhabdus sed  | 0      | 0.048 |
| Bacteria;;Firmicutes;;Clostridia;;Clostridiales;;Clostridiales_uc;;Clostridiales_uc_g;Clostridiales_uc_s                    | Clostridiales_uc_s | 0.0337 | 0.073 |
| Bacteria;;Firmicutes;;Clostridia;;Clostridiales;;Clostridium_g8_f;;Clostridium_g8_f_uc;Clostridium_g8_f_uc_s                | Clostridium_g8_f   | 0      | 0.024 |
| Bacteria;;Firmicutes;;Clostridia;;Clostridiales;;Epulopiscium_f;;Epulopiscium;GQ359998_s                                    | GQ359998_s         | 0      | 0.024 |
| Bacteria;;Firmicutes;;Clostridia;;Clostridiales;;EU234093_f;;EU234093_f_uc;EU234093_f_uc_s                                  | EU234093_f_uc_s    | 0.0168 | 0     |
| Bacteria;;Firmicutes;;Clostridia;;Clostridiales;;Gracilibacteraceae;;FJ439822_g;FJ439822_g_uc                               | FJ439822_g_uc      | 0      | 0.024 |
| Bacteria;;Firmicutes;;Clostridia;;Clostridiales;;Lachnospiraceae;;Anaerosporobacter;AB487451_s                              | AB487451_s         | 0      | 0.024 |
| Bacteria;;Firmicutes;;Clostridia;;Clostridiales;;Lachnospiraceae;;Anaerosporobacter;Anaerosporobacter_uc                    | Anaerosporobacte   | 0      | 0.024 |
| Bacteria;;Firmicutes;;Clostridia;;Clostridiales;;Lachnospiraceae;;Lachnospiraceae_uc;Lachnospiraceae_uc_s                   | Lachnospiraceae_   | 0      | 0.048 |
| Bacteria;;Firmicutes;;Clostridia;;Clostridiales;;Natranaerovirga_f;;Natranaerovirga_f_uc;Natranaerovirga_f_uc_s             | Natranaerovirga_f  | 0.0168 | 0.218 |
| Bacteria;;Firmicutes;;Clostridia;;Clostridiales;;Peptostreptococcaceae;;Asaccharospora;FJ681620_s                           | FJ681620_s         | 0      | 0.024 |
| Bacteria;;Firmicutes;;Clostridia;;Clostridiales;;Peptostreptococcaceae;;Clostridium_g4;Clostridium_bifermentans             | Clostridium bifer  | 0      | 0.024 |
| Bacteria;;Firmicutes;;Clostridia;;Clostridiales;;Peptostreptococcaceae;;Clostridium_g4;Eubacterium_tenne                    | Eubacterium tenu   | 0.0168 | 0     |
| Bacteria;;Firmicutes;;Clostridia;;Clostridiales;;Peptostreptococcaceae;;Clostridium_g4;GQ867474_s                           | GQ867474_s         | 0      | 0.024 |
| Bacteria;;Firmicutes;;Clostridia;;Clostridiales;;Peptostreptococcaceae;;Peptostreptococcaceae_uc;Peptostreptococcaceae_uc_s | Peptostreptococca  | 0      | 0.024 |
| Bacteria;;Firmicutes;;Clostridia;;Clostridiales;;Peptostreptococcaceae;;Romboutsia;EU472508_s                               | EU472508_s         | 0      | 0.024 |
| Bacteria;;Firmicutes;;Clostridia;;Clostridiales;;Peptostreptococcaceae;;Romboutsia;JMMB_s                                   | JMMB_s             | 0      | 0.048 |
| Bacteria;;Firmicutes;;Clostridia;;Clostridiales;;Peptostreptococcaceae;;Romboutsia;Romboutsia_ilealis                       | Romboutsia ilealis | 0      | 0.048 |
| Bacteria;;Firmicutes;;Clostridia;;Clostridiales;;Peptostreptococcaceae;;Romboutsia;Romboutsia_lituseburensis                | Romboutsia lituse  | 0      | 0.364 |
| Bacteria;;Firmicutes;;Clostridia;;Clostridiales;;Peptostreptococcaceae;;Romboutsia;Romboutsia_uc                            | Romboutsia_uc      | 0      | 0.048 |
| Bacteria;;Firmicutes;;Clostridia;;Clostridiales;;Peptostreptococcaceae;;Sporacetigenium;GU597971_s                          | GU597971_s         | 0      | 0.048 |
| Bacteria;;Firmicutes;;Clostridia;;Clostridiales;;Peptostreptococcaceae;;Tepidibacter;Tepidibacter_mesophilus                | Tepidibacter meso  | 0.0168 | 0     |
| Bacteria;;Firmicutes;;Clostridia;;Clostridiales;;Peptostreptococcaceae;;Terrisporobacter;Terrisporobacter_mayombei          | Terrisporobacter r | 0      | 0.024 |
| Bacteria;;Firmicutes;;Clostridia;;Clostridiales;;Ruminococcaceae;;AB240379_g;AB240379_g_uc                                  | AB240379_g_uc      | 0      | 0.048 |
| Bacteria;;Firmicutes;;Clostridia;;Clostridiales;;Ruminococcaceae;;AB240379_g;AB307638_s                                     | AB307638_s         | 0      | 0.024 |
| Bacteria;;Firmicutes;;Clostridia;;Clostridiales;;Ruminococcaceae;;Acetivibrio;Acetivibrio_uc                                | Acetivibrio_uc     | 0      | 0.024 |
| Bacteria;;Firmicutes;;Clostridia;;Clostridiales;;Ruminococcaceae;;Clostridium_g25;Clostridium_g25_uc                        | Clostridium_g25_   | 0      | 0.024 |
| Bacteria;;Firmicutes;;Clostridia;;Clostridiales;;Ruminococcaceae;;Ruminococcaceae_uc;Ruminococcaceae_uc_s                   | Ruminococcaceae    | 0      | 0.291 |
| Bacteria;;Firmicutes;;Clostridia;;Clostridiales;;Syntrophomonadaceae;;Syntrophomonadaceae_uc;Syntrophomonadaceae_uc_s       | Syntrophomonada    | 0      | 0.048 |
| Bacteria;;Firmicutes;;Clostridia;;Clostridiales;;Thermohalobacter_f;;Thermohalobacter_f_uc;Thermohalobacter_f_uc_s          | Thermohalobacter   | 0      | 0.024 |
| Bacteria;;Firmicutes;;Clostridia;;Clostridiales;;Veillonellaceae;;FJ196297_g;FJ196297_g_uc                                  | FJ196297_g_uc      | 0      | 0.048 |
| Bacteria;;Firmicutes;;Clostridia;;Clostridiales;;Veillonellaceae;;Veillonellaceae_uc;Veillonellaceae_uc_s                   | Veillonellaceae_u  | 0      | 0.024 |

|                                                                                                                                              |                    |        |       |
|----------------------------------------------------------------------------------------------------------------------------------------------|--------------------|--------|-------|
| Bacteria;;Firmicutes;;Clostridia;;Halanaerobiales;;Halanaerobiales_uc;;Halanaerobiales_uc_g;Halanaerobiales_uc_s                             | Halanaerobiales_u  | 0      | 0.024 |
| Bacteria;;Firmicutes;;Clostridia;;Halanaerobiales;;Halobacteroidaceae;;DQ330743_g;DQ330743_g_uc                                              | DQ330743_g_uc      | 0      | 0.024 |
| Bacteria;;Firmicutes;;Clostridia;;Halanaerobiales;;Halobacteroidaceae;;Halobacteroidaceae_uc;Halobacteroidaceae_uc_s                         | Halobacteroidacea  | 0.0168 | 0     |
| Bacteria;;Firmicutes;;Clostridia;;Hydrogenispora_o;;Hydrogenispora_f;;FN436105_g;AB486569_s                                                  | AB486569_s         | 0      | 0.048 |
| Bacteria;;Firmicutes;;Clostridia;;Hydrogenispora_o;;Hydrogenispora_f;;Hydrogenispora_f_uc;Hydrogenispora_f_uc_s                              | Hydrogenispora_f   | 0      | 0.024 |
| Bacteria;;Firmicutes;;Clostridia;;Sporotomaculum_o;;Sporotomaculum_f;;GQ921411_g;HM066376_s                                                  | HM066376_s         | 0      | 0.024 |
| Bacteria;;Firmicutes;;Clostridia;;Sporotomaculum_o;;Sporotomaculum_f;;Sporotomaculum_f_uc;Sporotomaculum_f_uc_s                              | Sporotomaculum_    | 0      | 0.048 |
| Bacteria;;Firmicutes;;Clostridia;;Symbiobacterium_o;;Symbiobacterium_f;;Symbiobacterium_f_uc;Symbiobacterium_f_uc_s                          | Symbiobacterium_   | 0      | 0.024 |
| Bacteria;;Firmicutes;;Clostridia;;Thermoanaerobacterales;;Thermoanaerobacterales_uc;;Thermoanaerobacterales_uc_g;Thermoanaerobacterales_uc_s | Thermoanaerobac    | 0.0337 | 0     |
| Bacteria;;Firmicutes;;Erysipelotrichi;;Turicibacter_o;;Turicibacter_f;;Haloplasma;DQ431898_s                                                 | DQ431898_s         | 0      | 0.121 |
| Bacteria;;Firmicutes;;Erysipelotrichi;;Turicibacter_o;;Turicibacter_f;;Turicibacter_f_uc;Turicibacter_f_uc_s                                 | Turicibacter_f_uc  | 0.0168 | 0.024 |
| Bacteria;;Firmicutes;;Erysipelotrichi;;Turicibacter_o;;Turicibacter_o_uc;;Turicibacter_o_uc_g;Turicibacter_o_uc_s                            | Turicibacter_o_uc  | 0      | 0.024 |
| Bacteria;;Fusobacteria;;Fusobacteria_c;;Fusobacteriales;;Fusobacteriaceae;;Cetobacterium;Cetobacterium_somerae                               | Cetobacterium sor  | 0      | 0.024 |
| Bacteria;;Fusobacteria;;Fusobacteria_c;;Fusobacteriales;;Fusobacteriaceae;;Psychrilyobacter;Psychrilyobacter_atlanticus                      | Psychrilyobacter a | 0      | 0.024 |
| Bacteria;;Gemmatimonadetes;;Gemmatimonadetes_c;;Gemmatimonadales;;EU881211_f;;EU491374_g;EU491374_g_uc                                       | EU491374_g_uc      | 0.0505 | 0     |
| Bacteria;;Gemmatimonadetes;;Gemmatimonadetes_c;;Gemmatimonadales;;EU881211_f;;EU491374_g;EU617723_s                                          | EU617723_s         | 0      | 0.024 |
| Bacteria;;Gemmatimonadetes;;Gemmatimonadetes_c;;Gemmatimonadales;;EU881211_f;;EU881211_f_uc;EU881211_f_uc_s                                  | EU881211_f_uc_s    | 0.0505 | 0.218 |
| Bacteria;;Gemmatimonadetes;;GU568020_c;;EU374070_o;;EU374070_f;;EU374070_f_uc;EU374070_f_uc_s                                                | EU374070_f_uc_s    | 0      | 0.024 |
| Bacteria;;Gemmatimonadetes;;GU568020_c;;EU374070_o;;EU374070_f;;EU374070_g;4P004047_s                                                        | 4P004047_s         | 0.0168 | 0     |
| Bacteria;;Gemmatimonadetes;;GU568020_c;;EU374070_o;;EU374070_f;;EU374070_g;AB294923_s                                                        | AB294923_s         | 0      | 0.073 |
| Bacteria;;Gemmatimonadetes;;GU568020_c;;EU374070_o;;EU374070_f;;EU374070_g;EU374069_s                                                        | EU374069_s         | 0      | 0.024 |
| Bacteria;;Gemmatimonadetes;;GU568020_c;;EU374070_o;;EU374070_f;;EU374070_g;EU374070_g_uc                                                     | EU374070_g_uc      | 0.0337 | 0.121 |
| Bacteria;;Gemmatimonadetes;;GU568020_c;;EU374070_o;;EU374070_f;;EU374070_g;EU374070_s                                                        | EU374070_s         | 0.1851 | 0.436 |
| Bacteria;;Gemmatimonadetes;;GU568020_c;;EU374070_o;;EU374070_f;;EU374070_g;EU491357_s                                                        | EU491357_s         | 0.0168 | 0     |
| Bacteria;;Gemmatimonadetes;;GU568020_c;;EU374070_o;;EU374070_f;;EU374070_g;EU735019_s                                                        | EU735019_s         | 0.0337 | 0.048 |
| Bacteria;;Gemmatimonadetes;;GU568020_c;;EU374070_o;;EU374070_o_uc;;EU374070_o_uc_g;EU374070_o_uc_s                                           | EU374070_o_uc      | 0      | 0.024 |
| Bacteria;;Gemmatimonadetes;;GU568020_c;;GU568020_o;;GU568020_f;;AB015540_g;AB015540_g_uc                                                     | AB015540_g_uc      | 0      | 0.024 |
| Bacteria;;Gemmatimonadetes;;GU568020_c;;GU568020_o;;GU568020_f;;EU652631_g;EU652631_g_uc                                                     | EU652631_g_uc      | 0      | 0.024 |
| Bacteria;;Gemmatimonadetes;;GU568020_c;;GU568020_o;;GU568020_f;;GU568020_f_uc;GU568020_f_uc_s                                                | GU568020_f_uc      | 0.0168 | 0.17  |
| Bacteria;;Gemmatimonadetes;;GU568020_c;;GU568020_o;;GU568020_f;;GU568020_g;GU568020_g_uc                                                     | GU568020_g_uc      | 0      | 0.048 |
| Bacteria;;Gemmatimonadetes;;GU568020_c;;GU568020_o;;GU568020_f;;HM437962_g;HM437962_g_uc                                                     | HM437962_g_uc      | 0      | 0.024 |
| Bacteria;;Gemmatimonadetes;;GU568020_c;;GU568020_o;;GU568020_o_uc;;GU568020_o_uc_g;GU568020_o_uc_s                                           | GU568020_o_uc      | 0      | 0.024 |

|                                                                                                            |                     |        |       |
|------------------------------------------------------------------------------------------------------------|---------------------|--------|-------|
| Bacteria;;;Gemmatimonadetes;;GU568020_c;;HQ190281_o;;HQ190281_f;;HQ190281_g;HQ190281_g_uc                  | HQ190281_g_uc       | 0.1178 | 0     |
| Bacteria;;;Gemmatimonadetes;;GU568020_c;;HQ190281_o;;HQ190281_f;;HQ190281_g;JX193392_s                     | JX193392_s          | 0.0168 | 0     |
| Bacteria;;;Gemmatimonadetes;;GU568020_c;;HQ727642_o;;HQ727642_f;;HQ727642_f_uc;HQ727642_f_uc_s             | HQ727642_f_uc       | 0.0505 | 0.024 |
| Bacteria;;;Gemmatimonadetes;;GU568020_c;;HQ727642_o;;HQ727642_f;;HQ727642_g;HQ727642_g_uc                  | HQ727642_g_uc       | 0      | 0.024 |
| Bacteria;;;GN02;;GN02_c;;AJ224539_o;;AJ224539_o_uc;;AJ224539_o_uc_g;AJ224539_o_uc_s                        | AJ224539_o_uc_s     | 0.0168 | 0     |
| Bacteria;;;GN02;;GN02_c;;AJ224539_o;;EU246208_f;;EU246208_f_uc;EU246208_f_uc_s                             | EU246208_f_uc_s     | 0.0168 | 0.145 |
| Bacteria;;;GN02;;GN02_c;;AJ224539_o;;EU246208_f;;EU246208_g;EU246208_g_uc                                  | EU246208_g_uc       | 0      | 0.024 |
| Bacteria;;;GN02;;GN02_c;;AJ224539_o;;EU735030_f;;EU735030_f_uc;EU735030_f_uc_s                             | EU735030_f_uc_s     | 0      | 0.024 |
| Bacteria;;;GN02;;GN02_c;;FJ205371_o;;FJ205371_f;;EU386044_g;EU386044_g_uc                                  | EU386044_g_uc       | 0      | 0.024 |
| Bacteria;;;GN02;;GN02_c;;FJ205371_o;;FJ205371_f;;FJ205371_f_uc;FJ205371_f_uc_s                             | FJ205371_f_uc_s     | 0.0337 | 0.048 |
| Bacteria;;;GN02;;GN02_c;;FJ205371_o;;FJ205371_f;;FJ205371_g;FJ205371_g_uc                                  | FJ205371_g_uc       | 0      | 0.024 |
| Bacteria;;;GN02;;GN02_c;;FJ205371_o;;FJ205371_f;;FJ205371_g;FJ205371_s                                     | FJ205371_s          | 0      | 0.073 |
| Bacteria;;;GN04;;EU385751_c;;EU385751_o;;EU385751_f;;EU385751_f_uc;EU385751_f_uc_s                         | EU385751_f_uc_s     | 0.0337 | 0.048 |
| Bacteria;;;GN04;;EU385751_c;;EU385751_o;;EU592438_f;;EU592438_f_uc;EU592438_f_uc_s                         | EU592438_f_uc_s     | 0.0337 | 0     |
| Bacteria;;;GQ246394_p;;GQ246394_c;;GQ246394_o;;AM490697_f;;AM490697_f_uc;AM490697_f_uc_s                   | AM490697_f_uc_s     | 0.0168 | 0     |
| Bacteria;;;GQ246394_p;;GQ246394_c;;GQ246394_o;;GQ246394_f;;GQ246394_f_uc;GQ246394_f_uc_s                   | GQ246394_f_uc_s     | 0.0168 | 0.048 |
| Bacteria;;;GQ246394_p;;GQ246394_c;;GQ246394_o;;GQ246394_o_uc;;GQ246394_o_uc_g;GQ246394_o_uc_s              | GQ246394_o_uc_s     | 0.0168 | 0     |
| Bacteria;;;GU363019_p;;GU363019_c;;GU363019_o;;GU363019_f;;GU363019_f_uc;GU363019_f_uc_s                   | GU363019_f_uc_s     | 0.0168 | 0     |
| Bacteria;;;JQ817711_p;;JQ817711_c;;JQ817711_o;;JQ817711_f;;JQ817711_f_uc;JQ817711_f_uc_s                   | JQ817711_f_uc_s     | 0.0168 | 0     |
| Bacteria;;;JS1;;JS1_c;;JS1_o;;JS1_f;;JS1_g;AB525475_s                                                      | AB525475_s          | 0.0505 | 0     |
| Bacteria;;;Lentisphaerae;;GU196224_c;;GQ259262_o;;GQ259262_f;;GQ259262_f_uc;GQ259262_f_uc_s                | GQ259262_f_uc_s     | 0.0168 | 0     |
| Bacteria;;;Lentisphaerae;;GU196224_c;;GU196224_o;;EF574345_f;;EF574345_f_uc;EF574345_f_uc_s                | EF574345_f_uc_s     | 0.0505 | 0.145 |
| Bacteria;;;Lentisphaerae;;GU196224_c;;GU196224_o;;EF574345_f;;EF574345_g;EF574345_g_uc                     | EF574345_g_uc       | 0      | 0.024 |
| Bacteria;;;Lentisphaerae;;GU196224_c;;GU196224_o;;EF574345_f;;EF574345_g;HQ703823_s                        | HQ703823_s          | 0      | 0.024 |
| Bacteria;;;Nitrospirae;;Nitrospira_c;;EU335197_o;;EU335197_f;;EU335197_g;GQ246443_s                        | GQ246443_s          | 0.0168 | 0     |
| Bacteria;;;Nitrospirae;;Nitrospira_c;;Nitrospirales;;Nitrospiraceae;;Nitrospira;DQ351808_s                 | DQ351808_s          | 0      | 0.024 |
| Bacteria;;;Nitrospirae;;Nitrospira_c;;Nitrospirales;;Nitrospiraceae;;Nitrospira;EU055608_s                 | EU055608_s          | 0      | 0.339 |
| Bacteria;;;Nitrospirae;;Nitrospira_c;;Nitrospirales;;Nitrospiraceae;;Nitrospira;EU652665_s                 | EU652665_s          | 0      | 0.073 |
| Bacteria;;;Nitrospirae;;Nitrospira_c;;Nitrospirales;;Nitrospiraceae;;Nitrospira;JN596614_s                 | JN596614_s          | 0      | 0.073 |
| Bacteria;;;Nitrospirae;;Nitrospira_c;;Nitrospirales;;Nitrospiraceae;;Nitrospira;JX206626_s                 | JX206626_s          | 0      | 0.048 |
| Bacteria;;;Nitrospirae;;Nitrospira_c;;Nitrospirales;;Nitrospiraceae;;Nitrospira;Nitrospira_uc              | Nitrospira_uc       | 0      | 0.121 |
| Bacteria;;;Nitrospirae;;Nitrospira_c;;Nitrospirales;;Nitrospiraceae;;Nitrospiraceae_uc;Nitrospiraceae_uc_s | Nitrospiraceae_uc_s | 0.0673 | 0.048 |
| Bacteria;;;Nitrospirae;;Nitrospira_c;;Thermodesulfobivrio_o;;JF747669_f;;EU735014_g;EU385709_s             | EU385709_s          | 0.0673 | 0     |
| Bacteria;;;Nitrospirae;;Nitrospira_c;;Thermodesulfobivrio_o;;JF747669_f;;EU735014_g;EU735014_g_uc          | EU735014_g_uc       | 0.0673 | 0     |
| Bacteria;;;Nitrospirae;;Nitrospira_c;;Thermodesulfobivrio_o;;JF747669_f;;JF747669_f_uc;JF747669_f_uc_s     | JF747669_f_uc_s     | 0.3533 | 0.121 |
| Bacteria;;;Nitrospirae;;Nitrospira_c;;Thermodesulfobivrio_o;;JF747669_f;;JF747669_g;EU491391_s             | EU491391_s          | 0.0337 | 0     |
| Bacteria;;;Nitrospirae;;Nitrospira_c;;Thermodesulfobivrio_o;;JF747669_f;;JF747669_g;EU734975_s             | EU734975_s          | 0.0505 | 0     |

|                                                                                                                                              |                            |        |       |
|----------------------------------------------------------------------------------------------------------------------------------------------|----------------------------|--------|-------|
| Bacteria;;Nitrospirae;;Nitrospira_c;;Thermodesulfovibrio_o;;JF747669_f;;JF747669_g;;JF747669_g_uc                                            | JF747669_g_uc              | 0.0337 | 0     |
| Bacteria;;Nitrospirae;;Nitrospira_c;;Thermodesulfovibrio_o;;Magnetobacterium_f;;Magnetobacterium_f_uc;;Magnetobacterium_f_uc_s               | Magnetobacterium_f_uc_s    | 0.1682 | 0     |
| Bacteria;;Nitrospirae;;Nitrospira_c;;Thermodesulfovibrio_o;;Thermodesulfovibrio_f;;FR667834_g;;EU617719_s                                    | EU617719_s                 | 0      | 0.533 |
| Bacteria;;Nitrospirae;;Nitrospira_c;;Thermodesulfovibrio_o;;Thermodesulfovibrio_f;;GQ921458_g;;EU592458_s                                    | EU592458_s                 | 0      | 0.024 |
| Bacteria;;Nitrospirae;;Nitrospira_c;;Thermodesulfovibrio_o;;Thermodesulfovibrio_f;;Thermodesulfovibrio_f_uc;;Thermodesulfovibrio_f_uc_s      | Thermodesulfovibrio_f_uc_s | 0.286  | 0.267 |
| Bacteria;;Nitrospirae;;Nitrospira_c;;Thermodesulfovibrio_o;;Thermodesulfovibrio_o_uc;;Thermodesulfovibrio_o_uc_g;;Thermodesulfovibrio_o_uc_s | Thermodesulfovibrio_o_uc_s | 0.0841 | 0.024 |
| Bacteria;;NKB19;;NKB19_c;;NKB19_o;;NKB19_f;;DQ395545_g;;DQ395545_g_uc                                                                        | DQ395545_g_uc              | 0      | 0.048 |
| Bacteria;;NKB19;;NKB19_c;;NKB19_o;;NKB19_f;;NKB19_f_uc;;NKB19_f_uc_s                                                                         | NKB19_f_uc_s               | 0      | 0.048 |
| Bacteria;;OD1;;EU488087_c;;EU488087_o;;EU488087_f;;EU488087_f_uc;;EU488087_f_uc_s                                                            | EU488087_f_uc_s            | 0      | 0.024 |
| Bacteria;;OD1;;FJ547054_c;;AB504963_o;;AB504963_o_uc;;AB504963_o_uc_g;;AB504963_o_uc_s                                                       | AB504963_o_uc_s            | 0.0168 | 0     |
| Bacteria;;OD1;;FJ547054_c;;AM745141_o;;GU197432_f;;GU197432_f_uc;;GU197432_f_uc_s                                                            | GU197432_f_uc_s            | 0      | 0.048 |
| Bacteria;;OD1;;OD1_c;;OD1_c_uc;;OD1_c_uc_f;;OD1_c_uc_g;;OD1_c_uc_s                                                                           | OD1_c_uc_s                 | 0.0168 | 0     |
| Bacteria;;OD1;;OD1_c;;OD1_o;;AB015577_f;;AB015577_f_uc;;AB015577_f_uc_s                                                                      | AB015577_f_uc_s            | 0.0337 | 0.024 |
| Bacteria;;OD1;;OD1_c;;OD1_o;;AB193900_f;;AB193900_f_uc;;AB193900_f_uc_s                                                                      | AB193900_f_uc_s            | 0.0337 | 0     |
| Bacteria;;OD1;;OD1_c;;OD1_o;;AB193900_f;;FJ264776_g;;FJ264776_s                                                                              | FJ264776_s                 | 0.0168 | 0     |
| Bacteria;;OD1;;OD1_c;;OD1_o;;AM982633_f;;AM982633_f_uc;;AM982633_f_uc_s                                                                      | AM982633_f_uc_s            | 0.0168 | 0     |
| Bacteria;;OD1;;OD1_c;;OD1_o;;EU245823_f;;EU245823_f_uc;;EU245823_f_uc_s                                                                      | EU245823_f_uc_s            | 0.0168 | 0     |
| Bacteria;;OD1;;OD1_c;;OD1_o;;GQ348056_f;;GQ348056_f_uc;;GQ348056_f_uc_s                                                                      | GQ348056_f_uc_s            | 0.0168 | 0     |
| Bacteria;;OP11;;AF050605_c;;AF050605_o;;DQ811944_f;;DQ811944_f_uc;;DQ811944_f_uc_s                                                           | DQ811944_f_uc_s            | 0.0337 | 0     |
| Bacteria;;OP11;;DQ404773_c;;DQ404773_c_uc;;DQ404773_c_uc_f;;DQ404773_c_uc_g;;DQ404773_c_uc_s                                                 | DQ404773_c_uc_s            | 0.0168 | 0     |
| Bacteria;;OP11;;DQ404773_c;;DQ404773_o;;DQ404773_f;;DQ404773_f_uc;;DQ404773_f_uc_s                                                           | DQ404773_f_uc_s            | 0.0168 | 0     |
| Bacteria;;OP11;;FJ746304_c;;FJ746304_o;;FJ746304_o_uc;;FJ746304_o_uc_g;;FJ746304_o_uc_s                                                      | FJ746304_o_uc_s            | 0.0168 | 0     |
| Bacteria;;OP11;;HQ183952_c;;DQ811942_o;;DQ811942_f;;DQ811942_f_uc;;DQ811942_f_uc_s                                                           | DQ811942_f_uc_s            | 0.0168 | 0     |
| Bacteria;;OP11;;HQ183952_c;;EU386083_o;;EU386083_o_uc;;EU386083_o_uc_g;;EU386083_o_uc_s                                                      | EU386083_o_uc_s            | 0.0168 | 0     |
| Bacteria;;OP3;;FP245540_c;;FP245538_o;;FP245538_f;;FP245538_f_uc;;FP245538_f_uc_s                                                            | FP245538_f_uc_s            | 0.0168 | 0     |
| Bacteria;;OP3;;FP245540_c;;FP245540_o;;FP245540_f;;FP245540_f_uc;;FP245540_f_uc_s                                                            | FP245540_f_uc_s            | 0.0168 | 0     |
| Bacteria;;OP3;;FP245540_c;;FP245540_o;;GU472720_f;;GU180187_g;;GU180187_g_uc                                                                 | GU180187_g_uc              | 0.0168 | 0     |
| Bacteria;;OP3;;FP245540_c;;FP245540_o;;GU472720_f;;GU472720_f_uc;;GU472720_f_uc_s                                                            | GU472720_f_uc_s            | 0.0168 | 0     |
| Bacteria;;OP3;;HM243796_c;;HM243796_o;;AB015559_f;;AB015559_f_uc;;AB015559_f_uc_s                                                            | AB015559_f_uc_s            | 0.0168 | 0.024 |
| Bacteria;;OP3;;HM243796_c;;HM243796_o;;AB015559_f;;AB015559_g;;AB015559_g_uc                                                                 | AB015559_g_uc              | 0.0337 | 0     |
| Bacteria;;OP8;;OP8_c;;HQ588586_o;;HQ588586_f;;HQ588586_f_uc;;HQ588586_f_uc_s                                                                 | HQ588586_f_uc_s            | 0      | 0.024 |
| Bacteria;;OP8;;OP8_c;;OP8_c_uc;;OP8_c_uc_f;;OP8_c_uc_g;;OP8_c_uc_s                                                                           | OP8_c_uc_s                 | 0.0168 | 0     |
| Bacteria;;OP8;;OP8_c;;OP8_o;;OP8_f;;AQSP_g;4P004969_s                                                                                        | 4P004969_s                 | 0.1346 | 0     |
| Bacteria;;OP8;;OP8_c;;OP8_o;;OP8_f;;AQSP_g;AJ704718_s                                                                                        | AJ704718_s                 | 0.0168 | 0     |
| Bacteria;;OP8;;OP8_c;;OP8_o;;OP8_f;;AQSP_g;AM889144_s                                                                                        | AM889144_s                 | 0.0168 | 0.024 |
| Bacteria;;OP8;;OP8_c;;OP8_o;;OP8_f;;AQSP_g;AQSP_g_uc                                                                                         | AQSP_g_uc                  | 0.1514 | 0.024 |
| Bacteria;;OP8;;OP8_c;;OP8_o;;OP8_f;;AQSP_g;AY704402_s                                                                                        | AY704402_s                 | 0.0168 | 0     |
| Bacteria;;OP8;;OP8_c;;OP8_o;;OP8_f;;AQSP_g;DQ394925_s                                                                                        | DQ394925_s                 | 0.0505 | 0     |
| Bacteria;;OP8;;OP8_c;;OP8_o;;OP8_f;;AQSP_g;DQ394934_s                                                                                        | DQ394934_s                 | 0.0841 | 0.024 |
| Bacteria;;OP8;;OP8_c;;OP8_o;;OP8_f;;AQSP_g;EU488144_s                                                                                        | EU488144_s                 | 0.0337 | 0     |

|                                                                                                   |                 |        |       |
|---------------------------------------------------------------------------------------------------|-----------------|--------|-------|
| Bacteria;;;OP8;;OP8_c;;OP8_o;;OP8_f;;AQSP_g;EU488417_s                                            | EU488417_s      | 0.0841 | 0     |
| Bacteria;;;OP8;;OP8_c;;OP8_o;;OP8_f;;AQSP_g;GQ143758_s                                            | GQ143758_s      | 0.0168 | 0.024 |
| Bacteria;;;OP8;;OP8_c;;OP8_o;;OP8_f;;AQSP_g;JF344576_s                                            | JF344576_s      | 0.1009 | 0.024 |
| Bacteria;;;OP8;;OP8_c;;OP8_o;;OP8_f;;AQSP_g;JN230219_s                                            | JN230219_s      | 0.0168 | 0     |
| Bacteria;;;OP8;;OP8_c;;OP8_o;;OP8_f;;AQSP_g;JX391294_s                                            | JX391294_s      | 0.0168 | 0     |
| Bacteria;;;OP8;;OP8_c;;OP8_o;;OP8_f;;OP8_f_uc;OP8_f_uc_s                                          | OP8_f_uc_s      | 0.1178 | 0.024 |
| Bacteria;;;OP8;;OP8_c;;OP8_o;;OP8_o_uc;;OP8_o_uc_g;OP8_o_uc_s                                     | OP8_o_uc_s      | 0.0168 | 0     |
| Bacteria;;;Planctomycetes;;AY532588_c;;AY532588_o;;AM056027_f;;AM056027_f_uc;AM056027_f_uc_s      | AM056027_f_uc   | 0.0168 | 0.048 |
| Bacteria;;;Planctomycetes;;AY532588_c;;AY532588_o;;AM056027_f;;EU478641_g;EU478641_g_uc           | EU478641_g_uc   | 0      | 0.048 |
| Bacteria;;;Planctomycetes;;AY532588_c;;AY532588_o;;AY532588_o_uc;;AY532588_o_uc_g;AY532588_o_uc_s | AY532588_o_uc   | 0      | 0.024 |
| Bacteria;;;Planctomycetes;;AY532588_c;;AY532588_o;;FJ712535_f;;FJ712535_f_uc;FJ712535_f_uc_s      | FJ712535_f_uc_s | 0      | 0.024 |
| Bacteria;;;Planctomycetes;;Brocadia_c;;Brocadia_o;;Brocadia_o_uc;;Brocadia_o_uc_g;Brocadia_o_uc_s | Brocadia_o_uc_s | 0.0168 | 0     |
| Bacteria;;;Planctomycetes;;Brocadia_c;;Brocadia_o;;Scalindua_f;;Scalindua;DQ869384_s              | DQ869384_s      | 0      | 0.024 |
| Bacteria;;;Planctomycetes;;Brocadia_c;;DQ811902_o;;DQ811902_o_uc;;DQ811902_o_uc_g;DQ811902_o_uc_s | DQ811902_o_uc   | 0      | 0.024 |
| Bacteria;;;Planctomycetes;;Brocadia_c;;EU290720_o;;DQ521803_f;;DQ521803_f_uc;DQ521803_f_uc_s      | DQ521803_f_uc   | 0.0168 | 0     |
| Bacteria;;;Planctomycetes;;Brocadia_c;;GU145499_o;;GU145499_f;;GU145499_f_uc;GU145499_f_uc_s      | GU145499_f_uc   | 0      | 0.218 |
| Bacteria;;;Planctomycetes;;Brocadia_c;;GU145499_o;;GU145499_f;;GU145499_g;GU145499_g_uc           | GU145499_g_uc   | 0      | 0.024 |
| Bacteria;;;Planctomycetes;;Brocadia_c;;GU145499_o;;GU145499_o_uc;;GU145499_o_uc_g;GU145499_o_uc_s | GU145499_o_uc   | 0      | 0.024 |
| Bacteria;;;Planctomycetes;;FN820300_c;;FN820300_o;;FN820300_f;;FN820300_g;AB530245_s              | AB530245_s      | 0.0168 | 0     |
| Bacteria;;;Planctomycetes;;HQ681992_c;;EU050866_o;;EU050866_f;;EU050866_f_uc;EU050866_f_uc_s      | EU050866_f_uc_s | 0      | 0.024 |
| Bacteria;;;Planctomycetes;;HQ681992_c;;EU589258_o;;EU589258_f;;EU589258_f_uc;EU589258_f_uc_s      | EU589258_f_uc_s | 0      | 0.024 |
| Bacteria;;;Planctomycetes;;HQ681992_c;;EU589258_o;;EU589258_o_uc;;EU589258_o_uc_g;EU589258_o_uc_s | EU589258_o_uc   | 0.0168 | 0     |
| Bacteria;;;Planctomycetes;;HQ681992_c;;EU589258_o;;GQ250612_f;;GQ250612_f_uc;GQ250612_f_uc_s      | GQ250612_f_uc   | 0      | 0.048 |
| Bacteria;;;Planctomycetes;;JN475307_c;;JN475307_o;;JN475307_o_uc;;JN475307_o_uc_g;JN475307_o_uc_s | JN475307_o_uc_s | 0.0168 | 0     |
| Bacteria;;;Planctomycetes;;OM190_c;;OM190_o;;AF407728_f;;AF407728_f_uc;AF407728_f_uc_s            | AF407728_f_uc_s | 0      | 0.218 |
| Bacteria;;;Planctomycetes;;OM190_c;;OM190_o;;AF407728_f;;AF407728_g;AF407728_g_uc                 | AF407728_g_uc   | 0      | 0.048 |
| Bacteria;;;Planctomycetes;;OM190_c;;OM190_o;;AF407728_f;;EF208657_g;JF809791_s                    | JF809791_s      | 0      | 0.024 |
| Bacteria;;;Planctomycetes;;OM190_c;;OM190_o;;OM190_f;;OM190_f_uc;OM190_f_uc_s                     | OM190_f_uc_s    | 0      | 0.097 |
| Bacteria;;;Planctomycetes;;OM190_c;;OM190_o;;OM190_f;;OM190_g;OM190_g_uc                          | OM190_g_uc      | 0      | 0.024 |
| Bacteria;;;Planctomycetes;;OM190_c;;OM190_o;;OM190_o_uc;;OM190_o_uc_g;OM190_o_uc_s                | OM190_o_uc_s    | 0      | 0.048 |
| Bacteria;;;Planctomycetes;;Phycisphaerae;;HQ697838_o;;EU246070_f;;EU246070_f_uc;EU246070_f_uc_s   | EU246070_f_uc_s | 0.0168 | 0.024 |
| Bacteria;;;Planctomycetes;;Phycisphaerae;;HQ697838_o;;HM066343_f;;FJ205216_g;FJ205216_g_uc        | FJ205216_g_uc   | 0.0168 | 0     |
| Bacteria;;;Planctomycetes;;Phycisphaerae;;HQ697838_o;;HM066343_f;;FJ205216_g;GQ246412_s           | GQ246412_s      | 0      | 0.048 |
| Bacteria;;;Planctomycetes;;Phycisphaerae;;HQ697838_o;;HM066343_f;;HM066343_f_uc;HM066343_f_uc_s   | HM066343_f_uc   | 0.0505 | 0.145 |
| Bacteria;;;Planctomycetes;;Phycisphaerae;;HQ697838_o;;HM066343_f;;HM066343_g;HM066343_g_uc        | HM066343_g_uc   | 0      | 0.024 |
| Bacteria;;;Planctomycetes;;Phycisphaerae;;HQ697838_o;;HQ697838_f;;HQ697838_f_uc;HQ697838_f_uc_s   | HQ697838_f_uc   | 0.0505 | 0.121 |



|                                                                                                                                                                   |                    |        |       |
|-------------------------------------------------------------------------------------------------------------------------------------------------------------------|--------------------|--------|-------|
| Bacteria;;;Planctomycetes;;Phycisphaerae;;HQ697838_o;;HQ697838_f;;HQ697838_g;AB530247_s                                                                           | AB530247_s         | 0      | 0.242 |
| Bacteria;;;Planctomycetes;;Phycisphaerae;;HQ697838_o;;HQ697838_f;;HQ697838_g;EU048679_s                                                                           | EU048679_s         | 0.0337 | 0     |
| Bacteria;;;Planctomycetes;;Phycisphaerae;;HQ697838_o;;HQ697838_f;;HQ697838_g;EU385701_s                                                                           | EU385701_s         | 0      | 0.024 |
| Bacteria;;;Planctomycetes;;Phycisphaerae;;HQ697838_o;;HQ697838_f;;HQ697838_g;EU735003_s                                                                           | EU735003_s         | 0      | 0.048 |
| Bacteria;;;Planctomycetes;;Phycisphaerae;;HQ697838_o;;HQ697838_f;;HQ697838_g;HQ697838_g_uc                                                                        | HQ697838_g_uc      | 0.0505 | 0.121 |
| Bacteria;;;Planctomycetes;;Phycisphaerae;;HQ697838_o;;HQ697838_f;;HQ697838_g;JN123561_s                                                                           | JN123561_s         | 0.0168 | 0     |
| Bacteria;;;Planctomycetes;;Phycisphaerae;;HQ697838_o;;HQ697838_o_uc;;HQ697838_o_uc_g;HQ697838_o_uc_s                                                              | HQ697838_o_uc      | 0.0337 | 0.097 |
| Bacteria;;;Planctomycetes;;Phycisphaerae;;Phycisphaerae_uc;;Phycisphaerae_uc_f;;Phycisphaerae_uc_g;Phycisphaerae_uc_s                                             | Phycisphaerae_uc   | 0.0505 | 0.024 |
| Bacteria;;;Planctomycetes;;Phycisphaerae;;Phycisphaerales;;FJ936783_f;;FJ936783_f_uc;FJ936783_f_uc_s                                                              | FJ936783_f_uc_s    | 0      | 0.048 |
| Bacteria;;;Planctomycetes;;Phycisphaerae;;Phycisphaerales;;Phycisphaeraeaceae;;AJ966588_g;AJ966588_g_uc                                                           | AJ966588_g_uc      | 0      | 0.048 |
| Bacteria;;;Planctomycetes;;Phycisphaerae;;Phycisphaerales;;Phycisphaeraeaceae;;AJ966588_g;EU617891_s                                                              | EU617891_s         | 0.0168 | 0.097 |
| Bacteria;;;Planctomycetes;;Phycisphaerae;;Phycisphaerales;;Phycisphaeraeaceae;;EU050951_g;EU050951_s                                                              | EU050951_s         | 0      | 0.024 |
| Bacteria;;;Planctomycetes;;Phycisphaerae;;Phycisphaerales;;Phycisphaeraeaceae;;EU491354_g;EU491354_g_uc                                                           | EU491354_g_uc      | 0      | 0.024 |
| Bacteria;;;Planctomycetes;;Phycisphaerae;;Phycisphaerales;;Phycisphaeraeaceae;;HM446087_g;4P004385_s                                                              | 4P004385_s         | 0.0337 | 0     |
| Bacteria;;;Planctomycetes;;Phycisphaerae;;Phycisphaerales;;Phycisphaeraeaceae;;HM446087_g;4P005829_s                                                              | 4P005829_s         | 0      | 0.024 |
| Bacteria;;;Planctomycetes;;Phycisphaerae;;Phycisphaerales;;Phycisphaeraeaceae;;HM446087_g;HM446087_g_uc                                                           | HM446087_g_uc      | 0      | 0.097 |
| Bacteria;;;Planctomycetes;;Phycisphaerae;;Phycisphaerales;;Phycisphaeraeaceae;;Phycisphaeraeaceae_uc;Phycisphaeraeaceae_uc_s                                      | Phycisphaeraeaceae | 0      | 0.412 |
| Bacteria;;;Planctomycetes;;Planctomycetacia;;Planctomycetacia_uc;;Planctomycetacia_uc_f;;Planctomycetacia_uc_g;Planctomycetacia_uc_s                              | Planctomycetacia   | 0.0168 | 0     |
| Bacteria;;;Planctomycetes;;Planctomycetacia;;Planctomycetacia;;Planctomycetacia_uc;;Planctomycetacia_uc_f;;Planctomycetacia_uc_g;AB630886_g;AB630886_g_uc         | AB630886_g_uc      | 0.0168 | 0     |
| Bacteria;;;Planctomycetes;;Planctomycetacia;;Planctomycetacia;;Planctomycetacia_uc;;Planctomycetacia_uc_f;;Planctomycetacia_uc_g;AJ231182_g;AJ231182_g_uc         | AJ231182_g_uc      | 0      | 0.048 |
| Bacteria;;;Planctomycetes;;Planctomycetacia;;Planctomycetacia;;Planctomycetacia_uc;;Planctomycetacia_uc_f;;Planctomycetacia_uc_g;AJ306765_g;AJ306765_g_uc         | AJ306765_g_uc      | 0      | 0.024 |
| Bacteria;;;Planctomycetes;;Planctomycetacia;;Planctomycetacia;;Planctomycetacia_uc;;Planctomycetacia_uc_f;;Planctomycetacia_uc_g;AJ306767_g;AJ306767_g_uc         | AJ306767_g_uc      | 0      | 0.048 |
| Bacteria;;;Planctomycetes;;Planctomycetacia;;Planctomycetacia;;Planctomycetacia_uc;;Planctomycetacia_uc_f;;Planctomycetacia_uc_g;AY704401_s                       | AY704401_s         | 0      | 0.024 |
| Bacteria;;;Planctomycetes;;Planctomycetacia;;Planctomycetacia;;Planctomycetacia_uc;;Planctomycetacia_uc_f;;Planctomycetacia_uc_g;AM040104_g;AM040104_s            | AM040104_s         | 0      | 0.024 |
| Bacteria;;;Planctomycetes;;Planctomycetacia;;Planctomycetacia;;Planctomycetacia_uc;;Planctomycetacia_uc_f;;Planctomycetacia_uc_g;AM086149_g;AM086149_g_uc         | AM086149_g_uc      | 0      | 0.024 |
| Bacteria;;;Planctomycetes;;Planctomycetacia;;Planctomycetacia;;Planctomycetacia_uc;;Planctomycetacia_uc_f;;Planctomycetacia_uc_g;AM997801_g;AM997801_g_uc         | AM997801_g_uc      | 0      | 0.024 |
| Bacteria;;;Planctomycetes;;Planctomycetacia;;Planctomycetacia;;Planctomycetacia_uc;;Planctomycetacia_uc_f;;Planctomycetacia_uc_g;Bythopirellula;Bythopirellula_uc | Bythopirellula_uc  | 0.0168 | 0.145 |
| Bacteria;;;Planctomycetes;;Planctomycetacia;;Planctomycetacia;;Planctomycetacia_uc;;Planctomycetacia_uc_f;;Planctomycetacia_uc_g;JN672634_s                       | JN672634_s         | 0      | 0.048 |
| Bacteria;;;Planctomycetes;;Planctomycetacia;;Planctomycetacia;;Planctomycetacia_uc;;Planctomycetacia_uc_f;;Planctomycetacia_uc_g;4P003170_s                       | 4P003170_s         | 0      | 0.048 |
| Bacteria;;;Planctomycetes;;Planctomycetacia;;Planctomycetacia;;Planctomycetacia_uc;;Planctomycetacia_uc_f;;Planctomycetacia_uc_g;DQ394930_g;DQ394930_g_uc         | DQ394930_g_uc      | 0.0168 | 0.024 |
| Bacteria;;;Planctomycetes;;Planctomycetacia;;Planctomycetacia;;Planctomycetacia_uc;;Planctomycetacia_uc_f;;Planctomycetacia_uc_g;GQ246406_s                       | GQ246406_s         | 0      | 0.024 |

|                                                                                                                    |               |        |       |
|--------------------------------------------------------------------------------------------------------------------|---------------|--------|-------|
| Bacteria;;;Planctomycetes;;;Planctomycetacia;;;Planctomycetales;;;Planctomycetaceae;;;DQ395014_g<br>;DQ395014_g_uc | DQ395014_g_uc | 0.0168 | 0.024 |
| Bacteria;;;Planctomycetes;;;Planctomycetacia;;;Planctomycetales;;;Planctomycetaceae;;;DQ396265_g<br>;DQ396265_g_uc | DQ396265_g_uc | 0      | 0.048 |
| Bacteria;;;Planctomycetes;;;Planctomycetacia;;;Planctomycetales;;;Planctomycetaceae;;;DQ396265_g<br>;HQ721408_s    | HQ721408_s    | 0.0841 | 0.048 |
| Bacteria;;;Planctomycetes;;;Planctomycetacia;;;Planctomycetales;;;Planctomycetaceae;;;DQ811898_g<br>;DQ811898_g_uc | DQ811898_g_uc | 0      | 0.048 |
| Bacteria;;;Planctomycetes;;;Planctomycetacia;;;Planctomycetales;;;Planctomycetaceae;;;DQ811898_g<br>;DQ811898_s    | DQ811898_s    | 0      | 0.024 |
| Bacteria;;;Planctomycetes;;;Planctomycetacia;;;Planctomycetales;;;Planctomycetaceae;;;EF123574_g;<br>EF123574_g_uc | EF123574_g_uc | 0.0168 | 0.024 |
| Bacteria;;;Planctomycetes;;;Planctomycetacia;;;Planctomycetales;;;Planctomycetaceae;;;EF123574_g;<br>EF123574_s    | EF123574_s    | 0      | 0.024 |
| Bacteria;;;Planctomycetes;;;Planctomycetacia;;;Planctomycetales;;;Planctomycetaceae;;;EF125400_g;<br>EF125400_s    | EF125400_s    | 0      | 0.024 |
| Bacteria;;;Planctomycetes;;;Planctomycetacia;;;Planctomycetales;;;Planctomycetaceae;;;EF125400_g;<br>FJ203078_s    | FJ203078_s    | 0      | 0.048 |
| Bacteria;;;Planctomycetes;;;Planctomycetacia;;;Planctomycetales;;;Planctomycetaceae;;;EF125439_g;<br>EF125439_g_uc | EF125439_g_uc | 0      | 0.024 |
| Bacteria;;;Planctomycetes;;;Planctomycetacia;;;Planctomycetales;;;Planctomycetaceae;;;EF125439_g;<br>EF125439_s    | EF125439_s    | 0      | 0.024 |
| Bacteria;;;Planctomycetes;;;Planctomycetacia;;;Planctomycetales;;;Planctomycetaceae;;;EF208688_g;<br>EF208688_g_uc | EF208688_g_uc | 0      | 0.048 |
| Bacteria;;;Planctomycetes;;;Planctomycetacia;;;Planctomycetales;;;Planctomycetaceae;;;EF208715_g;<br>EF208715_g_uc | EF208715_g_uc | 0.0168 | 0.024 |
| Bacteria;;;Planctomycetes;;;Planctomycetacia;;;Planctomycetales;;;Planctomycetaceae;;;EF591886_g;<br>EF591886_g_uc | EF591886_g_uc | 0.0168 | 0     |
| Bacteria;;;Planctomycetes;;;Planctomycetacia;;;Planctomycetales;;;Planctomycetaceae;;;EU385884_g;<br>EU385884_g_uc | EU385884_g_uc | 0      | 0.024 |
| Bacteria;;;Planctomycetes;;;Planctomycetacia;;;Planctomycetales;;;Planctomycetaceae;;;EU385884_g;<br>EU385884_s    | EU385884_s    | 0      | 0.024 |
| Bacteria;;;Planctomycetes;;;Planctomycetacia;;;Planctomycetales;;;Planctomycetaceae;;;EU491467_g;<br>EU491125_s    | EU491125_s    | 0      | 0.024 |
| Bacteria;;;Planctomycetes;;;Planctomycetacia;;;Planctomycetales;;;Planctomycetaceae;;;EU491467_g;<br>EU491467_g_uc | EU491467_g_uc | 0.0337 | 0.048 |
| Bacteria;;;Planctomycetes;;;Planctomycetacia;;;Planctomycetales;;;Planctomycetaceae;;;EU491467_g;<br>HQ153945_s    | HQ153945_s    | 0.0505 | 0     |
| Bacteria;;;Planctomycetes;;;Planctomycetacia;;;Planctomycetales;;;Planctomycetaceae;;;EU491549_g;<br>EU491549_g_uc | EU491549_g_uc | 0      | 0.048 |
| Bacteria;;;Planctomycetes;;;Planctomycetacia;;;Planctomycetales;;;Planctomycetaceae;;;EU491629_g;<br>EU491629_g_uc | EU491629_g_uc | 0      | 0.024 |
| Bacteria;;;Planctomycetes;;;Planctomycetacia;;;Planctomycetales;;;Planctomycetaceae;;;EU491663_g;<br>FJ203525_s    | FJ203525_s    | 0      | 0.024 |
| Bacteria;;;Planctomycetes;;;Planctomycetacia;;;Planctomycetales;;;Planctomycetaceae;;;EU734992_g;<br>EU734992_g_uc | EU734992_g_uc | 0      | 0.024 |
| Bacteria;;;Planctomycetes;;;Planctomycetacia;;;Planctomycetales;;;Planctomycetaceae;;;EU734992_g;<br>GU362994_s    | GU362994_s    | 0      | 0.073 |
| Bacteria;;;Planctomycetes;;;Planctomycetacia;;;Planctomycetales;;;Planctomycetaceae;;;FJ542976_g;<br>AM040106_s    | AM040106_s    | 0      | 0.024 |
| Bacteria;;;Planctomycetes;;;Planctomycetacia;;;Planctomycetales;;;Planctomycetaceae;;;FJ542976_g;<br>FJ542976_g_uc | FJ542976_g_uc | 0.0168 | 0.17  |
| Bacteria;;;Planctomycetes;;;Planctomycetacia;;;Planctomycetales;;;Planctomycetaceae;;;FJ623335_g;<br>GQ250623_s    | GQ250623_s    | 0      | 0.048 |
| Bacteria;;;Planctomycetes;;;Planctomycetacia;;;Planctomycetales;;;Planctomycetaceae;;;GQ397017_g<br>;EF591889_s    | EF591889_s    | 0      | 0.024 |
| Bacteria;;;Planctomycetes;;;Planctomycetacia;;;Planctomycetales;;;Planctomycetaceae;;;GQ397017_g<br>;GQ397017_g_uc | GQ397017_g_uc | 0      | 0.024 |
| Bacteria;;;Planctomycetes;;;Planctomycetacia;;;Planctomycetales;;;Planctomycetaceae;;;GQ487921_g<br>;EU488059_s    | EU488059_s    | 0      | 0.048 |
| Bacteria;;;Planctomycetes;;;Planctomycetacia;;;Planctomycetales;;;Planctomycetaceae;;;GQ487921_g<br>;GQ487921_g_uc | GQ487921_g_uc | 0      | 0.048 |

|                                                                                                                                    |                   |        |       |
|------------------------------------------------------------------------------------------------------------------------------------|-------------------|--------|-------|
| Bacteria;;Planctomycetes;;Planctomycetacia;;Planctomycetales;;Planctomycetaceae;;GQ487921_g<br>;JN533146_s                         | JN533146_s        | 0      | 0.024 |
| Bacteria;;Planctomycetes;;Planctomycetacia;;Planctomycetales;;Planctomycetaceae;;GU118237_g<br>;GU118237_s                         | GU118237_s        | 0      | 0.073 |
| Bacteria;;Planctomycetes;;Planctomycetacia;;Planctomycetales;;Planctomycetaceae;;GU118237_g<br>;GU118263_s                         | GU118263_s        | 0      | 0.024 |
| Bacteria;;Planctomycetes;;Planctomycetacia;;Planctomycetales;;Planctomycetaceae;;GU362992_g<br>;GU362992_g_uc                      | GU362992_g_uc     | 0      | 0.024 |
| Bacteria;;Planctomycetes;;Planctomycetacia;;Planctomycetales;;Planctomycetaceae;;HQ397467_g<br>;GU118276_s                         | GU118276_s        | 0      | 0.024 |
| Bacteria;;Planctomycetes;;Planctomycetacia;;Planctomycetales;;Planctomycetaceae;;HQ397467_g<br>;HQ397467_g_uc                      | HQ397467_g_uc     | 0.0168 | 0.048 |
| Bacteria;;Planctomycetes;;Planctomycetacia;;Planctomycetales;;Planctomycetaceae;;HQ397467_g<br>;JQ269310_s                         | JQ269310_s        | 0      | 0.073 |
| Bacteria;;Planctomycetes;;Planctomycetacia;;Planctomycetales;;Planctomycetaceae;;HQ845450_g<br>;4P005489_s                         | 4P005489_s        | 0      | 0.048 |
| Bacteria;;Planctomycetes;;Planctomycetacia;;Planctomycetales;;Planctomycetaceae;;HQ845450_g<br>;4P006056_s                         | 4P006056_s        | 0      | 0.097 |
| Bacteria;;Planctomycetes;;Planctomycetacia;;Planctomycetales;;Planctomycetaceae;;HQ845450_g<br>;AY907796_s                         | AY907796_s        | 0      | 0.048 |
| Bacteria;;Planctomycetes;;Planctomycetacia;;Planctomycetales;;Planctomycetaceae;;HQ845450_g<br>;DQ289930_s                         | DQ289930_s        | 0      | 0.024 |
| Bacteria;;Planctomycetes;;Planctomycetacia;;Planctomycetales;;Planctomycetaceae;;HQ845450_g<br>;DQ396010_s                         | DQ396010_s        | 0      | 0.024 |
| Bacteria;;Planctomycetes;;Planctomycetacia;;Planctomycetales;;Planctomycetaceae;;HQ845450_g<br>;DQ889893_s                         | DQ889893_s        | 0      | 0.073 |
| Bacteria;;Planctomycetes;;Planctomycetacia;;Planctomycetales;;Planctomycetaceae;;HQ845450_g<br>;HQ845450_g_uc                      | HQ845450_g_uc     | 0.0337 | 0.17  |
| Bacteria;;Planctomycetes;;Planctomycetacia;;Planctomycetales;;Planctomycetaceae;;HQ845450_g<br>;JQ580060_s                         | JQ580060_s        | 0      | 0.048 |
| Bacteria;;Planctomycetes;;Planctomycetacia;;Planctomycetales;;Planctomycetaceae;;JF344298_g;J<br>F344298_g_uc                      | JF344298_g_uc     | 0      | 0.121 |
| Bacteria;;Planctomycetes;;Planctomycetacia;;Planctomycetales;;Planctomycetaceae;;JF344298_g;J<br>F344298_s                         | JF344298_s        | 0      | 0.024 |
| Bacteria;;Planctomycetes;;Planctomycetacia;;Planctomycetales;;Planctomycetaceae;;JF344298_g;J<br>Q579650_s                         | JQ579650_s        | 0      | 0.048 |
| Bacteria;;Planctomycetes;;Planctomycetacia;;Planctomycetales;;Planctomycetaceae;;Planctomycet<br>aceae_uc;Planctomycetaceae_uc_s   | Planctomycetaceae | 0.4038 | 3.515 |
| Bacteria;;Planctomycetes;;Planctomycetacia;;Planctomycetales;;Planctomycetaceae;;Rhodopirellul<br>a;AB294955_s                     | AB294955_s        | 0      | 0.073 |
| Bacteria;;Planctomycetes;;Planctomycetacia;;Planctomycetales;;Planctomycetaceae;;Rhodopirellul<br>a;DQ903990_s                     | DQ903990_s        | 0      | 0.048 |
| Bacteria;;Planctomycetes;;Planctomycetacia;;Planctomycetales;;Planctomycetaceae;;Rhodopirellul<br>a;FJ626909_s                     | FJ626909_s        | 0      | 0.073 |
| Bacteria;;Planctomycetes;;Planctomycetacia;;Planctomycetales;;Planctomycetaceae;;Rhodopirellul<br>a;Rhodopirellula_uc              | Rhodopirellula_uc | 0      | 0.267 |
| Bacteria;;Planctomycetes;;Planctomycetacia;;Planctomycetales;;Planctomycetaceae;;X81942_g;X<br>81942_g_uc                          | X81942_g_uc       | 0      | 0.073 |
| Bacteria;;Planctomycetes;;Planctomycetacia;;Planctomycetales;;Planctomycetales_uc;;Planctomyc<br>etales_uc_g;Planctomycetales_uc_s | Planctomycetales  | 0.0168 | 0.048 |
| Bacteria;;Planctomycetes;;Planctomycetes_uc;;Planctomycetes_uc_o;;Planctomycetes_uc_f;;Planc<br>tomycetes_uc_g;Planctomycetes_uc_s | Planctomycetes_u  | 0.0168 | 0     |
| Bacteria;;Proteobacteria;;Alphaproteobacteria;;Caulobacterales;;Caulobacteraceae;;Caulobacterace<br>ae_uc;Caulobacteraceae_uc_s    | Caulobacteraceae  | 0.0168 | 0     |
| Bacteria;;Proteobacteria;;Alphaproteobacteria;;Caulobacterales;;Caulobacterales_uc;;Caulobactera<br>les_uc_g;Caulobacterales_uc_s  | Caulobacterales_u | 0.0168 | 0     |
| Bacteria;;Proteobacteria;;Alphaproteobacteria;;Kordiimonadales;;DQ486506_f;;DQ486506_f_uc;<br>DQ486506_f_uc_s                      | DQ486506_f_uc     | 0      | 0.024 |
| Bacteria;;Proteobacteria;;Alphaproteobacteria;;Micavibrio_o;;Micavibrio_f;;DQ395494_g;EF092<br>222_s                               | EF092222_s        | 0.0168 | 0     |
| Bacteria;;Proteobacteria;;Alphaproteobacteria;;Parvularculales;;Parvularculaceae;;EU851414_g;E<br>U851414_g_uc                     | EU851414_g_uc     | 0      | 0.097 |

|                                                                                                                                  |                   |        |       |
|----------------------------------------------------------------------------------------------------------------------------------|-------------------|--------|-------|
| Bacteria;;;Proteobacteria;;Alphaproteobacteria;;Parvularculales;;Parvularculaceae;;EU851414_g;E<br>U851414_s                     | EU851414_s        | 0      | 0.121 |
| Bacteria;;;Proteobacteria;;Alphaproteobacteria;;Parvularculales;;Parvularculaceae;;EU851414_g;F<br>J203521_s                     | FJ203521_s        | 0      | 0.024 |
| Bacteria;;;Proteobacteria;;Alphaproteobacteria;;Parvularculales;;Parvularculaceae;;Parvularculacea<br>e_uc;Parvularculaceae_uc_s | Parvularculaceae_ | 0      | 0.048 |
| Bacteria;;;Proteobacteria;;Alphaproteobacteria;;Rhizobiales;;AF280843_f;;AF280843_f_uc;AF280<br>843_f_uc_s                       | AF280843_f_uc_s   | 0      | 0.024 |
| Bacteria;;;Proteobacteria;;Alphaproteobacteria;;Rhizobiales;;Afifella_f;;Afifella_f_uc;Afifella_f_u<br>c_s                       | Afifella_f_uc_s   | 0.0168 | 0.048 |
| Bacteria;;;Proteobacteria;;Alphaproteobacteria;;Rhizobiales;;AM997334_f;;AM997334_f_uc;AM9<br>97334_f_uc_s                       | AM997334_f_uc_    | 0.0841 | 0.533 |
| Bacteria;;;Proteobacteria;;Alphaproteobacteria;;Rhizobiales;;AM997334_f;;AM997334_g;AM997<br>334_g_uc                            | AM997334_g_uc     | 0.0505 | 0.606 |
| Bacteria;;;Proteobacteria;;Alphaproteobacteria;;Rhizobiales;;AM997334_f;;AM997334_g;EU4916<br>28_s                               | EU491628_s        | 0      | 0.024 |
| Bacteria;;;Proteobacteria;;Alphaproteobacteria;;Rhizobiales;;AM997334_f;;AM997334_g;FJ2034<br>88_s                               | FJ203488_s        | 0      | 0.048 |
| Bacteria;;;Proteobacteria;;Alphaproteobacteria;;Rhizobiales;;AM997334_f;;AY942776_g;AY9427<br>76_g_uc                            | AY942776_g_uc     | 0      | 0.339 |
| Bacteria;;;Proteobacteria;;Alphaproteobacteria;;Rhizobiales;;AM997334_f;;AY942776_g;AY9427<br>76_s                               | AY942776_s        | 0      | 0.073 |
| Bacteria;;;Proteobacteria;;Alphaproteobacteria;;Rhizobiales;;AM997334_f;;DQ395471_g;DQ3954<br>71_g_uc                            | DQ395471_g_uc     | 0      | 0.024 |
| Bacteria;;;Proteobacteria;;Alphaproteobacteria;;Rhizobiales;;AM997334_f;;DQ395499_g;DQ3954<br>99_g_uc                            | DQ395499_g_uc     | 0      | 0.364 |
| Bacteria;;;Proteobacteria;;Alphaproteobacteria;;Rhizobiales;;AM997334_f;;DQ395499_g;DQ3954<br>99_s                               | DQ395499_s        | 0.0168 | 0.509 |
| Bacteria;;;Proteobacteria;;Alphaproteobacteria;;Rhizobiales;;AM997334_f;;DQ395499_g;FJ99960<br>8_s                               | FJ999608_s        | 0      | 0.073 |
| Bacteria;;;Proteobacteria;;Alphaproteobacteria;;Rhizobiales;;AM997334_f;;DQ395499_g;FM2423<br>67_s                               | FM242367_s        | 0.0168 | 1.503 |
| Bacteria;;;Proteobacteria;;Alphaproteobacteria;;Rhizobiales;;AM997334_f;;EU491330_g;EU4913<br>30_g_uc                            | EU491330_g_uc     | 0.0337 | 0.073 |
| Bacteria;;;Proteobacteria;;Alphaproteobacteria;;Rhizobiales;;AM997334_f;;EU491404_g;EU4914<br>04_s                               | EU491404_s        | 0.1009 | 0     |
| Bacteria;;;Proteobacteria;;Alphaproteobacteria;;Rhizobiales;;AM997334_f;;FJ203222_g;FJ203222<br>g_uc                             | FJ203222_g_uc     | 0.0337 | 0.024 |
| Bacteria;;;Proteobacteria;;Alphaproteobacteria;;Rhizobiales;;AM997334_f;;FJ203222_g;FJ203222<br>s                                | FJ203222_s        | 0      | 0.048 |
| Bacteria;;;Proteobacteria;;Alphaproteobacteria;;Rhizobiales;;AM997334_f;;FJ545574_g;FJ545574<br>g_uc                             | FJ545574_g_uc     | 0.0168 | 0     |
| Bacteria;;;Proteobacteria;;Alphaproteobacteria;;Rhizobiales;;AM997334_f;;GQ246350_g;GQ2463<br>50_g_uc                            | GQ246350_g_uc     | 0      | 0.024 |
| Bacteria;;;Proteobacteria;;Alphaproteobacteria;;Rhizobiales;;AM997334_f;;JF514252_g;JF514252<br>g_uc                             | JF514252_g_uc     | 0.0673 | 0.073 |
| Bacteria;;;Proteobacteria;;Alphaproteobacteria;;Rhizobiales;;Anderseniella_f;;Anderseniella;Ander<br>seniella_uc                 | Anderseniella_uc  | 0.0337 | 0.048 |
| Bacteria;;;Proteobacteria;;Alphaproteobacteria;;Rhizobiales;;Anderseniella_f;;Anderseniella;DQ35<br>1777_s                       | DQ351777_s        | 0.0168 | 0.121 |
| Bacteria;;;Proteobacteria;;Alphaproteobacteria;;Rhizobiales;;Anderseniella_f;;Anderseniella_f_uc;<br>Anderseniella_f_uc_s        | Anderseniella_f_u | 0      | 0.073 |
| Bacteria;;;Proteobacteria;;Alphaproteobacteria;;Rhizobiales;;Aurantimonadaceae;;Aurantimonadac<br>eae_uc;Aurantimonadaceae_uc_s  | Aurantimonadaceae | 0      | 0.024 |
| Bacteria;;;Proteobacteria;;Alphaproteobacteria;;Rhizobiales;;Bauldia_f;;Bauldia;Bauldia_uc                                       | Bauldia_uc        | 0      | 0.242 |
| Bacteria;;;Proteobacteria;;Alphaproteobacteria;;Rhizobiales;;Bauldia_f;;Bauldia;EU050753_s                                       | EU050753_s        | 0      | 0.097 |
| Bacteria;;;Proteobacteria;;Alphaproteobacteria;;Rhizobiales;;Bauldia_f;;Bauldia;EU617827_s                                       | EU617827_s        | 0      | 0.048 |
| Bacteria;;;Proteobacteria;;Alphaproteobacteria;;Rhizobiales;;Bauldia_f;;Bauldia_f_uc;Bauldia_f_u<br>c_s                          | Bauldia_f_uc_s    | 0.0168 | 0.048 |
| Bacteria;;;Proteobacteria;;Alphaproteobacteria;;Rhizobiales;;Bradyrhizobiaceae;;Pseudolabrys;FJ4<br>78629_s                      | FJ478629_s        | 0      | 0.024 |

|                                                                                                                                   |                        |        |       |
|-----------------------------------------------------------------------------------------------------------------------------------|------------------------|--------|-------|
| Bacteria;;;Proteobacteria;;Alphaproteobacteria;;Rhizobiales;;Bradyrhizobiaceae;;Pseudolabrys;Pseudolabrys_uc                      | Pseudolabrys_uc        | 0      | 0.024 |
| Bacteria;;;Proteobacteria;;Alphaproteobacteria;;Rhizobiales;;Cohaesibacteraceae;;Cohaesibacteraceae_uc;Cohaesibacteraceae_uc_s    | Cohaesibacteraceae_uc  | 0      | 0.145 |
| Bacteria;;;Proteobacteria;;Alphaproteobacteria;;Rhizobiales;;Cohaesibacteraceae;;DQ889902_g;DQ889902_g_uc                         | DQ889902_g_uc          | 0      | 0.073 |
| Bacteria;;;Proteobacteria;;Alphaproteobacteria;;Rhizobiales;;Cohaesibacteraceae;;JF514260_g;GQ259256_s                            | GQ259256_s             | 0      | 0.048 |
| Bacteria;;;Proteobacteria;;Alphaproteobacteria;;Rhizobiales;;Cohaesibacteraceae;;JF514260_g;JF514260_g_uc                         | JF514260_g_uc          | 0      | 0.218 |
| Bacteria;;;Proteobacteria;;Alphaproteobacteria;;Rhizobiales;;Cohaesibacteraceae;;JF514260_g;JF514260_s                            | JF514260_s             | 0      | 0.242 |
| Bacteria;;;Proteobacteria;;Alphaproteobacteria;;Rhizobiales;;Cohaesibacteraceae;;Pseudahrensia;FN553443_s                         | FN553443_s             | 0      | 0.048 |
| Bacteria;;;Proteobacteria;;Alphaproteobacteria;;Rhizobiales;;Devosia_f;Devosia_f_uc;Devosia_f_uc_s                                | Devosia_f_uc_s         | 0      | 0.073 |
| Bacteria;;;Proteobacteria;;Alphaproteobacteria;;Rhizobiales;;EF574506_f;EF574506_f_uc;EF574506_f_uc_s                             | EF574506_f_uc_s        | 0      | 0.024 |
| Bacteria;;;Proteobacteria;;Alphaproteobacteria;;Rhizobiales;;FJ202622_f;FJ202622_f_uc;FJ202622_f_uc_s                             | FJ202622_f_uc_s        | 0      | 0.024 |
| Bacteria;;;Proteobacteria;;Alphaproteobacteria;;Rhizobiales;;FJ202622_f;FJ202622_g;FJ202622_g_uc                                  | FJ202622_g_uc          | 0      | 0.024 |
| Bacteria;;;Proteobacteria;;Alphaproteobacteria;;Rhizobiales;;FJ479444_f;FJ479444_f_uc;FJ479444_f_uc_s                             | FJ479444_f_uc_s        | 0.0168 | 0     |
| Bacteria;;;Proteobacteria;;Alphaproteobacteria;;Rhizobiales;;HM057812_f;HM057812_g;HM057812_g_uc                                  | HM057812_g_uc          | 0      | 0.121 |
| Bacteria;;;Proteobacteria;;Alphaproteobacteria;;Rhizobiales;;Hyphomicrobiaceae;;DQ811854_g;DQ811854_s                             | DQ811854_s             | 0      | 0.048 |
| Bacteria;;;Proteobacteria;;Alphaproteobacteria;;Rhizobiales;;Hyphomicrobiaceae;;Filomicrobium;Filomicrobium_uc                    | Filomicrobium_uc       | 0.0168 | 0.048 |
| Bacteria;;;Proteobacteria;;Alphaproteobacteria;;Rhizobiales;;Hyphomicrobiaceae;;Filomicrobium;FJ455876_s                          | FJ455876_s             | 0      | 0.024 |
| Bacteria;;;Proteobacteria;;Alphaproteobacteria;;Rhizobiales;;Hyphomicrobiaceae;;GQ500792_g;GQ500792_g_uc                          | GQ500792_g_uc          | 0      | 0.194 |
| Bacteria;;;Proteobacteria;;Alphaproteobacteria;;Rhizobiales;;Hyphomicrobiaceae;;Hyphomicrobiaceae_uc;Hyphomicrobiaceae_uc_s       | Hyphomicrobiaceae_uc   | 0      | 0.218 |
| Bacteria;;;Proteobacteria;;Alphaproteobacteria;;Rhizobiales;;Hyphomicrobiaceae;;Hyphomicrobium;FJ197410_s                         | FJ197410_s             | 1.4637 | 0.291 |
| Bacteria;;;Proteobacteria;;Alphaproteobacteria;;Rhizobiales;;Hyphomicrobiaceae;;Hyphomicrobium;Hyphomicrobium_uc                  | Hyphomicrobium_uc      | 0.0168 | 0.145 |
| Bacteria;;;Proteobacteria;;Alphaproteobacteria;;Rhizobiales;;Hyphomicrobiaceae;;Methyloceanibacter;Methyloceanibacter caenitepidi | Methyloceanibacter     | 0      | 0.121 |
| Bacteria;;;Proteobacteria;;Alphaproteobacteria;;Rhizobiales;;Hyphomicrobiaceae;;Methyloligella;AB015245_s                         | AB015245_s             | 0.0168 | 0     |
| Bacteria;;;Proteobacteria;;Alphaproteobacteria;;Rhizobiales;;Hyphomicrobiaceae;;Methyloligella;AB240235_s                         | AB240235_s             | 0.5047 | 0.339 |
| Bacteria;;;Proteobacteria;;Alphaproteobacteria;;Rhizobiales;;Hyphomicrobiaceae;;Methyloligella;EF632942_s                         | EF632942_s             | 0      | 0.024 |
| Bacteria;;;Proteobacteria;;Alphaproteobacteria;;Rhizobiales;;Hyphomicrobiaceae;;Methyloligella;FM211779_s                         | FM211779_s             | 0.0505 | 2.327 |
| Bacteria;;;Proteobacteria;;Alphaproteobacteria;;Rhizobiales;;Hyphomicrobiaceae;;Methyloligella;Methyloligella_uc                  | Methyloligella_uc      | 0.0168 | 0.291 |
| Bacteria;;;Proteobacteria;;Alphaproteobacteria;;Rhizobiales;;Methylobacteriaceae;;GQ249556_g;GQ249556_g_uc                        | GQ249556_g_uc          | 0      | 0.073 |
| Bacteria;;;Proteobacteria;;Alphaproteobacteria;;Rhizobiales;;Methylobacteriaceae;;GQ249556_g;JF183815_s                           | JF183815_s             | 0      | 0.024 |
| Bacteria;;;Proteobacteria;;Alphaproteobacteria;;Rhizobiales;;Methylobacteriaceae;;Methylobacteriaceae_uc;Methylobacteriaceae_uc_s | Methylobacteriaceae_uc | 0      | 0.024 |
| Bacteria;;;Proteobacteria;;Alphaproteobacteria;;Rhizobiales;;Methylobacteriaceae;;Microvirga;Microvirga aerilata                  | Microvirga aerilata    | 0      | 0.024 |
| Bacteria;;;Proteobacteria;;Alphaproteobacteria;;Rhizobiales;;Methylocystaceae;;Methylocystis;Methylosinus sporium                 | Methylosinus sporium   | 0      | 0.048 |

|                                                                                                                                     |                    |        |       |
|-------------------------------------------------------------------------------------------------------------------------------------|--------------------|--------|-------|
| Bacteria;;Proteobacteria;;Alphaproteobacteria;;Rhizobiales;;Parvibaculum_f;;Parvibaculum_f_uc; Parvibaculum_f_uc_s                  | Parvibaculum_f_u   | 0.0168 | 0.073 |
| Bacteria;;Proteobacteria;;Alphaproteobacteria;;Rhizobiales;;Phyllobacteriaceae;;Hoefflea;EF123312_s                                 | EF123312_s         | 0      | 0.364 |
| Bacteria;;Proteobacteria;;Alphaproteobacteria;;Rhizobiales;;Phyllobacteriaceae;;Hoefflea;Hoefflea_uc                                | Hoefflea_uc        | 0      | 0.024 |
| Bacteria;;Proteobacteria;;Alphaproteobacteria;;Rhizobiales;;Phyllobacteriaceae;;Phyllobacteriaceae_uc;Phyllobacteriaceae_uc_s       | Phyllobacteriaceae | 0      | 0.024 |
| Bacteria;;Proteobacteria;;Alphaproteobacteria;;Rhizobiales;;Prosthecomicrobium_f;;Prosthecomicrobium_f_uc;Prosthecomicrobium_f_uc_s | Prosthecomicrobiu  | 0.0168 | 0     |
| Bacteria;;Proteobacteria;;Alphaproteobacteria;;Rhizobiales;;Rhodobiaceae;;Rhodobiaceae_uc;Rhodobiaceae_uc_s                         | Rhodobiaceae_uc    | 0      | 0.048 |
| Bacteria;;Proteobacteria;;Alphaproteobacteria;;Rhizobiales;;Rhodobiaceae;;Tepidamorphus;Tepidamorphus_uc                            | Tepidamorphus_u    | 0.0505 | 0.024 |
| Bacteria;;Proteobacteria;;Alphaproteobacteria;;Rhizobiales;;Rhodoligotrophos_f;;AF370880_g;EU234324_s                               | EU234324_s         | 0      | 0.024 |
| Bacteria;;Proteobacteria;;Alphaproteobacteria;;Rhizobiales;;Rhodoligotrophos_f;;FJ479146_g;FJ479146_s                               | FJ479146_s         | 0      | 0.024 |
| Bacteria;;Proteobacteria;;Alphaproteobacteria;;Rhodobacterales;;Hyphomonadaceae;;Hyphomonadaceae_uc;Hyphomonadaceae_uc_s            | Hyphomonadaceae    | 0      | 0.024 |
| Bacteria;;Proteobacteria;;Alphaproteobacteria;;Rhodobacterales;;Rhodobacteraceae;;4P001532_g;4P001532_s                             | 4P001532_s         | 0      | 0.048 |
| Bacteria;;Proteobacteria;;Alphaproteobacteria;;Rhodobacterales;;Rhodobacteraceae;;AY258094_g;AB491826_s                             | AB491826_s         | 0      | 0.364 |
| Bacteria;;Proteobacteria;;Alphaproteobacteria;;Rhodobacterales;;Rhodobacteraceae;;AY258094_g;AY258094_g_uc                          | AY258094_g_uc      | 0.0505 | 0.194 |
| Bacteria;;Proteobacteria;;Alphaproteobacteria;;Rhodobacterales;;Rhodobacteraceae;;AY258094_g;FJ748819_s                             | FJ748819_s         | 0      | 0.073 |
| Bacteria;;Proteobacteria;;Alphaproteobacteria;;Rhodobacterales;;Rhodobacteraceae;;AY345433_g;AY345433_g_uc                          | AY345433_g_uc      | 0      | 0.024 |
| Bacteria;;Proteobacteria;;Alphaproteobacteria;;Rhodobacterales;;Rhodobacteraceae;;Boseongicola;Boseongicola aestuarii               | Boseongicola aest  | 0.0168 | 0.048 |
| Bacteria;;Proteobacteria;;Alphaproteobacteria;;Rhodobacterales;;Rhodobacteraceae;;DQ395503_g;DQ395503_g_uc                          | DQ395503_g_uc      | 0.0168 | 0     |
| Bacteria;;Proteobacteria;;Alphaproteobacteria;;Rhodobacterales;;Rhodobacteraceae;;DQ446108_g;DQ446108_g_uc                          | DQ446108_g_uc      | 0      | 0.024 |
| Bacteria;;Proteobacteria;;Alphaproteobacteria;;Rhodobacterales;;Rhodobacteraceae;;DQ811851_g;DQ811851_g_uc                          | DQ811851_g_uc      | 0      | 0.048 |
| Bacteria;;Proteobacteria;;Alphaproteobacteria;;Rhodobacterales;;Rhodobacteraceae;;GQ249531_g;DQ811853_s                             | DQ811853_s         | 0      | 0.145 |
| Bacteria;;Proteobacteria;;Alphaproteobacteria;;Rhodobacterales;;Rhodobacteraceae;;GQ249531_g;FJ202586_s                             | FJ202586_s         | 0      | 0.024 |
| Bacteria;;Proteobacteria;;Alphaproteobacteria;;Rhodobacterales;;Rhodobacteraceae;;GQ249531_g;GQ249531_g_uc                          | GQ249531_g_uc      | 0      | 0.412 |
| Bacteria;;Proteobacteria;;Alphaproteobacteria;;Rhodobacterales;;Rhodobacteraceae;;GQ249531_g;GU118103_s                             | GU118103_s         | 0      | 0.048 |
| Bacteria;;Proteobacteria;;Alphaproteobacteria;;Rhodobacterales;;Rhodobacteraceae;;GQ249531_g;GU118199_s                             | GU118199_s         | 0      | 0.024 |
| Bacteria;;Proteobacteria;;Alphaproteobacteria;;Rhodobacterales;;Rhodobacteraceae;;Halocynthiibacter;FJ196058_s                      | FJ196058_s         | 0.0168 | 0     |
| Bacteria;;Proteobacteria;;Alphaproteobacteria;;Rhodobacterales;;Rhodobacteraceae;;Hasllibacter;Hasllibacter_uc                      | Hasllibacter_uc    | 0      | 0.024 |
| Bacteria;;Proteobacteria;;Alphaproteobacteria;;Rhodobacterales;;Rhodobacteraceae;;JN233515_g;4P003325_s                             | 4P003325_s         | 0      | 0.024 |
| Bacteria;;Proteobacteria;;Alphaproteobacteria;;Rhodobacterales;;Rhodobacteraceae;;Leisingera;Leisingera methylalidivorans           | Leisingera methyl  | 0.0168 | 0     |
| Bacteria;;Proteobacteria;;Alphaproteobacteria;;Rhodobacterales;;Rhodobacteraceae;;Leisingera;Leisingera_uc                          | Leisingera_uc      | 0.0168 | 0     |
| Bacteria;;Proteobacteria;;Alphaproteobacteria;;Rhodobacterales;;Rhodobacteraceae;;Litoreibacter;Litoreibacter_uc                    | Litoreibacter_uc   | 0      | 0.024 |
| Bacteria;;Proteobacteria;;Alphaproteobacteria;;Rhodobacterales;;Rhodobacteraceae;;Litorimicrobium;Litorimicrobium taenense          | Litorimicrobium t  | 0.5384 | 0     |

|                                                                                                                               |                         |        |       |
|-------------------------------------------------------------------------------------------------------------------------------|-------------------------|--------|-------|
| Bacteria;;Proteobacteria;;Alphaproteobacteria;;Rhodobacterales;;Rhodobacteraceae;;Litorimicrobium;Litorimicrobium_uc          | Litorimicrobium_uc      | 0.5888 | 0     |
| Bacteria;;Proteobacteria;;Alphaproteobacteria;;Rhodobacterales;;Rhodobacteraceae;;Marinovum;Marinovum algicola                | Marinovum algicola      | 0.286  | 0     |
| Bacteria;;Proteobacteria;;Alphaproteobacteria;;Rhodobacterales;;Rhodobacteraceae;;Paracoccus;AM275338_s                       | AM275338_s              | 0.0168 | 0     |
| Bacteria;;Proteobacteria;;Alphaproteobacteria;;Rhodobacterales;;Rhodobacteraceae;;Paracoccus;Paracoccus marinus               | Paracoccus marinus      | 0.0168 | 0     |
| Bacteria;;Proteobacteria;;Alphaproteobacteria;;Rhodobacterales;;Rhodobacteraceae;;Paracoccus;Paracoccus oceanense             | Paracoccus oceanense    | 0.5047 | 0     |
| Bacteria;;Proteobacteria;;Alphaproteobacteria;;Rhodobacterales;;Rhodobacteraceae;;Pelagicola;Pelagicola_uc                    | Pelagicola_uc           | 0.0168 | 0     |
| Bacteria;;Proteobacteria;;Alphaproteobacteria;;Rhodobacterales;;Rhodobacteraceae;;Phaeobacter;Phaeobacter daeponensis         | Phaeobacter daeponensis | 0.0168 | 0     |
| Bacteria;;Proteobacteria;;Alphaproteobacteria;;Rhodobacterales;;Rhodobacteraceae;;Phaeobacter;Phaeobacter_uc                  | Phaeobacter_uc          | 0.0168 | 0     |
| Bacteria;;Proteobacteria;;Alphaproteobacteria;;Rhodobacterales;;Rhodobacteraceae;;Rhodobacteraceae_uc;Rhodobacteraceae_uc_s   | Rhodobacteraceae_uc     | 0.2692 | 0.097 |
| Bacteria;;Proteobacteria;;Alphaproteobacteria;;Rhodobacterales;;Rhodobacteraceae;;Roseovarius;Roseovarius_uc                  | Roseovarius_uc          | 0.1514 | 0     |
| Bacteria;;Proteobacteria;;Alphaproteobacteria;;Rhodobacterales;;Rhodobacteraceae;;Ruegeria;Ruegeria arenilitoris              | Ruegeria arenilitoris   | 0      | 0.048 |
| Bacteria;;Proteobacteria;;Alphaproteobacteria;;Rhodobacterales;;Rhodobacteraceae;;Ruegeria;Ruegeria conchae                   | Ruegeria conchae        | 0      | 0.242 |
| Bacteria;;Proteobacteria;;Alphaproteobacteria;;Rhodobacterales;;Rhodobacteraceae;;Ruegeria;Ruegeria_uc                        | Ruegeria_uc             | 0      | 0.024 |
| Bacteria;;Proteobacteria;;Alphaproteobacteria;;Rhodobacterales;;Rhodobacteraceae;;Shimia;Shimia_uc                            | Shimia_uc               | 0.0168 | 0     |
| Bacteria;;Proteobacteria;;Alphaproteobacteria;;Rhodobacterales;;Rhodobacteraceae;;Sulfitobacter;Oceanibulbus indolifex        | Oceanibulbus indolifex  | 0.0841 | 0     |
| Bacteria;;Proteobacteria;;Alphaproteobacteria;;Rhodobacterales;;Rhodobacteraceae;;Sulfitobacter;Sulfitobacter dubius          | Sulfitobacter dubius    | 4.3237 | 0     |
| Bacteria;;Proteobacteria;;Alphaproteobacteria;;Rhodobacterales;;Rhodobacteraceae;;Sulfitobacter;Sulfitobacter_uc              | Sulfitobacter_uc        | 0.0505 | 0     |
| Bacteria;;Proteobacteria;;Alphaproteobacteria;;Rhodobacterales;;Rhodobacteraceae;;Tateyamaria;Tateyamaria_uc                  | Tateyamaria_uc          | 0      | 0.024 |
| Bacteria;;Proteobacteria;;Alphaproteobacteria;;Rhodobacterales;;Rhodobacteraceae;;Thalassobius;Thalassobius aestuarii         | Thalassobius aestuarii  | 0      | 0.024 |
| Bacteria;;Proteobacteria;;Alphaproteobacteria;;Rhodobacterales;;Rhodobacteraceae;;Thalassobius;Thalassobius aquaeponi         | Thalassobius aquaeponi  | 0      | 0.121 |
| Bacteria;;Proteobacteria;;Alphaproteobacteria;;Rhodobacterales;;Rhodobacterales_uc;;Rhodobacterales_uc_g;Rhodobacterales_uc_s | Rhodobacterales_uc      | 0.0168 | 0     |
| Bacteria;;Proteobacteria;;Alphaproteobacteria;;Rhodospirillales;;Acetobacteraceae;;Endobacter;Endobacter_uc                   | Endobacter_uc           | 0      | 0.024 |
| Bacteria;;Proteobacteria;;Alphaproteobacteria;;Rhodospirillales;;DQ984631_f;;DQ984631_f_uc;DQ984631_f_uc_s                    | DQ984631_f_uc           | 0.0168 | 0.097 |
| Bacteria;;Proteobacteria;;Alphaproteobacteria;;Rhodospirillales;;DQ984631_f;;EU373873_g;JN672662_s                            | JN672662_s              | 0.0168 | 0.073 |
| Bacteria;;Proteobacteria;;Alphaproteobacteria;;Rhodospirillales;;DQ984631_f;;EU386027_g;EU386027_g_uc                         | EU386027_g_uc           | 0.0168 | 0     |
| Bacteria;;Proteobacteria;;Alphaproteobacteria;;Rhodospirillales;;EU799183_f;;EU799183_f_uc;EU799183_f_uc_s                    | EU799183_f_uc_s         | 0      | 0.024 |
| Bacteria;;Proteobacteria;;Alphaproteobacteria;;Rhodospirillales;;EU799183_f;;EU799183_g;AJ567552_s                            | AJ567552_s              | 0.0168 | 0.121 |
| Bacteria;;Proteobacteria;;Alphaproteobacteria;;Rhodospirillales;;EU799183_f;;EU799183_g;EU799183_g_uc                         | EU799183_g_uc           | 0      | 0.121 |
| Bacteria;;Proteobacteria;;Alphaproteobacteria;;Rhodospirillales;;EU919810_f;;EU805050_g;EU805050_g_uc                         | EU805050_g_uc           | 0      | 0.048 |
| Bacteria;;Proteobacteria;;Alphaproteobacteria;;Rhodospirillales;;EU919810_f;;EU919810_f_uc;EU919810_f_uc_s                    | EU919810_f_uc_s         | 0      | 0.024 |
| Bacteria;;Proteobacteria;;Alphaproteobacteria;;Rhodospirillales;;FM209092_f;;DQ451508_g;AY913370_s                            | AY913370_s              | 0      | 0.048 |

|                                                                                                                                           |                    |        |       |
|-------------------------------------------------------------------------------------------------------------------------------------------|--------------------|--------|-------|
| Bacteria;;;Proteobacteria;;Alphaproteobacteria;;Rhodospirillales;;Rhodospirillaceae;;AM997440_g;AJ966596_s                                | AJ966596_s         | 0      | 0.024 |
| Bacteria;;;Proteobacteria;;Alphaproteobacteria;;Rhodospirillales;;Rhodospirillaceae;;AM997440_g;AM997440_g_uc                             | AM997440_g_uc      | 0      | 0.073 |
| Bacteria;;;Proteobacteria;;Alphaproteobacteria;;Rhodospirillales;;Rhodospirillaceae;;AM997440_g;AM997440_s                                | AM997440_s         | 0      | 0.048 |
| Bacteria;;;Proteobacteria;;Alphaproteobacteria;;Rhodospirillales;;Rhodospirillaceae;;AM997440_g;EU373883_s                                | EU373883_s         | 0      | 0.024 |
| Bacteria;;;Proteobacteria;;Alphaproteobacteria;;Rhodospirillales;;Rhodospirillaceae;;AM997440_g;KC009860_s                                | KC009860_s         | 0      | 0.048 |
| Bacteria;;;Proteobacteria;;Alphaproteobacteria;;Rhodospirillales;;Rhodospirillaceae;;EU266790_g;EU266790_g_uc                             | EU266790_g_uc      | 0      | 0.048 |
| Bacteria;;;Proteobacteria;;Alphaproteobacteria;;Rhodospirillales;;Rhodospirillaceae;;EU266790_g;HQ326280_s                                | HQ326280_s         | 0      | 0.048 |
| Bacteria;;;Proteobacteria;;Alphaproteobacteria;;Rhodospirillales;;Rhodospirillaceae;;EU386018_g;EU386018_g_uc                             | EU386018_g_uc      | 0.0168 | 0     |
| Bacteria;;;Proteobacteria;;Alphaproteobacteria;;Rhodospirillales;;Rhodospirillaceae;;EU652585_g;EU617826_s                                | EU617826_s         | 0      | 0.121 |
| Bacteria;;;Proteobacteria;;Alphaproteobacteria;;Rhodospirillales;;Rhodospirillaceae;;EU652585_g;EU652585_g_uc                             | EU652585_g_uc      | 0      | 0.073 |
| Bacteria;;;Proteobacteria;;Alphaproteobacteria;;Rhodospirillales;;Rhodospirillaceae;;EU652585_g;EU652585_s                                | EU652585_s         | 0      | 0.145 |
| Bacteria;;;Proteobacteria;;Alphaproteobacteria;;Rhodospirillales;;Rhodospirillaceae;;Pelagibius;DQ289904_s                                | DQ289904_s         | 0      | 1.964 |
| Bacteria;;;Proteobacteria;;Alphaproteobacteria;;Rhodospirillales;;Rhodospirillaceae;;Pelagibius;EF125412_s                                | EF125412_s         | 0      | 0.436 |
| Bacteria;;;Proteobacteria;;Alphaproteobacteria;;Rhodospirillales;;Rhodospirillaceae;;Pelagibius;EU617823_s                                | EU617823_s         | 0.0168 | 1.091 |
| Bacteria;;;Proteobacteria;;Alphaproteobacteria;;Rhodospirillales;;Rhodospirillaceae;;Pelagibius;JN977152_s                                | JN977152_s         | 0      | 0.024 |
| Bacteria;;;Proteobacteria;;Alphaproteobacteria;;Rhodospirillales;;Rhodospirillaceae;;Pelagibius;Pelagibius_uc                             | Pelagibius_uc      | 0.0168 | 0.727 |
| Bacteria;;;Proteobacteria;;Alphaproteobacteria;;Rhodospirillales;;Rhodospirillaceae;;Rhodospirillaceae_uc;Rhodospirillaceae_uc_s          | Rhodospirillaceae  | 0.0168 | 0.194 |
| Bacteria;;;Proteobacteria;;Alphaproteobacteria;;Rickettsiales;;GQ250619_f;;AB294318_g;AB294318_g_uc                                       | AB294318_g_uc      | 0      | 0.024 |
| Bacteria;;;Proteobacteria;;Alphaproteobacteria;;SAR11;;SAR11-1_f;;Pelagibacter;GU061426_s                                                 | GU061426_s         | 0      | 0.024 |
| Bacteria;;;Proteobacteria;;Alphaproteobacteria;;Sphingomonadales;;Erythrobacteraceae;;Altererythrobacter;Altererythrobacter ishigakiensis | Altererythrobacter | 0      | 0.024 |
| Bacteria;;;Proteobacteria;;Alphaproteobacteria;;Sphingomonadales;;Erythrobacteraceae;;Altererythrobacter;AY858797_s                       | AY858797_s         | 0      | 0.024 |
| Bacteria;;;Proteobacteria;;Alphaproteobacteria;;Sphingomonadales;;Erythrobacteraceae;;Altererythrobacter;JQ427438_s                       | JQ427438_s         | 0      | 0.097 |
| Bacteria;;;Proteobacteria;;Alphaproteobacteria;;Sphingomonadales;;Erythrobacteraceae;;Erythrobacteraceae_uc;Erythrobacteraceae_uc_s       | Erythrobacteraceae | 0      | 0.024 |
| Bacteria;;;Proteobacteria;;Alphaproteobacteria;;Sphingomonadales;;Sphingomonadaceae;;Novosphingobium;Novosphingobium pentaromativorans    | Novosphingobium    | 0      | 0.024 |
| Bacteria;;;Proteobacteria;;Alphaproteobacteria;;Sphingomonadales;;Sphingomonadaceae;;Sphingomonadaceae_uc;Sphingomonadaceae_uc_s          | Sphingomonadaceae  | 0      | 0.024 |
| Bacteria;;;Proteobacteria;;Betaproteobacteria;;DQ009366_o;;DQ009366_f;;DQ009366_g;DQ009366_g_uc                                           | DQ009366_g_uc      | 0      | 0.024 |
| Bacteria;;;Proteobacteria;;Betaproteobacteria;;DQ009366_o;;DQ009366_f;;EF999367_g;EF999367_g_uc                                           | EF999367_g_uc      | 0      | 0.097 |
| Bacteria;;;Proteobacteria;;Deltaproteobacteria;;4P001481_o;;4P001481_f;;4P001956_g;4P001956_g_uc                                          | 4P001956_g_uc      | 0.1178 | 0     |
| Bacteria;;;Proteobacteria;;Deltaproteobacteria;;AB530223_o;;AB530223_o_uc;;AB530223_o_uc_g;AB530223_o_uc_s                                | AB530223_o_uc      | 0.0168 | 0     |
| Bacteria;;;Proteobacteria;;Deltaproteobacteria;;AF269002_o;;AF269002_f;;AF269002_f_uc;AF269002_f_uc_s                                     | AF269002_f_uc_s    | 0      | 0.024 |
| Bacteria;;;Proteobacteria;;Deltaproteobacteria;;AF269002_o;;AF269002_f;;AF269002_g;AF269002_g_uc                                          | AF269002_g_uc      | 0.0673 | 0     |
| Bacteria;;;Proteobacteria;;Deltaproteobacteria;;AF269002_o;;AF269002_f;;AM997922_g;AM997922_g_uc                                          | AM997922_g_uc      | 0      | 0.048 |



|                                                                                                                                                    |                        |        |       |
|----------------------------------------------------------------------------------------------------------------------------------------------------|------------------------|--------|-------|
| Bacteria;;Proteobacteria;;Deltaproteobacteria;;AF269002_o;;AF269002_f;;DQ395022_g;DQ395022_g_uc                                                    | DQ395022_g_uc          | 0.0168 | 0     |
| Bacteria;;Proteobacteria;;Deltaproteobacteria;;AF269002_o;;AF269002_f;;DQ395022_g;DQ395022_s                                                       | DQ395022_s             | 0      | 0.436 |
| Bacteria;;Proteobacteria;;Deltaproteobacteria;;AJ306774_o;;AJ306774_f;;AJ306774_g;AJ306774_g_uc                                                    | AJ306774_g_uc          | 0.0673 | 0.073 |
| Bacteria;;Proteobacteria;;Deltaproteobacteria;;AJ306774_o;;AJ306774_f;;AJ306774_g;FJ264596_s                                                       | FJ264596_s             | 0.0841 | 0.145 |
| Bacteria;;Proteobacteria;;Deltaproteobacteria;;AJ306774_o;;AJ306774_f;;AJ306774_g;JF344529_s                                                       | JF344529_s             | 0.0337 | 0.048 |
| Bacteria;;Proteobacteria;;Deltaproteobacteria;;AY214193_o;;AY214193_f;;AY214193_f_uc;AY214193_f_uc_s                                               | AY214193_f_uc          | 0      | 0.073 |
| Bacteria;;Proteobacteria;;Deltaproteobacteria;;AY214193_o;;AY214193_o_uc;;AY214193_o_uc_g;AY214193_o_uc_s                                          | AY214193_o_uc          | 0.0337 | 0     |
| Bacteria;;Proteobacteria;;Deltaproteobacteria;;Bdellovibrionales;;Bdellovibrionales_uc;;Bdellovibrionales_uc_g;Bdellovibrionales_uc_s              | Bdellovibrionales      | 0      | 0.024 |
| Bacteria;;Proteobacteria;;Deltaproteobacteria;;CU925466_o;;CU925466_f;;CU925466_f_uc;CU925466_f_uc_s                                               | CU925466_f_uc          | 0      | 0.121 |
| Bacteria;;Proteobacteria;;Deltaproteobacteria;;Deferrisoma_o;;Deferrisoma_f;;Deferrisoma;Deferrisoma_uc                                            | Deferrisoma_uc         | 0      | 0.048 |
| Bacteria;;Proteobacteria;;Deltaproteobacteria;;Deferrisoma_o;;Deferrisoma_f;;Deferrisoma_f_uc;Deferrisoma_f_uc_s                                   | Deferrisoma_f_uc       | 0      | 0.121 |
| Bacteria;;Proteobacteria;;Deltaproteobacteria;;Deferrisoma_o;;Deferrisoma_o_uc;;Deferrisoma_o_uc_g;Deferrisoma_o_uc_s                              | Deferrisoma_o_uc       | 0.0168 | 0     |
| Bacteria;;Proteobacteria;;Deltaproteobacteria;;Deltaproteobacteria_uc;;Deltaproteobacteria_uc_f;;Deltaproteobacteria_uc_g;Deltaproteobacteria_uc_s | Deltaproteobacteria_uc | 0      | 0.024 |
| Bacteria;;Proteobacteria;;Deltaproteobacteria;;Desulfobacterales;;AY771942_f;;AY771942_f_uc;AY771942_f_uc_s                                        | AY771942_f_uc          | 0.0505 | 0.024 |
| Bacteria;;Proteobacteria;;Deltaproteobacteria;;Desulfobacterales;;AY771942_f;;AY771942_g;AB177130_s                                                | AB177130_s             | 0.0168 | 0     |
| Bacteria;;Proteobacteria;;Deltaproteobacteria;;Desulfobacterales;;AY771942_f;;AY771942_g;AY771942_g_uc                                             | AY771942_g_uc          | 0.1009 | 0.048 |
| Bacteria;;Proteobacteria;;Deltaproteobacteria;;Desulfobacterales;;AY771942_f;;AY771942_g;EU386090_s                                                | EU386090_s             | 0.0168 | 0     |
| Bacteria;;Proteobacteria;;Deltaproteobacteria;;Desulfobacterales;;Desulfobacteraceae;;AJ620497_g;AJ620497_s                                        | AJ620497_s             | 0      | 0.024 |
| Bacteria;;Proteobacteria;;Deltaproteobacteria;;Desulfobacterales;;Desulfobacteraceae;;AJ704681_g;AM882638_s                                        | AM882638_s             | 0      | 0.073 |
| Bacteria;;Proteobacteria;;Deltaproteobacteria;;Desulfobacterales;;Desulfobacteraceae;;AJ704684_g;AJ704684_g_uc                                     | AJ704684_g_uc          | 0      | 0.097 |
| Bacteria;;Proteobacteria;;Deltaproteobacteria;;Desulfobacterales;;Desulfobacteraceae;;AJ704684_g;AJ704684_s                                        | AJ704684_s             | 0      | 0.048 |
| Bacteria;;Proteobacteria;;Deltaproteobacteria;;Desulfobacterales;;Desulfobacteraceae;;AM229208_g;AM229208_g_uc                                     | AM229208_g_uc          | 0.1346 | 0     |
| Bacteria;;Proteobacteria;;Deltaproteobacteria;;Desulfobacterales;;Desulfobacteraceae;;AM229208_g;KC009899_s                                        | KC009899_s             | 0.0505 | 0     |
| Bacteria;;Proteobacteria;;Deltaproteobacteria;;Desulfobacterales;;Desulfobacteraceae;;AM745130_g;AM745130_g_uc                                     | AM745130_g_uc          | 0.1009 | 0.024 |
| Bacteria;;Proteobacteria;;Deltaproteobacteria;;Desulfobacterales;;Desulfobacteraceae;;AM745130_g;AY771936_s                                        | AY771936_s             | 0.1009 | 0.024 |
| Bacteria;;Proteobacteria;;Deltaproteobacteria;;Desulfobacterales;;Desulfobacteraceae;;AM745130_g;JF344643_s                                        | JF344643_s             | 0.0168 | 0     |
| Bacteria;;Proteobacteria;;Deltaproteobacteria;;Desulfobacterales;;Desulfobacteraceae;;Desulfobacteraceae_uc;Desulfobacteraceae_uc_s                | Desulfobacteraceae_uc  | 0.0505 | 0.291 |
| Bacteria;;Proteobacteria;;Deltaproteobacteria;;Desulfobacterales;;Desulfobacteraceae;;Desulfobacterium;Desulfobacterium_uc                         | Desulfobacterium       | 0      | 0.024 |
| Bacteria;;Proteobacteria;;Deltaproteobacteria;;Desulfobacterales;;Desulfobacteraceae;;Desulfofrigus;Desulfofrigus fragile                          | Desulfofrigus frag     | 0      | 0.048 |
| Bacteria;;Proteobacteria;;Deltaproteobacteria;;Desulfobacterales;;Desulfobacteraceae;;Desulfofrigus;Desulfofrigus_uc                               | Desulfofrigus_uc       | 0      | 0.145 |
| Bacteria;;Proteobacteria;;Deltaproteobacteria;;Desulfobacterales;;Desulfobacteraceae;;Desulfosarcina;Desulfosarcina_uc                             | Desulfosarcina_uc      | 0      | 0.048 |

|                                                                                                                                                   |                          |        |       |
|---------------------------------------------------------------------------------------------------------------------------------------------------|--------------------------|--------|-------|
| Bacteria;;;Proteobacteria;;Deltaproteobacteria;;Desulfobacterales;;Desulfobacteraceae;;EU181467_g;EU181467_g_uc                                   | EU181467_g_uc            | 0      | 0.073 |
| Bacteria;;;Proteobacteria;;Deltaproteobacteria;;Desulfobacterales;;Desulfobacteraceae;;EU181467_g;EU181467_s                                      | EU181467_s               | 0.1514 | 0.145 |
| Bacteria;;;Proteobacteria;;Deltaproteobacteria;;Desulfobacterales;;Desulfobacteraceae;;EU181467_g;FM211789_s                                      | FM211789_s               | 0.0337 | 0.388 |
| Bacteria;;;Proteobacteria;;Deltaproteobacteria;;Desulfobacterales;;Desulfobacteraceae;;EU181467_g;JF344647_s                                      | JF344647_s               | 0      | 0.048 |
| Bacteria;;;Proteobacteria;;Deltaproteobacteria;;Desulfobacterales;;Desulfobacteraceae;;FM165266_g;FM165266_s                                      | FM165266_s               | 0      | 0.024 |
| Bacteria;;;Proteobacteria;;Deltaproteobacteria;;Desulfobacterales;;Desulfobacteraceae;;GQ356991_g;GQ356991_s                                      | GQ356991_s               | 0      | 0.048 |
| Bacteria;;;Proteobacteria;;Deltaproteobacteria;;Desulfobacterium_g1_o;;Desulfobacterium_g1_f;;Desulfobacterium_g1;AJ704686_s                      | AJ704686_s               | 0      | 0.024 |
| Bacteria;;;Proteobacteria;;Deltaproteobacteria;;Desulfobacterium_g1_o;;Desulfobacterium_g1_f;;Desulfobacterium_g1;Desulfobacterium_g1_uc          | Desulfobacterium_g1_uc   | 0.0337 | 0.097 |
| Bacteria;;;Proteobacteria;;Deltaproteobacteria;;Desulfobacterium_g1_o;;Desulfobacterium_g1_f;;Desulfobacterium_g1;GQ246432_s                      | GQ246432_s               | 0.2019 | 0.073 |
| Bacteria;;;Proteobacteria;;Deltaproteobacteria;;Desulfobacterium_g1_o;;Desulfobacterium_g1_f;;Desulfobacterium_g1_f_uc;Desulfobacterium_g1_f_uc_s | Desulfobacterium_g1_f_uc | 0.0505 | 0     |
| Bacteria;;;Proteobacteria;;Deltaproteobacteria;;Desulfobacterium_g1_o;;GU553714_f;;GU553714_g;EU385886_s                                          | EU385886_s               | 0.0168 | 0     |
| Bacteria;;;Proteobacteria;;Deltaproteobacteria;;Desulfobacterium_g1_o;;GU553714_f;;GU553714_g;EU385917_s                                          | EU385917_s               | 0.0168 | 0     |
| Bacteria;;;Proteobacteria;;Deltaproteobacteria;;Desulfobulbaceae_o;;Desulfobulbaceae;;Desulfobulbaceae_uc;Desulfobulbaceae_uc_s                   | Desulfobulbaceae_uc      | 0      | 0.024 |
| Bacteria;;;Proteobacteria;;Deltaproteobacteria;;Desulfobulbaceae_o;;Desulforhopalus_f;;Desulfocapsa;Desulfocapsa_uc                               | Desulfocapsa_uc          | 0      | 0.048 |
| Bacteria;;;Proteobacteria;;Deltaproteobacteria;;Desulfobulbaceae_o;;Desulforhopalus_f;;Desulfofustis;AB294977_s                                   | AB294977_s               | 0      | 0.024 |
| Bacteria;;;Proteobacteria;;Deltaproteobacteria;;Desulfobulbaceae_o;;Desulforhopalus_f;;Desulfofustis;AJ620509_s                                   | AJ620509_s               | 0.0168 | 0     |
| Bacteria;;;Proteobacteria;;Deltaproteobacteria;;Desulfobulbaceae_o;;Desulforhopalus_f;;Desulfofustis;Desulfofustis_uc                             | Desulfofustis_uc         | 0      | 0.097 |
| Bacteria;;;Proteobacteria;;Deltaproteobacteria;;Desulfobulbaceae_o;;Desulforhopalus_f;;Desulfofustis;EF123489_s                                   | EF123489_s               | 0      | 0.024 |
| Bacteria;;;Proteobacteria;;Deltaproteobacteria;;Desulfobulbaceae_o;;Desulforhopalus_f;;Desulfopila;Desulfopila_uc                                 | Desulfopila_uc           | 0      | 0.024 |
| Bacteria;;;Proteobacteria;;Deltaproteobacteria;;Desulfobulbaceae_o;;Desulforhopalus_f;;Desulforhopalus;Desulforhopalus_uc                         | Desulforhopalus_uc       | 0      | 0.121 |
| Bacteria;;;Proteobacteria;;Deltaproteobacteria;;Desulfobulbaceae_o;;Desulforhopalus_f;;Desulforhopalus;GU119044_s                                 | GU119044_s               | 0      | 0.17  |
| Bacteria;;;Proteobacteria;;Deltaproteobacteria;;Desulfobulbaceae_o;;Desulforhopalus_f;;Desulforhopalus_f_uc;Desulforhopalus_f_uc_s                | Desulforhopalus_f_uc     | 0      | 0.097 |
| Bacteria;;;Proteobacteria;;Deltaproteobacteria;;Desulfobulbaceae_o;;EU287221_f;;EU287221_f_uc;EU287221_f_uc_s                                     | EU287221_f_uc            | 0      | 0.048 |
| Bacteria;;;Proteobacteria;;Deltaproteobacteria;;Desulfobulbaceae_o;;EU287221_f;;EU287221_g;AB530214_s                                             | AB530214_s               | 0.0337 | 0     |
| Bacteria;;;Proteobacteria;;Deltaproteobacteria;;Desulfobulbaceae_o;;EU287221_f;;EU287221_g;EU287221_g_uc                                          | EU287221_g_uc            | 0      | 0.242 |
| Bacteria;;;Proteobacteria;;Deltaproteobacteria;;Desulfobulbaceae_o;;EU287221_f;;EU287221_g;FJ416112_s                                             | FJ416112_s               | 0      | 0.024 |
| Bacteria;;;Proteobacteria;;Deltaproteobacteria;;Desulfobulbaceae_o;;EU287221_f;;EU287221_g;JX241034_s                                             | JX241034_s               | 0.0168 | 0     |
| Bacteria;;;Proteobacteria;;Deltaproteobacteria;;Desulfuromonadales;;Desulfuromonadaceae;;AJ271656_g;AJ271656_g_uc                                 | AJ271656_g_uc            | 0      | 0.267 |
| Bacteria;;;Proteobacteria;;Deltaproteobacteria;;Desulfuromonadales;;Desulfuromonadaceae;;AJ271656_g;JX241022_s                                    | JX241022_s               | 0      | 0.024 |
| Bacteria;;;Proteobacteria;;Deltaproteobacteria;;Desulfuromonadales;;Desulfuromonadaceae;;Desulfuromonadaceae_uc;Desulfuromonadaceae_uc_s          | Desulfuromonadaceae_uc   | 0      | 0.17  |
| Bacteria;;;Proteobacteria;;Deltaproteobacteria;;Desulfuromonadales;;Desulfuromonadaceae;;Pelobacter_g2;AM404382_s                                 | AM404382_s               | 0      | 0.024 |

|                                                                                                                           |                   |        |       |
|---------------------------------------------------------------------------------------------------------------------------|-------------------|--------|-------|
| Bacteria;;;Proteobacteria;;Deltaproteobacteria;;Desulfuromonadales;;Desulfuromonadaceae;;Pelobacter_g2;Pelobacter_g2_uc   | Pelobacter_g2_uc  | 0      | 0.024 |
| Bacteria;;;Proteobacteria;;Deltaproteobacteria;;Desulfuromonadales;;Geobacteraceae;;Geobacteraceae_uc;Geobacteraceae_uc_s | Geobacteraceae_uc | 0.0168 | 0     |
| Bacteria;;;Proteobacteria;;Deltaproteobacteria;;DQ154854_o;;DQ154854_f;;DQ154854_f_uc;DQ154854_f_uc_s                     | DQ154854_f_uc     | 0      | 0.024 |
| Bacteria;;;Proteobacteria;;Deltaproteobacteria;;DQ394969_o;;DQ394969_f;;DQ394969_f_uc;DQ394969_f_uc_s                     | DQ394969_f_uc     | 0      | 0.024 |
| Bacteria;;;Proteobacteria;;Deltaproteobacteria;;DQ394969_o;;DQ394969_f;;DQ394969_g;DQ394969_g_uc                          | DQ394969_g_uc     | 0      | 0.024 |
| Bacteria;;;Proteobacteria;;Deltaproteobacteria;;EF125424_o;;EF125424_f;;EF125424_f_uc;EF125424_f_uc_s                     | EF125424_f_uc_s   | 0      | 0.024 |
| Bacteria;;;Proteobacteria;;Deltaproteobacteria;;EF125424_o;;EF125424_f;;EF125424_g;EF125424_s                             | EF125424_s        | 0      | 0.024 |
| Bacteria;;;Proteobacteria;;Deltaproteobacteria;;EF574244_o;;EF574244_o_uc;;EF574244_o_uc_g;EF574244_o_uc_s                | EF574244_o_uc     | 0.0168 | 0     |
| Bacteria;;;Proteobacteria;;Deltaproteobacteria;;EU245359_o;;EU245359_f;;EU245359_g;EU245359_g_uc                          | EU245359_g_uc     | 0.0168 | 0.024 |
| Bacteria;;;Proteobacteria;;Deltaproteobacteria;;EU245359_o;;EU245359_f;;EU245359_g;EU592490_s                             | EU592490_s        | 0.0168 | 0     |
| Bacteria;;;Proteobacteria;;Deltaproteobacteria;;EU246214_o;;EU246214_f;;EU246214_f_uc;EU246214_f_uc_s                     | EU246214_f_uc_s   | 0.0337 | 0     |
| Bacteria;;;Proteobacteria;;Deltaproteobacteria;;EU491876_o;;EU491876_o_uc;;EU491876_o_uc_g;EU491876_o_uc_s                | EU491876_o_uc     | 0.0168 | 0     |
| Bacteria;;;Proteobacteria;;Deltaproteobacteria;;EU617831_o;;EU617831_f;;EU617831_f_uc;EU617831_f_uc_s                     | EU617831_f_uc_s   | 0.0673 | 0.097 |
| Bacteria;;;Proteobacteria;;Deltaproteobacteria;;EU617831_o;;EU617831_o_uc;;EU617831_o_uc_g;EU617831_o_uc_s                | EU617831_o_uc     | 0.0168 | 0     |
| Bacteria;;;Proteobacteria;;Deltaproteobacteria;;EU617842_o;;EU617842_f;;AM991259_g;AM991259_g_uc                          | AM991259_g_uc     | 0      | 0.073 |
| Bacteria;;;Proteobacteria;;Deltaproteobacteria;;EU617842_o;;EU617842_f;;AM997336_g;AM997336_g_uc                          | AM997336_g_uc     | 0      | 0.024 |
| Bacteria;;;Proteobacteria;;Deltaproteobacteria;;EU617842_o;;EU617842_f;;AM997336_g;EU925877_s                             | EU925877_s        | 0      | 0.024 |
| Bacteria;;;Proteobacteria;;Deltaproteobacteria;;EU617842_o;;EU617842_f;;AM997336_g;FJ416092_s                             | FJ416092_s        | 0      | 0.048 |
| Bacteria;;;Proteobacteria;;Deltaproteobacteria;;EU617842_o;;EU617842_f;;EU287101_g;EU287101_g_uc                          | EU287101_g_uc     | 0      | 0.024 |
| Bacteria;;;Proteobacteria;;Deltaproteobacteria;;EU617842_o;;EU617842_f;;EU287101_g;EU287101_s                             | EU287101_s        | 0      | 0.024 |
| Bacteria;;;Proteobacteria;;Deltaproteobacteria;;EU617842_o;;EU617842_f;;EU290707_g;EU290707_g_uc                          | EU290707_g_uc     | 0.1682 | 0     |
| Bacteria;;;Proteobacteria;;Deltaproteobacteria;;EU617842_o;;EU617842_f;;EU290707_g;EU290707_s                             | EU290707_s        | 0.1009 | 0.048 |
| Bacteria;;;Proteobacteria;;Deltaproteobacteria;;EU617842_o;;EU617842_f;;EU617842_f_uc;EU617842_f_uc_s                     | EU617842_f_uc_s   | 0.3365 | 0.97  |
| Bacteria;;;Proteobacteria;;Deltaproteobacteria;;EU617842_o;;EU617842_f;;EU617842_g;EU617842_s                             | EU617842_s        | 0.0673 | 0.145 |
| Bacteria;;;Proteobacteria;;Deltaproteobacteria;;EU617842_o;;EU617842_f;;EU617842_g;FJ626894_s                             | FJ626894_s        | 0      | 0.048 |
| Bacteria;;;Proteobacteria;;Deltaproteobacteria;;EU617842_o;;EU617842_f;;EU617842_g;JF809692_s                             | JF809692_s        | 0      | 0.024 |
| Bacteria;;;Proteobacteria;;Deltaproteobacteria;;EU617842_o;;EU617842_f;;EU734993_g;EU734993_g_uc                          | EU734993_g_uc     | 0      | 0.073 |
| Bacteria;;;Proteobacteria;;Deltaproteobacteria;;EU617842_o;;EU617842_f;;EU734993_g;EU734993_s                             | EU734993_s        | 0.0168 | 0.024 |
| Bacteria;;;Proteobacteria;;Deltaproteobacteria;;EU617842_o;;EU617842_f;;EU881182_g;4P003976_s                             | 4P003976_s        | 0      | 0.024 |
| Bacteria;;;Proteobacteria;;Deltaproteobacteria;;EU617842_o;;EU617842_f;;EU881182_g;AB694486_s                             | AB694486_s        | 0      | 0.024 |
| Bacteria;;;Proteobacteria;;Deltaproteobacteria;;EU617842_o;;EU617842_f;;EU881182_g;EU491396_s                             | EU491396_s        | 0      | 0.048 |

|                                                                                                           |               |        |       |
|-----------------------------------------------------------------------------------------------------------|---------------|--------|-------|
| Bacteria;;Proteobacteria;;Deltaproteobacteria;;EU617842_o;;EU617842_f;;EU881182_g;EU881182_g_uc           | EU881182_g_uc | 0      | 0.364 |
| Bacteria;;Proteobacteria;;Deltaproteobacteria;;EU617842_o;;EU617842_f;;EU881182_g;HQ703835_s              | HQ703835_s    | 0      | 0.048 |
| Bacteria;;Proteobacteria;;Deltaproteobacteria;;EU617842_o;;EU617842_f;;EU881182_g;JX241004_s              | JX241004_s    | 0      | 0.024 |
| Bacteria;;Proteobacteria;;Deltaproteobacteria;;EU617842_o;;EU617842_f;;EU881182_g;KC009877_s              | KC009877_s    | 0      | 0.121 |
| Bacteria;;Proteobacteria;;Deltaproteobacteria;;EU617842_o;;EU617842_f;;FJ416121_g;FJ416121_g_uc           | FJ416121_g_uc | 0.0337 | 0     |
| Bacteria;;Proteobacteria;;Deltaproteobacteria;;EU617842_o;;EU617842_f;;GQ246453_g;FJ203391_s              | FJ203391_s    | 0      | 0.024 |
| Bacteria;;Proteobacteria;;Deltaproteobacteria;;EU617842_o;;EU617842_f;;HQ864112_g;EU734976_s              | EU734976_s    | 0      | 0.024 |
| Bacteria;;Proteobacteria;;Deltaproteobacteria;;EU617842_o;;EU617842_f;;HQ864112_g;HQ864112_g_uc           | HQ864112_g_uc | 0      | 0.024 |
| Bacteria;;Proteobacteria;;Deltaproteobacteria;;EU617842_o;;EU617842_f;;JF344499_g;JF344499_g_uc           | JF344499_g_uc | 0.0337 | 0.121 |
| Bacteria;;Proteobacteria;;Deltaproteobacteria;;EU617842_o;;EU617842_f;;JF344499_g;JF344499_s              | JF344499_s    | 0.0168 | 0.024 |
| Bacteria;;Proteobacteria;;Deltaproteobacteria;;EU617842_o;;EU617842_o_uc;;EU617842_o_uc_g;EU617842_o_uc_s | EU617842_o_uc | 0.0337 | 0     |
| Bacteria;;Proteobacteria;;Deltaproteobacteria;;EU617842_o;;FM253643_f;;EU734958_g;EU734958_g_uc           | EU734958_g_uc | 0      | 0.024 |
| Bacteria;;Proteobacteria;;Deltaproteobacteria;;EU617842_o;;FM253643_f;;FM253643_f_uc;FM253643_f_uc_s      | FM253643_f_uc | 0.0673 | 0.17  |
| Bacteria;;Proteobacteria;;Deltaproteobacteria;;EU617842_o;;FM253643_f;;JF344019_g;JF344019_g_uc           | JF344019_g_uc | 0      | 0.073 |
| Bacteria;;Proteobacteria;;Deltaproteobacteria;;EU734972_o;;EU734972_f;;EU734972_g;EU734972_g_uc           | EU734972_g_uc | 0.0505 | 0     |
| Bacteria;;Proteobacteria;;Deltaproteobacteria;;EU734972_o;;EU734972_f;;EU734972_g;EU734972_s              | EU734972_s    | 0.0505 | 0     |
| Bacteria;;Proteobacteria;;Deltaproteobacteria;;FJ889281_o;;FJ889281_f;;FJ889281_g;FJ889281_g_uc           | FJ889281_g_uc | 0      | 0.024 |
| Bacteria;;Proteobacteria;;Deltaproteobacteria;;FM253572_o;;FM253572_f;;FM253572_f_uc;FM253572_f_uc_s      | FM253572_f_uc | 0.0505 | 0.17  |
| Bacteria;;Proteobacteria;;Deltaproteobacteria;;FM253572_o;;FM253572_o_uc;;FM253572_o_uc_g;FM253572_o_uc_s | FM253572_o_uc | 0.0168 | 0.073 |
| Bacteria;;Proteobacteria;;Deltaproteobacteria;;FM253572_o;;FM253606_f;;FM253606_f_uc;FM253606_f_uc_s      | FM253606_f_uc | 0      | 0.073 |
| Bacteria;;Proteobacteria;;Deltaproteobacteria;;FM253572_o;;FM253606_f;;HM799112_g;HM799112_g_uc           | HM799112_g_uc | 0      | 0.048 |
| Bacteria;;Proteobacteria;;Deltaproteobacteria;;FM253572_o;;GU208445_f;;GU208445_f_uc;GU208445_f_uc_s      | GU208445_f_uc | 0.0168 | 0.242 |
| Bacteria;;Proteobacteria;;Deltaproteobacteria;;GQ356959_o;;GQ356959_f;;GQ356959_f_uc;GQ356959_f_uc_s      | GQ356959_f_uc | 0.0337 | 0     |
| Bacteria;;Proteobacteria;;Deltaproteobacteria;;GQ356959_o;;GQ356959_f;;GQ356959_g;AB188771_s              | AB188771_s    | 0      | 0.048 |
| Bacteria;;Proteobacteria;;Deltaproteobacteria;;GQ356959_o;;GQ356959_f;;GQ356959_g;GQ356959_s              | GQ356959_s    | 0      | 0.024 |
| Bacteria;;Proteobacteria;;Deltaproteobacteria;;GQ433929_o;;GQ433929_f;;GQ433929_f_uc;GQ433929_f_uc_s      | GQ433929_f_uc | 0.0673 | 0     |
| Bacteria;;Proteobacteria;;Deltaproteobacteria;;GQ433929_o;;GQ433929_o_uc;;GQ433929_o_uc_g;GQ433929_o_uc_s | GQ433929_o_uc | 0.0168 | 0     |
| Bacteria;;Proteobacteria;;Deltaproteobacteria;;GU567808_o;;DQ394946_f;;DQ394946_f_uc;DQ394946_f_uc_s      | DQ394946_f_uc | 0.0168 | 0     |
| Bacteria;;Proteobacteria;;Deltaproteobacteria;;GU567808_o;;GU567808_f;;GU567808_f_uc;GU567808_f_uc_s      | GU567808_f_uc | 0      | 0.024 |
| Bacteria;;Proteobacteria;;Deltaproteobacteria;;HM243977_o;;DQ811827_f;;DQ463694_g;DQ463694_g_uc           | DQ463694_g_uc | 0.0168 | 0     |
| Bacteria;;Proteobacteria;;Deltaproteobacteria;;HM243977_o;;DQ811827_f;;DQ811827_f_uc;DQ811827_f_uc_s      | DQ811827_f_uc | 0.0168 | 0     |

|                                                                                                                        |                      |        |       |
|------------------------------------------------------------------------------------------------------------------------|----------------------|--------|-------|
| Bacteria;;;Proteobacteria;;Deltaproteobacteria;;HM243977_o;;DQ811827_f;;DQ811827_g;DQ811827_g_uc                       | DQ811827_g_uc        | 0.0841 | 0.024 |
| Bacteria;;;Proteobacteria;;Deltaproteobacteria;;HM243977_o;;DQ811827_f;;DQ811827_g;EF125419_s                          | EF125419_s           | 0.0168 | 0.024 |
| Bacteria;;;Proteobacteria;;Deltaproteobacteria;;K1932691_o;;EU245168_f;;EU245168_f_uc;EU245168_f_uc_s                  | EU245168_f_uc_s      | 0      | 0.024 |
| Bacteria;;;Proteobacteria;;Deltaproteobacteria;;K1932691_o;;EU245168_f;;FM242438_g;FM242438_g_uc                       | FM242438_g_uc        | 0      | 0.024 |
| Bacteria;;;Proteobacteria;;Deltaproteobacteria;;Myxococcales;;DQ833497_f;;DQ833497_f_uc;DQ833497_f_uc_s                | DQ833497_f_uc_s      | 0      | 0.024 |
| Bacteria;;;Proteobacteria;;Deltaproteobacteria;;Myxococcales;;EF125442_f;;EF125442_f_uc;EF125442_f_uc_s                | EF125442_f_uc_s      | 0      | 0.024 |
| Bacteria;;;Proteobacteria;;Deltaproteobacteria;;Myxococcales;;EU134529_f;;EU134529_f_uc;EU134529_f_uc_s                | EU134529_f_uc_s      | 0      | 0.073 |
| Bacteria;;;Proteobacteria;;Deltaproteobacteria;;Myxococcales;;EU246287_f;;EU246287_f_uc;EU246287_f_uc_s                | EU246287_f_uc_s      | 0.0168 | 0     |
| Bacteria;;;Proteobacteria;;Deltaproteobacteria;;Myxococcales;;EU589314_f;;EU589314_f_uc;EU589314_f_uc_s                | EU589314_f_uc_s      | 0      | 0.024 |
| Bacteria;;;Proteobacteria;;Deltaproteobacteria;;Myxococcales;;Haliangiaceae;;Haliangiaceae_uc;Haliangiaceae_uc_s       | Haliangiaceae_uc_s   | 0      | 0.048 |
| Bacteria;;;Proteobacteria;;Deltaproteobacteria;;Myxococcales;;Haliangiaceae;;Haliangium;Haliangium_uc                  | Haliangium_uc        | 0      | 0.024 |
| Bacteria;;;Proteobacteria;;Deltaproteobacteria;;Myxococcales;;JF344646_f;;JF344646_f_uc;JF344646_f_uc_s                | JF344646_f_uc_s      | 0      | 0.024 |
| Bacteria;;;Proteobacteria;;Deltaproteobacteria;;Myxococcales;;Myxococcales_uc;;Myxococcales_uc_g;Myxococcales_uc_s     | Myxococcales_uc_s    | 0.0505 | 0.048 |
| Bacteria;;;Proteobacteria;;Deltaproteobacteria;;Myxococcales;;Polyangiaceae;;Polyangiaceae_uc;Polyangiaceae_uc_s       | Polyangiaceae_uc_s   | 0.0168 | 0     |
| Bacteria;;;Proteobacteria;;Deltaproteobacteria;;Myxococcales;;Sandaracinaceae;;JF344203_g;4P002648_s                   | 4P002648_s           | 0.1682 | 0     |
| Bacteria;;;Proteobacteria;;Deltaproteobacteria;;Myxococcales;;Sandaracinaceae;;JF344203_g;4P003385_s                   | 4P003385_s           | 0      | 0.024 |
| Bacteria;;;Proteobacteria;;Deltaproteobacteria;;Myxococcales;;Sandaracinaceae;;JF344203_g;JF344203_g_uc                | JF344203_g_uc        | 0.5215 | 0.048 |
| Bacteria;;;Proteobacteria;;Deltaproteobacteria;;Myxococcales;;Sandaracinaceae;;JF344203_g;JF344203_s                   | JF344203_s           | 0.0505 | 0     |
| Bacteria;;;Proteobacteria;;Deltaproteobacteria;;Myxococcales;;Sandaracinaceae;;JF344203_g;JF344278_s                   | JF344278_s           | 0.0168 | 0     |
| Bacteria;;;Proteobacteria;;Deltaproteobacteria;;Myxococcales;;Sandaracinaceae;;JF344203_g;KC009893_s                   | KC009893_s           | 0      | 0.315 |
| Bacteria;;;Proteobacteria;;Deltaproteobacteria;;Myxococcales;;Sandaracinaceae;;Sandaracinaceae_uc;Sandaracinaceae_uc_s | Sandaracinaceae_uc_s | 0.0841 | 0     |
| Bacteria;;;Proteobacteria;;Deltaproteobacteria;;Nitrospinaceae_o;;DQ404777_f;;AB530226_g;AB530226_g_uc                 | AB530226_g_uc        | 0.0168 | 0.024 |
| Bacteria;;;Proteobacteria;;Deltaproteobacteria;;Nitrospinaceae_o;;DQ404777_f;;AB530226_g;AB530226_s                    | AB530226_s           | 0      | 0.024 |
| Bacteria;;;Proteobacteria;;Deltaproteobacteria;;Nitrospinaceae_o;;DQ404777_f;;AB530226_g;AY193132_s                    | AY193132_s           | 0      | 0.024 |
| Bacteria;;;Proteobacteria;;Deltaproteobacteria;;Nitrospinaceae_o;;DQ404777_f;;AB530226_g;AY592130_s                    | AY592130_s           | 0.0168 | 0     |
| Bacteria;;;Proteobacteria;;Deltaproteobacteria;;Nitrospinaceae_o;;DQ404777_f;;AB530226_g;AY592672_s                    | AY592672_s           | 0      | 0.048 |
| Bacteria;;;Proteobacteria;;Deltaproteobacteria;;Nitrospinaceae_o;;DQ404777_f;;AB530226_g;JX391675_s                    | JX391675_s           | 0      | 0.024 |
| Bacteria;;;Proteobacteria;;Deltaproteobacteria;;Nitrospinaceae_o;;DQ404777_f;;DQ404777_f_uc;DQ404777_f_uc_s            | DQ404777_f_uc_s      | 0.1009 | 0.048 |
| Bacteria;;;Proteobacteria;;Deltaproteobacteria;;Nitrospinaceae_o;;EU491271_f;;EU491271_f_uc;EU491271_f_uc_s            | EU491271_f_uc_s      | 0.0168 | 0     |
| Bacteria;;;Proteobacteria;;Deltaproteobacteria;;Nitrospinaceae_o;;FJ545464_f;;FJ545464_f_uc;FJ545464_f_uc_s            | FJ545464_f_uc_s      | 0.0168 | 0     |
| Bacteria;;;Proteobacteria;;Deltaproteobacteria;;Nitrospinaceae_o;;Nitrospinaceae;;AB015560_g;AM997732_s                | AM997732_s           | 0.0168 | 0     |

|                                                                                                                                               |                            |        |       |
|-----------------------------------------------------------------------------------------------------------------------------------------------|----------------------------|--------|-------|
| Bacteria;;Proteobacteria;;Deltaproteobacteria;;Nitrospinaceae_o;;Nitrospinaceae;;DQ513028_g;DQ513028_g_uc                                     | DQ513028_g_uc              | 0      | 0.024 |
| Bacteria;;Proteobacteria;;Deltaproteobacteria;;Nitrospinaceae_o;;Nitrospinaceae;;EU617741_g;AM997835_s                                        | AM997835_s                 | 0      | 0.097 |
| Bacteria;;Proteobacteria;;Deltaproteobacteria;;Nitrospinaceae_o;;Nitrospinaceae;;EU617741_g;EF999360_s                                        | EF999360_s                 | 0      | 0.024 |
| Bacteria;;Proteobacteria;;Deltaproteobacteria;;Nitrospinaceae_o;;Nitrospinaceae;;EU617741_g;EU617741_s                                        | EU617741_s                 | 0      | 0.073 |
| Bacteria;;Proteobacteria;;Deltaproteobacteria;;Nitrospinaceae_o;;Nitrospinaceae;;Nitrospinaceae_uc;Nitrospinaceae_uc_s                        | Nitrospinaceae_uc          | 0.0168 | 0.073 |
| Bacteria;;Proteobacteria;;Deltaproteobacteria;;Nitrospinaceae_o;;Nitrospinaceae_o_uc;;Nitrospinaceae_o_uc_g;Nitrospinaceae_o_uc_s             | Nitrospinaceae_o           | 0.0168 | 0.024 |
| Bacteria;;Proteobacteria;;Deltaproteobacteria;;Spirobacillus_o;;EU617864_f;;EU617864_f_uc;EU617864_f_uc_s                                     | EU617864_f_uc_s            | 0      | 0.121 |
| Bacteria;;Proteobacteria;;Deltaproteobacteria;;Syntrophobacterales;;DQ811814_f;;DQ811814_g;FM165234_s                                         | FM165234_s                 | 0      | 0.024 |
| Bacteria;;Proteobacteria;;Deltaproteobacteria;;Syntrophobacterales;;EU386119_f;;EU386119_f_uc;EU386119_f_uc_s                                 | EU386119_f_uc_s            | 0.0505 | 0     |
| Bacteria;;Proteobacteria;;Deltaproteobacteria;;Syntrophobacterales;;GQ246357_f;;GQ246357_f_uc;GQ246357_f_uc_s                                 | GQ246357_f_uc              | 0.0505 | 0.145 |
| Bacteria;;Proteobacteria;;Deltaproteobacteria;;Syntrophobacterales;;GQ246357_f;;GQ246357_g;GQ246357_g_uc                                      | GQ246357_g_uc              | 0.1346 | 0.848 |
| Bacteria;;Proteobacteria;;Deltaproteobacteria;;Syntrophobacterales;;GQ246357_f;;GQ246357_g;GQ246357_s                                         | GQ246357_s                 | 0.5215 | 0.194 |
| Bacteria;;Proteobacteria;;Deltaproteobacteria;;Syntrophobacterales;;Syntrophobacterales_uc;;Syntrophobacterales_uc_g;Syntrophobacterales_uc_s | Syntrophobacterales_uc     | 0      | 0.145 |
| Bacteria;;Proteobacteria;;Epsilonproteobacteria;;Campylobacterales;;Sulfurovum_f;;Sulfurovum;EF061977_s                                       | EF061977_s                 | 0      | 0.024 |
| Bacteria;;Proteobacteria;;Epsilonproteobacteria;;Campylobacterales;;Sulfurovum_f;;Sulfurovum;EF061978_s                                       | EF061978_s                 | 0      | 0.17  |
| Bacteria;;Proteobacteria;;Epsilonproteobacteria;;Campylobacterales;;Sulfurovum_f;;Sulfurovum;HQ203755_s                                       | HQ203755_s                 | 0      | 0.048 |
| Bacteria;;Proteobacteria;;Gammaproteobacteria;;Alteromonadales;;Ferrimonadaceae;;Ferrimonas;Ferrimonas balearica                              | Ferrimonas balearica       | 0      | 0.024 |
| Bacteria;;Proteobacteria;;Gammaproteobacteria;;Alteromonadales;;Marinobacter_f;;Marinobacter;AB089803_s                                       | AB089803_s                 | 0.0505 | 0     |
| Bacteria;;Proteobacteria;;Gammaproteobacteria;;Alteromonadales;;Microbulbifer_f;;Microbulbifer;Microbulbifer agarilyticus                     | Microbulbifer agarilyticus | 0      | 0.048 |
| Bacteria;;Proteobacteria;;Gammaproteobacteria;;Alteromonadales;;Psychromonadaceae;;Psychromonas;Psychromonas aquimarina                       | Psychromonas aquimarina    | 0      | 0.073 |
| Bacteria;;Proteobacteria;;Gammaproteobacteria;;Alteromonadales;;Psychromonadaceae;;Psychromonas;Psychromonas macrocephali                     | Psychromonas macrocephali  | 0      | 0.121 |
| Bacteria;;Proteobacteria;;Gammaproteobacteria;;Alteromonadales;;Psychromonadaceae;;Psychromonas;Psychromonas_uc                               | Psychromonas_uc            | 0      | 0.63  |
| Bacteria;;Proteobacteria;;Gammaproteobacteria;;Alteromonadales;;Shewanellaceae;;Shewanellaceae_uc;Shewanellaceae_uc_s                         | Shewanellaceae_uc          | 0      | 0.024 |
| Bacteria;;Proteobacteria;;Gammaproteobacteria;;Arenicella_o;;Arenicella_f;;Arenicella_f_uc;Arenicella_f_uc_s                                  | Arenicella_f_uc_s          | 0      | 0.097 |
| Bacteria;;Proteobacteria;;Gammaproteobacteria;;Arenicella_o;;Arenicella_f;;EU925907_g;EU925907_g_uc                                           | EU925907_g_uc              | 0      | 0.024 |
| Bacteria;;Proteobacteria;;Gammaproteobacteria;;Arenicella_o;;Arenicella_f;;EU925907_g;JN655438_s                                              | JN655438_s                 | 0      | 0.073 |
| Bacteria;;Proteobacteria;;Gammaproteobacteria;;Arenicella_o;;Arenicella_f;;EU925907_g;JN672661_s                                              | JN672661_s                 | 0      | 0.121 |
| Bacteria;;Proteobacteria;;Gammaproteobacteria;;Arenicella_o;;Arenicella_o_uc;;Arenicella_o_uc_g;Arenicella_o_uc_s                             | Arenicella_o_uc_s          | 0      | 0.024 |
| Bacteria;;Proteobacteria;;Gammaproteobacteria;;Arenicella_o;;HQ857665_f;;EU652576_g;EU652576_s                                                | EU652576_s                 | 0      | 0.048 |
| Bacteria;;Proteobacteria;;Gammaproteobacteria;;Arenicella_o;;HQ857665_f;;HQ857665_f_uc;HQ857665_f_uc_s                                        | HQ857665_f_uc_s            | 0.0168 | 0.388 |
| Bacteria;;Proteobacteria;;Gammaproteobacteria;;Arenicella_o;;HQ857665_f;;HQ857665_g;4P002695_s                                                | 4P002695_s                 | 0      | 0.073 |

|                                                                                                                                            |                    |        |       |
|--------------------------------------------------------------------------------------------------------------------------------------------|--------------------|--------|-------|
| Bacteria;;Proteobacteria;;Gammaproteobacteria;;Arenicella_o;;HQ857665_f;;HQ857665_g;AY592616_s                                             | AY592616_s         | 0      | 0.17  |
| Bacteria;;Proteobacteria;;Gammaproteobacteria;;Arenicella_o;;HQ857665_f;;HQ857665_g;FN396794_s                                             | FN396794_s         | 0      | 0.121 |
| Bacteria;;Proteobacteria;;Gammaproteobacteria;;Arenicella_o;;HQ857665_f;;HQ857665_g;GU119058_s                                             | GU119058_s         | 0      | 0.097 |
| Bacteria;;Proteobacteria;;Gammaproteobacteria;;Arenicella_o;;HQ857665_f;;HQ857665_g;HQ191003_s                                             | HQ191003_s         | 0      | 0.073 |
| Bacteria;;Proteobacteria;;Gammaproteobacteria;;Arenicella_o;;HQ857665_f;;HQ857665_g;HQ857665_g_uc                                          | HQ857665_g_uc      | 0.0168 | 0.679 |
| Bacteria;;Proteobacteria;;Gammaproteobacteria;;Arenicella_o;;HQ857665_f;;HQ857665_g;JF344291_s                                             | JF344291_s         | 0      | 0.024 |
| Bacteria;;Proteobacteria;;Gammaproteobacteria;;Chromatiales;;Acidiferrobacter_f;;Acidiferrobacter_f_uc;Acidiferrobacter_f_uc_s             | Acidiferrobacter_f | 0      | 0.17  |
| Bacteria;;Proteobacteria;;Gammaproteobacteria;;Chromatiales;;Acidiferrobacter_f;;EU491360_g;EU491360_g_uc                                  | EU491360_g_uc      | 0.0168 | 0.024 |
| Bacteria;;Proteobacteria;;Gammaproteobacteria;;Chromatiales;;AJ966605_f;;AJ966605_f_uc;AJ966605_f_uc_s                                     | AJ966605_f_uc_s    | 0.0337 | 0.073 |
| Bacteria;;Proteobacteria;;Gammaproteobacteria;;Chromatiales;;AJ966605_f;;AJ966605_g;AJ966605_g_uc                                          | AJ966605_g_uc      | 0      | 0.194 |
| Bacteria;;Proteobacteria;;Gammaproteobacteria;;Chromatiales;;AJ966605_f;;AJ966605_g;EU652571_s                                             | EU652571_s         | 0.1178 | 0.436 |
| Bacteria;;Proteobacteria;;Gammaproteobacteria;;Chromatiales;;AJ966605_f;;AJ966605_g;FJ905747_s                                             | FJ905747_s         | 0      | 0.024 |
| Bacteria;;Proteobacteria;;Gammaproteobacteria;;Chromatiales;;AJ966605_f;;AJ966605_g;GQ246308_s                                             | GQ246308_s         | 0      | 0.048 |
| Bacteria;;Proteobacteria;;Gammaproteobacteria;;Chromatiales;;Chromatiaceae;;Chromatiaceae_uc;Chromatiaceae_uc_s                            | Chromatiaceae_uc   | 0.0168 | 0.242 |
| Bacteria;;Proteobacteria;;Gammaproteobacteria;;Chromatiales;;DQ009140_f;;DQ009140_f_uc;DQ009140_f_uc_s                                     | DQ009140_f_uc      | 0      | 0.073 |
| Bacteria;;Proteobacteria;;Gammaproteobacteria;;Chromatiales;;Ectothiorhodospiraceae;;Ectothiorhodospiraceae_uc;Ectothiorhodospiraceae_uc_s | Ectothiorhodospir  | 0.1851 | 0.024 |
| Bacteria;;Proteobacteria;;Gammaproteobacteria;;Chromatiales;;Ectothiorhodospiraceae;;EU617748_g;EU617748_s                                 | EU617748_s         | 0      | 0.097 |
| Bacteria;;Proteobacteria;;Gammaproteobacteria;;Chromatiales;;Ectothiorhodospiraceae;;Thioalkalivibrio;Thioalkalivibrio_uc                  | Thioalkalivibrio_u | 0.0168 | 0.024 |
| Bacteria;;Proteobacteria;;Gammaproteobacteria;;Chromatiales;;EU753674_f;;EU753674_f_uc;EU753674_f_uc_s                                     | EU753674_f_uc_s    | 0      | 0.073 |
| Bacteria;;Proteobacteria;;Gammaproteobacteria;;Chromatiales;;FJ712598_f;;FJ545561_g;FJ545561_g_uc                                          | FJ545561_g_uc      | 0      | 0.461 |
| Bacteria;;Proteobacteria;;Gammaproteobacteria;;Chromatiales;;FJ712598_f;;FJ712598_f_uc;FJ712598_f_uc_s                                     | FJ712598_f_uc_s    | 0      | 0.024 |
| Bacteria;;Proteobacteria;;Gammaproteobacteria;;Chromatiales;;FJ712598_f;;FJ712598_g;FJ712598_g_uc                                          | FJ712598_g_uc      | 0      | 0.024 |
| Bacteria;;Proteobacteria;;Gammaproteobacteria;;Chromatiales;;FM179879_f;;EU491810_g;EU491810_g_uc                                          | EU491810_g_uc      | 0      | 0.024 |
| Bacteria;;Proteobacteria;;Gammaproteobacteria;;Chromatiales;;FM179879_f;;FM179879_g;FJ905698_s                                             | FJ905698_s         | 0      | 0.048 |
| Bacteria;;Proteobacteria;;Gammaproteobacteria;;Chromatiales;;FM242209_f;;FM242209_f_uc;FM242209_f_uc_s                                     | FM242209_f_uc      | 0      | 0.048 |
| Bacteria;;Proteobacteria;;Gammaproteobacteria;;Chromatiales;;FR670376_f;;FR670376_f_uc;FR670376_f_uc_s                                     | FR670376_f_uc_s    | 0      | 0.242 |
| Bacteria;;Proteobacteria;;Gammaproteobacteria;;Chromatiales;;FR670376_f;;FR670376_g;FR670376_g_uc                                          | FR670376_g_uc      | 0      | 0.194 |
| Bacteria;;Proteobacteria;;Gammaproteobacteria;;Chromatiales;;FR670376_f;;FR670376_g;HQ191015_s                                             | HQ191015_s         | 0      | 0.024 |
| Bacteria;;Proteobacteria;;Gammaproteobacteria;;Chromatiales;;FR670376_f;;GQ246321_g;AB530210_s                                             | AB530210_s         | 0      | 0.121 |
| Bacteria;;Proteobacteria;;Gammaproteobacteria;;Chromatiales;;FR670376_f;;GQ246321_g;GQ246321_g_uc                                          | GQ246321_g_uc      | 0      | 0.121 |
| Bacteria;;Proteobacteria;;Gammaproteobacteria;;Chromatiales;;Nitrococcus_f;;Nitrococcus_f_uc;Nitrococcus_f_uc_s                            | Nitrococcus_f_uc   | 0      | 0.073 |

|                                                                                                                                                     |                                   |        |       |
|-----------------------------------------------------------------------------------------------------------------------------------------------------|-----------------------------------|--------|-------|
| Bacteria;;Proteobacteria;;Gammaproteobacteria;;Chromatiales;;Sedimenticola_f;;Endoriftia;Endoriftia_uc                                              | Endoriftia_uc                     | 0      | 0.073 |
| Bacteria;;Proteobacteria;;Gammaproteobacteria;;Chromatiales;;Sedimenticola_f;;Sedimenticola_f_uc;;Sedimenticola_f_uc_s                              | Sedimenticola_f_uc                | 0.0168 | 0     |
| Bacteria;;Proteobacteria;;Gammaproteobacteria;;Chromatiales;;Thioalkalispiraceae;;Thioalkalispiraceae_uc;;Thioalkalispiraceae_uc_s                  | Thioalkalispiraceae_uc            | 0.1009 | 0     |
| Bacteria;;Proteobacteria;;Gammaproteobacteria;;Chromatiales;;Thiohalomonas_f;;Thiohalomonas_f_uc;;Thiohalomonas_f_uc_s                              | Thiohalomonas_f_uc                | 0      | 0.024 |
| Bacteria;;Proteobacteria;;Gammaproteobacteria;;Chromatiales;;Thiohalophilus_f;;Thiohalophilus_f_uc;;Thiohalophilus_f_uc_s                           | Thiohalophilus_f_uc               | 0.0505 | 0.024 |
| Bacteria;;Proteobacteria;;Gammaproteobacteria;;Chromatiales;;Thiohalophilus_f;;Thiopfundum;Thiopfundum_uc                                           | Thiopfundum_uc                    | 0      | 0.024 |
| Bacteria;;Proteobacteria;;Gammaproteobacteria;;DQ906757_o;;DQ906757_f;;DQ906757_g;;DQ906757_g_uc                                                    | DQ906757_g_uc                     | 0      | 0.024 |
| Bacteria;;Proteobacteria;;Gammaproteobacteria;;DQ906757_o;;DQ906757_f;;DQ906757_g;;EF061964_s                                                       | EF061964_s                        | 0      | 0.048 |
| Bacteria;;Proteobacteria;;Gammaproteobacteria;;DQ906757_o;;DQ906757_f;;DQ906757_g;;GU061230_s                                                       | GU061230_s                        | 0.0673 | 0     |
| Bacteria;;Proteobacteria;;Gammaproteobacteria;;DQ906757_o;;DQ906757_f;;DQ906757_g;;sym_Olavius_algarvensis_s                                        | sym_Olavius_algarvensis_s         | 0.0337 | 0     |
| Bacteria;;Proteobacteria;;Gammaproteobacteria;;EF573277_o;;EF573277_f;;EF573277_f_uc;;EF573277_f_uc_s                                               | EF573277_f_uc_s                   | 0.0168 | 0.364 |
| Bacteria;;Proteobacteria;;Gammaproteobacteria;;EF573277_o;;EF573277_f;;EU287155_g;;EU287155_g_uc                                                    | EU287155_g_uc                     | 0      | 0.461 |
| Bacteria;;Proteobacteria;;Gammaproteobacteria;;EF573277_o;;EF573277_f;;FM242299_g;;FM242299_g_uc                                                    | FM242299_g_uc                     | 0      | 0.145 |
| Bacteria;;Proteobacteria;;Gammaproteobacteria;;EF573277_o;;EU979089_f;;EU979089_f_uc;;EU979089_f_uc_s                                               | EU979089_f_uc_s                   | 0      | 0.121 |
| Bacteria;;Proteobacteria;;Gammaproteobacteria;;EF573277_o;;EU979089_f;;EU979089_g;;EU979089_g_uc                                                    | EU979089_g_uc                     | 0      | 0.024 |
| Bacteria;;Proteobacteria;;Gammaproteobacteria;;EU287122_o;;EU287122_f;;EU287122_f_uc;;EU287122_f_uc_s                                               | EU287122_f_uc_s                   | 0      | 0.024 |
| Bacteria;;Proteobacteria;;Gammaproteobacteria;;FN820314_o;;FN820314_f;;FN820314_f_uc;;FN820314_f_uc_s                                               | FN820314_f_uc_s                   | 0      | 0.024 |
| Bacteria;;Proteobacteria;;Gammaproteobacteria;;Gammaproteobacteria_uc;;Gammaproteobacteria_uc_f;;Gammaproteobacteria_uc_g;;Gammaproteobacteria_uc_s | Gammaproteobacteria_uc            | 0.0168 | 0.048 |
| Bacteria;;Proteobacteria;;Gammaproteobacteria;;HQ191045_o;;HQ191045_f;;FJ545575_g;;FJ545575_g_uc                                                    | FJ545575_g_uc                     | 0      | 0.267 |
| Bacteria;;Proteobacteria;;Gammaproteobacteria;;HQ191059_o;;HQ191059_o_uc;;HQ191059_o_uc_g;;HQ191059_o_uc_s                                          | HQ191059_o_uc_s                   | 0      | 0.024 |
| Bacteria;;Proteobacteria;;Gammaproteobacteria;;Ignatzschineria_o;;Plasticicumulans_f;;Plasticicumulans_f_uc;;Plasticicumulans_f_uc_s                | Plasticicumulans_f_uc             | 0      | 0.121 |
| Bacteria;;Proteobacteria;;Gammaproteobacteria;;Legionellales;;Coxiellaceae;;Coxiella;Coxiella_uc                                                    | Coxiella_uc                       | 0.0168 | 0.145 |
| Bacteria;;Proteobacteria;;Gammaproteobacteria;;Legionellales;;Coxiellaceae;;Coxiella;DQ889919_s                                                     | DQ889919_s                        | 0      | 0.048 |
| Bacteria;;Proteobacteria;;Gammaproteobacteria;;Legionellales;;Coxiellaceae;;Coxiella;EU386125_s                                                     | EU386125_s                        | 0      | 0.073 |
| Bacteria;;Proteobacteria;;Gammaproteobacteria;;Legionellales;;Coxiellaceae;;Coxiella;sym_Heterocapsa_circularisquama_s                              | sym_Heterocapsa_circularisquama_s | 0      | 0.073 |
| Bacteria;;Proteobacteria;;Gammaproteobacteria;;Legionellales;;Coxiellaceae;;Coxiellaceae_uc;;Coxiellaceae_uc_s                                      | Coxiellaceae_uc_s                 | 0.1009 | 1.018 |
| Bacteria;;Proteobacteria;;Gammaproteobacteria;;Legionellales;;Coxiellaceae;;EF492925_g;;EF492925_g_uc                                               | EF492925_g_uc                     | 0      | 0.048 |
| Bacteria;;Proteobacteria;;Gammaproteobacteria;;Legionellales;;Coxiellaceae;;EU802753_g;;EU802753_g_uc                                               | EU802753_g_uc                     | 0      | 0.024 |
| Bacteria;;Proteobacteria;;Gammaproteobacteria;;Legionellales;;Coxiellaceae;;FJ437785_g;;FJ437785_g_uc                                               | FJ437785_g_uc                     | 0      | 0.024 |
| Bacteria;;Proteobacteria;;Gammaproteobacteria;;Legionellales;;DQ337099_f;;DQ337099_f_uc;;DQ337099_f_uc_s                                            | DQ337099_f_uc_s                   | 0      | 0.073 |
| Bacteria;;Proteobacteria;;Gammaproteobacteria;;Legionellales;;EU491871_f;;EU491871_f_uc;;EU491871_f_uc_s                                            | EU491871_f_uc_s                   | 0      | 0.024 |



|                                                                                                                                       |                     |        |       |
|---------------------------------------------------------------------------------------------------------------------------------------|---------------------|--------|-------|
| Bacteria;;Proteobacteria;;Gammaproteobacteria;;Legionellales;;EU491871_f;;EU491871_g;EU491871_s                                       | EU491871_s          | 0      | 0.048 |
| Bacteria;;Proteobacteria;;Gammaproteobacteria;;Legionellales;;Legionellaceae;;Legionella;HM798974_s                                   | HM798974_s          | 0      | 0.024 |
| Bacteria;;Proteobacteria;;Gammaproteobacteria;;Legionellales;;Legionellaceae;;Legionella;JN530139_s                                   | JN530139_s          | 0      | 0.024 |
| Bacteria;;Proteobacteria;;Gammaproteobacteria;;Legionellales;;Legionellaceae;;Legionella;Legionella_uc                                | Legionella_uc       | 0      | 0.097 |
| Bacteria;;Proteobacteria;;Gammaproteobacteria;;Legionellales;;Legionellaceae;;Legionellaceae_uc;;Legionellaceae_uc_s                  | Legionellaceae_uc   | 0.0337 | 0.339 |
| Bacteria;;Proteobacteria;;Gammaproteobacteria;;Legionellales;;Legionellales_uc;;Legionellales_uc_g;Legionellales_uc_s                 | Legionellales_uc    | 0      | 0.097 |
| Bacteria;;Proteobacteria;;Gammaproteobacteria;;M90415_o;;AY532574_f;;AY532574_f_uc;AY532574_f_uc_s                                    | AY532574_f_uc       | 0.0505 | 0     |
| Bacteria;;Proteobacteria;;Gammaproteobacteria;;M90415_o;;AY532574_f;;AY532574_g;AY532574_g_uc                                         | AY532574_g_uc       | 1.0262 | 0     |
| Bacteria;;Proteobacteria;;Gammaproteobacteria;;Marinicella_o;;AB015252_f;;AB015252_f_uc;AB015252_f_uc_s                               | AB015252_f_uc       | 0      | 0.121 |
| Bacteria;;Proteobacteria;;Gammaproteobacteria;;Marinicella_o;;AB015252_f;;AB015252_g;4P002563_s                                       | 4P002563_s          | 0      | 0.073 |
| Bacteria;;Proteobacteria;;Gammaproteobacteria;;Marinicella_o;;AB015252_f;;AB015252_g;AB015252_g_uc                                    | AB015252_g_uc       | 0      | 0.242 |
| Bacteria;;Proteobacteria;;Gammaproteobacteria;;Marinicella_o;;AB015252_f;;AB015252_g;GU117976_s                                       | GU117976_s          | 0      | 0.024 |
| Bacteria;;Proteobacteria;;Gammaproteobacteria;;Marinicella_o;;AB015252_f;;EU734943_g;4P005770_s                                       | 4P005770_s          | 0      | 0.048 |
| Bacteria;;Proteobacteria;;Gammaproteobacteria;;Marinicella_o;;AB015252_f;;EU734943_g;DQ394908_s                                       | DQ394908_s          | 0      | 0.097 |
| Bacteria;;Proteobacteria;;Gammaproteobacteria;;Marinicella_o;;AB015252_f;;EU734943_g;EU617751_s                                       | EU617751_s          | 0      | 0.218 |
| Bacteria;;Proteobacteria;;Gammaproteobacteria;;Marinicella_o;;AB015252_f;;EU734943_g;EU734943_g_uc                                    | EU734943_g_uc       | 0      | 0.315 |
| Bacteria;;Proteobacteria;;Gammaproteobacteria;;Marinicella_o;;AB015252_f;;EU734943_g;JQ925121_s                                       | JQ925121_s          | 0      | 0.024 |
| Bacteria;;Proteobacteria;;Gammaproteobacteria;;Methylococcales;;Methylococcaceae;;Methylococcaceae_uc;Methylococcaceae_uc_s           | Methylococcaceae    | 0      | 0.024 |
| Bacteria;;Proteobacteria;;Gammaproteobacteria;;Oceanospirillales;;Alcanivoracaceae;;Alcanivoracaceae_uc;Alcanivoracaceae_uc_s         | Alcanivoracaceae    | 0.0673 | 0     |
| Bacteria;;Proteobacteria;;Gammaproteobacteria;;Oceanospirillales;;Alcanivoracaceae;;Alcanivorax;Alcanivorax venustensis               | Alcanivorax venus   | 3.8022 | 0     |
| Bacteria;;Proteobacteria;;Gammaproteobacteria;;Oceanospirillales;;Alcanivoracaceae;;Alcanivorax;Alcanivorax_uc                        | Alcanivorax_uc      | 0.0337 | 0     |
| Bacteria;;Proteobacteria;;Gammaproteobacteria;;Oceanospirillales;;Halomonadaceae;;Salinicola;Salinicola salarius                      | Salinicola salarius | 0.0168 | 0     |
| Bacteria;;Proteobacteria;;Gammaproteobacteria;;Oceanospirillales;;Oceanospirillaceae;;Amphritea;Amphritea_uc                          | Amphritea_uc        | 8.6642 | 0     |
| Bacteria;;Proteobacteria;;Gammaproteobacteria;;Oceanospirillales;;Oceanospirillaceae;;Marinobacterium;GU119170_s                      | GU119170_s          | 0      | 0.024 |
| Bacteria;;Proteobacteria;;Gammaproteobacteria;;Oceanospirillales;;Oceanospirillaceae;;Marinobacterium;Marinobacterium_uc              | Marinobacterium     | 0.0168 | 0     |
| Bacteria;;Proteobacteria;;Gammaproteobacteria;;Oceanospirillales;;Oceanospirillaceae;;Oceanospirillaceae_uc;Oceanospirillaceae_uc_s   | Oceanospirillaceae  | 0.4879 | 0     |
| Bacteria;;Proteobacteria;;Gammaproteobacteria;;Oceanospirillales;;Oceanospirillales_uc;;Oceanospirillales_uc_g;Oceanospirillales_uc_s | Oceanospirillales   | 0.0337 | 0.024 |
| Bacteria;;Proteobacteria;;Gammaproteobacteria;;Oceanospirillales;;Zooshikella_f;;Zooshikella_f_uc;Zooshikella_f_uc_s                  | Zooshikella_f_uc    | 0.0337 | 0.024 |
| Bacteria;;Proteobacteria;;Gammaproteobacteria;;OM182_o;;GU474872_f;;GU474872_g;GU474872_g_uc                                          | GU474872_g_uc       | 0      | 0.024 |
| Bacteria;;Proteobacteria;;Gammaproteobacteria;;OM182_o;;OM182_f;;OM182_f_uc;OM182_f_uc_s                                              | OM182_f_uc_s        | 0.0337 | 0     |
| Bacteria;;Proteobacteria;;Gammaproteobacteria;;OM60_o;;DQ395870_f;;DQ395870_g;4P003245_s                                              | 4P003245_s          | 0      | 0.024 |

|                                                                                                                           |                   |        |       |
|---------------------------------------------------------------------------------------------------------------------------|-------------------|--------|-------|
| Bacteria;;;Proteobacteria;;Gammaproteobacteria;;OM60_o;;GQ274159_f;;GQ274159_f_uc;GQ274159_f_uc_s                         | GQ274159_f_uc_    | 0      | 0.024 |
| Bacteria;;;Proteobacteria;;Gammaproteobacteria;;OM60_o;;GQ274159_f;;GQ274159_g;GQ274159_g_uc                              | GQ274159_g_uc     | 0      | 0.024 |
| Bacteria;;;Proteobacteria;;Gammaproteobacteria;;OM60_o;;IMCC2047_f;;IMCC2047_g;EU287134_s                                 | EU287134_s        | 0.0168 | 0     |
| Bacteria;;;Proteobacteria;;Gammaproteobacteria;;OM60_o;;OM60_f;;AB294932_g;AB294932_g_uc                                  | AB294932_g_uc     | 0      | 0.024 |
| Bacteria;;;Proteobacteria;;Gammaproteobacteria;;OM60_o;;OM60_f;;EF061963_g;EF061963_g_uc                                  | EF061963_g_uc     | 0      | 0.024 |
| Bacteria;;;Proteobacteria;;Gammaproteobacteria;;OM60_o;;OM60_f;;EU394576_g;EU394576_g_uc                                  | EU394576_g_uc     | 0      | 0.073 |
| Bacteria;;;Proteobacteria;;Gammaproteobacteria;;OM60_o;;OM60_f;;EU394576_g;FJ425618_s                                     | FJ425618_s        | 0      | 0.024 |
| Bacteria;;;Proteobacteria;;Gammaproteobacteria;;OM60_o;;OM60_f;;NOR5-11_g;NOR5-11_g_uc                                    | NOR5-11_g_uc      | 0      | 0.024 |
| Bacteria;;;Proteobacteria;;Gammaproteobacteria;;OM60_o;;OM60_f;;NOR5-5_g;JF344009_s                                       | JF344009_s        | 0      | 0.024 |
| Bacteria;;;Proteobacteria;;Gammaproteobacteria;;OM60_o;;OM60_f;;NOR5-5_g;NOR5-5_g_uc                                      | NOR5-5_g_uc       | 0      | 0.024 |
| Bacteria;;;Proteobacteria;;Gammaproteobacteria;;OM60_o;;OM60_f;;NOR5-9_g;EU700144_s                                       | EU700144_s        | 0      | 0.194 |
| Bacteria;;;Proteobacteria;;Gammaproteobacteria;;OM60_o;;OM60_f;;OM60_f_uc;OM60_f_uc_s                                     | OM60_f_uc_s       | 0      | 0.121 |
| Bacteria;;;Proteobacteria;;Gammaproteobacteria;;Spongiibacter_o;;Spongiibacter_f;;Spongiibacter_f_uc;Spongiibacter_f_uc_s | Spongiibacter_f_u | 0      | 0.024 |
| Bacteria;;;Proteobacteria;;Gammaproteobacteria;;Steroidobacter_o;;AB013829_f;;AB013829_f_uc;AB013829_f_uc_s               | AB013829_f_uc_    | 0.0841 | 1.188 |
| Bacteria;;;Proteobacteria;;Gammaproteobacteria;;Steroidobacter_o;;AB013829_f;;AB013829_g;4P003077_s                       | 4P003077_s        | 0      | 0.509 |
| Bacteria;;;Proteobacteria;;Gammaproteobacteria;;Steroidobacter_o;;AB013829_f;;AB013829_g;AB013829_g_uc                    | AB013829_g_uc     | 0.1009 | 2.352 |
| Bacteria;;;Proteobacteria;;Gammaproteobacteria;;Steroidobacter_o;;AB013829_f;;AB013829_g;AB013829_s                       | AB013829_s        | 0.0337 | 0     |
| Bacteria;;;Proteobacteria;;Gammaproteobacteria;;Steroidobacter_o;;AB013829_f;;AB013829_g;AB294966_s                       | AB294966_s        | 0      | 0.073 |
| Bacteria;;;Proteobacteria;;Gammaproteobacteria;;Steroidobacter_o;;AB013829_f;;AB013829_g;AM040131_s                       | AM040131_s        | 0.0337 | 0.024 |
| Bacteria;;;Proteobacteria;;Gammaproteobacteria;;Steroidobacter_o;;AB013829_f;;AB013829_g;AM882569_s                       | AM882569_s        | 0      | 0.121 |
| Bacteria;;;Proteobacteria;;Gammaproteobacteria;;Steroidobacter_o;;AB013829_f;;AB013829_g;AM889178_s                       | AM889178_s        | 0      | 0.63  |
| Bacteria;;;Proteobacteria;;Gammaproteobacteria;;Steroidobacter_o;;AB013829_f;;AB013829_g;DQ811838_s                       | DQ811838_s        | 0.0168 | 0.436 |
| Bacteria;;;Proteobacteria;;Gammaproteobacteria;;Steroidobacter_o;;AB013829_f;;AB013829_g;EU287173_s                       | EU287173_s        | 0      | 0.073 |
| Bacteria;;;Proteobacteria;;Gammaproteobacteria;;Steroidobacter_o;;AB013829_f;;AB013829_g;EU287247_s                       | EU287247_s        | 0      | 0.024 |
| Bacteria;;;Proteobacteria;;Gammaproteobacteria;;Steroidobacter_o;;AB013829_f;;AB013829_g;EU491415_s                       | EU491415_s        | 0      | 0.024 |
| Bacteria;;;Proteobacteria;;Gammaproteobacteria;;Steroidobacter_o;;AB013829_f;;AB013829_g;EU491466_s                       | EU491466_s        | 0      | 0.024 |
| Bacteria;;;Proteobacteria;;Gammaproteobacteria;;Steroidobacter_o;;AB013829_f;;AB013829_g;EU617758_s                       | EU617758_s        | 0      | 0.752 |
| Bacteria;;;Proteobacteria;;Gammaproteobacteria;;Steroidobacter_o;;AB013829_f;;AB013829_g;EU652521_s                       | EU652521_s        | 0      | 1.624 |
| Bacteria;;;Proteobacteria;;Gammaproteobacteria;;Steroidobacter_o;;AB013829_f;;AB013829_g;EU652523_s                       | EU652523_s        | 0      | 0.364 |
| Bacteria;;;Proteobacteria;;Gammaproteobacteria;;Steroidobacter_o;;AB013829_f;;AB013829_g;EU652524_s                       | EU652524_s        | 0      | 0.194 |
| Bacteria;;;Proteobacteria;;Gammaproteobacteria;;Steroidobacter_o;;AB013829_f;;AB013829_g;FJ202524_s                       | FJ202524_s        | 0      | 0.048 |
| Bacteria;;;Proteobacteria;;Gammaproteobacteria;;Steroidobacter_o;;AB013829_f;;AB013829_g;FJ545556_s                       | FJ545556_s        | 0      | 0.024 |

|                                                                                                                                    |                   |        |       |
|------------------------------------------------------------------------------------------------------------------------------------|-------------------|--------|-------|
| Bacteria;;;Proteobacteria;;Gammaproteobacteria;;Steroidobacter_o;;AB013829_f;;AB013829_g;FJ748779_s                                | FJ748779_s        | 0      | 0.024 |
| Bacteria;;;Proteobacteria;;Gammaproteobacteria;;Steroidobacter_o;;AB013829_f;;AB013829_g;FM211757_s                                | FM211757_s        | 0      | 0.558 |
| Bacteria;;;Proteobacteria;;Gammaproteobacteria;;Steroidobacter_o;;AB013829_f;;AB013829_g;GU118022_s                                | GU118022_s        | 0      | 0.121 |
| Bacteria;;;Proteobacteria;;Gammaproteobacteria;;Steroidobacter_o;;AB013829_f;;AB013829_g;GU118029_s                                | GU118029_s        | 0      | 0.121 |
| Bacteria;;;Proteobacteria;;Gammaproteobacteria;;Steroidobacter_o;;AB013829_f;;AB013829_g;GU230338_s                                | GU230338_s        | 0.0168 | 0.218 |
| Bacteria;;;Proteobacteria;;Gammaproteobacteria;;Steroidobacter_o;;AB013829_f;;AB013829_g;HQ191028_s                                | HQ191028_s        | 0.0505 | 0.218 |
| Bacteria;;;Proteobacteria;;Gammaproteobacteria;;Steroidobacter_o;;AB013829_f;;AB013829_g;JF344094_s                                | JF344094_s        | 0      | 0.242 |
| Bacteria;;;Proteobacteria;;Gammaproteobacteria;;Steroidobacter_o;;AB013829_f;;AB013829_g;JF344416_s                                | JF344416_s        | 0      | 0.145 |
| Bacteria;;;Proteobacteria;;Gammaproteobacteria;;Steroidobacter_o;;AB013829_f;;AB013829_g;JF344486_s                                | JF344486_s        | 0      | 0.121 |
| Bacteria;;;Proteobacteria;;Gammaproteobacteria;;Steroidobacter_o;;AB013829_f;;AB013829_g;JN166335_s                                | JN166335_s        | 0.0337 | 0.024 |
| Bacteria;;;Proteobacteria;;Gammaproteobacteria;;Steroidobacter_o;;AB013829_f;;AB013829_g;JN977186_s                                | JN977186_s        | 0      | 0.121 |
| Bacteria;;;Proteobacteria;;Gammaproteobacteria;;Steroidobacter_o;;AB013829_f;;AB013829_g;JQ347364_s                                | JQ347364_s        | 0.0168 | 0.097 |
| Bacteria;;;Proteobacteria;;Gammaproteobacteria;;Steroidobacter_o;;AB013829_f;;AM997777_g;AM997777_g_uc                             | AM997777_g_uc     | 0.0168 | 0.048 |
| Bacteria;;;Proteobacteria;;Gammaproteobacteria;;Steroidobacter_o;;AB013829_f;;AM997777_g;AM997777_s                                | AM997777_s        | 0      | 0.024 |
| Bacteria;;;Proteobacteria;;Gammaproteobacteria;;Steroidobacter_o;;AB013829_f;;AM997777_g;HQ727616_s                                | HQ727616_s        | 0      | 0.097 |
| Bacteria;;;Proteobacteria;;Gammaproteobacteria;;Steroidobacter_o;;AB013829_f;;AM997777_g;JX138745_s                                | JX138745_s        | 0      | 0.048 |
| Bacteria;;;Proteobacteria;;Gammaproteobacteria;;Steroidobacter_o;;AB013829_f;;AM997923_g;AM997923_g_uc                             | AM997923_g_uc     | 0      | 0.024 |
| Bacteria;;;Proteobacteria;;Gammaproteobacteria;;Steroidobacter_o;;AB013829_f;;DQ351802_g;DQ351802_g_uc                             | DQ351802_g_uc     | 0      | 0.412 |
| Bacteria;;;Proteobacteria;;Gammaproteobacteria;;Steroidobacter_o;;AB013829_f;;DQ351802_g;DQ351802_s                                | DQ351802_s        | 0      | 0.339 |
| Bacteria;;;Proteobacteria;;Gammaproteobacteria;;Steroidobacter_o;;AB013829_f;;DQ351802_g;EU287158_s                                | EU287158_s        | 0.0168 | 0.048 |
| Bacteria;;;Proteobacteria;;Gammaproteobacteria;;Steroidobacter_o;;AB013829_f;;EU734940_g;EU617769_s                                | EU617769_s        | 0      | 0.073 |
| Bacteria;;;Proteobacteria;;Gammaproteobacteria;;Steroidobacter_o;;AB013829_f;;EU734940_g;EU734940_g_uc                             | EU734940_g_uc     | 0      | 0.024 |
| Bacteria;;;Proteobacteria;;Gammaproteobacteria;;Steroidobacter_o;;AB013829_f;;FJ264749_g;4P002718_s                                | 4P002718_s        | 0      | 0.121 |
| Bacteria;;;Proteobacteria;;Gammaproteobacteria;;Steroidobacter_o;;AB013829_f;;FJ264749_g;FJ264749_g_uc                             | FJ264749_g_uc     | 0      | 0.218 |
| Bacteria;;;Proteobacteria;;Gammaproteobacteria;;Steroidobacter_o;;Steroidobacter_o_uc;;Steroidobacter_o_uc_g;Steroidobacter_o_uc_s | Steroidobacter_o  | 0      | 0.024 |
| Bacteria;;;Proteobacteria;;Gammaproteobacteria;;Thiotrichales;;Beggiatoaceae;;Beggiatoaceae_uc;;Beggiatoaceae_uc_s                 | Beggiatoaceae_uc  | 0.0505 | 0     |
| Bacteria;;;Proteobacteria;;Gammaproteobacteria;;Thiotrichales;;Methylophaga_f;;Methylophaga_f_uc;;Methylophaga_f_uc_s              | Methylophaga_f    | 0      | 0.073 |
| Bacteria;;;Proteobacteria;;Gammaproteobacteria;;Vibrionales;;Vibrionaceae;;Photobacterium;Photobacterium frigidiphilum             | Photobacterium fr | 0.0337 | 0     |
| Bacteria;;;Proteobacteria;;Gammaproteobacteria;;Vibrionales;;Vibrionaceae;;Photobacterium;Photobacterium indicum                   | Photobacterium in | 2.4226 | 0     |
| Bacteria;;;Proteobacteria;;Gammaproteobacteria;;Vibrionales;;Vibrionaceae;;Photobacterium;Photobacterium lipolyticum               | Photobacterium li | 0.2524 | 0     |
| Bacteria;;;Proteobacteria;;Gammaproteobacteria;;Vibrionales;;Vibrionaceae;;Photobacterium;Photobacterium_uc                        | Photobacterium_u  | 0.0505 | 0     |

|                                                                                                                                |                   |        |       |
|--------------------------------------------------------------------------------------------------------------------------------|-------------------|--------|-------|
| Bacteria;;Proteobacteria;;Gammaproteobacteria;;Vibrionales;;Vibrionaceae;;Vibrio;Catenococcus thiocyli                         | Catenococcus thio | 0      | 0.024 |
| Bacteria;;Proteobacteria;;Gammaproteobacteria;;Vibrionales;;Vibrionaceae;;Vibrionaceae_uc;Vibrionaceae_uc_s                    | Vibrionaceae_uc   | 0.0505 | 0     |
| Bacteria;;Proteobacteria;;Proteobacteria_uc;;Proteobacteria_uc_o;;Proteobacteria_uc_f;;Proteobacteria_uc_g;Proteobacteria_uc_s | Proteobacteria_uc | 0      | 0.024 |
| Bacteria;;SAR406;;SAR406_c;;AJ347757_o;;FJ716276_f;;FJ716276_f_uc;FJ716276_f_uc_s                                              | FJ716276_f_uc_s   | 0      | 0.024 |
| Bacteria;;Spirochaetes;;Spirochaetes_c;;Spirochaetales;;EU290731_f;;EU290731_g;EU290731_g_uc                                   | EU290731_g_uc     | 0.0168 | 0.024 |
| Bacteria;;Spirochaetes;;Spirochaetes_c;;Spirochaetales;;Leptosiraceae;;Leptonema;Leptonema_u_c                                 | Leptonema_uc      | 0      | 0.024 |
| Bacteria;;Spirochaetes;;Spirochaetes_c;;Spirochaetales;;Spirochaetaceae;;FJ748821_g;EU488391_s                                 | EU488391_s        | 0.0337 | 0     |
| Bacteria;;Spirochaetes;;Spirochaetes_c;;Spirochaetales;;Spirochaetaceae;;FJ748821_g;FJ748821_g_uc                              | FJ748821_g_uc     | 0.0673 | 0     |
| Bacteria;;Spirochaetes;;Spirochaetes_c;;Spirochaetales;;Spirochaetaceae;;FJ748821_g;FJ813563_s                                 | FJ813563_s        | 0.0673 | 0     |
| Bacteria;;Spirochaetes;;Spirochaetes_c;;Spirochaetales;;Spirochaetaceae;;Spirochaetaceae_uc;Spirochaetaceae_uc_s               | Spirochaetaceae_u | 0.0337 | 0     |
| Bacteria;;Tenericutes;;Mollicutes;;AM275436_o;;GQ866089_f;;GQ866089_f_uc;GQ866089_f_uc_s                                       | GQ866089_f_uc     | 0      | 0.097 |
| Bacteria;;Tenericutes;;Mollicutes;;GU196243_o;;GU196243_f;;GU196243_f_uc;GU196243_f_uc_s                                       | GU196243_f_uc     | 0.0168 | 0.073 |
| Bacteria;;Tenericutes;;Mollicutes;;GU196243_o;;GU196243_o_uc;;GU196243_o_uc_g;GU196243_o_uc_s                                  | GU196243_o_uc     | 0      | 0.024 |
| Bacteria;;Tenericutes;;Mollicutes;;GU196243_o;;HM127590_f;;HM127590_f_uc;HM127590_f_uc_s                                       | HM127590_f_uc     | 0      | 0.048 |
| Bacteria;;Tenericutes;;Tenericutes_uc;;Tenericutes_uc_o;;Tenericutes_uc_f;;Tenericutes_uc_g;Tenericutes_uc_s                   | Tenericutes_uc_s  | 0      | 0.024 |
| Bacteria;;TM6;;TM6_c;;FJ264771_o;;FJ264771_f;;FJ264771_f_uc;FJ264771_f_uc_s                                                    | FJ264771_f_uc_s   | 0.0841 | 0.024 |
| Bacteria;;TM6;;TM6_c;;FJ264771_o;;FJ264771_f;;FJ264771_g;FJ264771_g_uc                                                         | FJ264771_g_uc     | 0.0673 | 0     |
| Bacteria;;TM6;;TM6_c;;TM6_o;;AM997772_f;;AM997772_g;AM997772_g_uc                                                              | AM997772_g_uc     | 0      | 0.024 |
| Bacteria;;TM6;;TM6_c;;TM6_o;;AY661981_f;;AY661981_g;AY661981_g_uc                                                              | AY661981_g_uc     | 0.0168 | 0.024 |
| Bacteria;;TM6;;TM6_c;;TM6_o;;DQ129127_f;;DQ129127_f_uc;DQ129127_f_uc_s                                                         | DQ129127_f_uc     | 0      | 0.048 |
| Bacteria;;TM6;;TM6_c;;TM6_o;;EU038003_f;;AB257652_g;4P004701_s                                                                 | 4P004701_s        | 0.0168 | 0     |
| Bacteria;;TM6;;TM6_c;;TM6_o;;EU038003_f;;AB257652_g;4P004710_s                                                                 | 4P004710_s        | 0      | 0.024 |
| Bacteria;;TM6;;TM6_c;;TM6_o;;EU038003_f;;AB257652_g;AB257652_g_uc                                                              | AB257652_g_uc     | 0.0168 | 0     |
| Bacteria;;TM6;;TM6_c;;TM6_o;;EU236331_f;;EU236331_f_uc;EU236331_f_uc_s                                                         | EU236331_f_uc_s   | 0      | 0.048 |
| Bacteria;;TM6;;TM6_c;;TM6_o;;EU266778_f;;EU266778_f_uc;EU266778_f_uc_s                                                         | EU266778_f_uc_s   | 0      | 0.048 |
| Bacteria;;TM6;;TM6_c;;TM6_o;;EU373911_f;;EU373911_f_uc;EU373911_f_uc_s                                                         | EU373911_f_uc_s   | 0      | 0.024 |
| Bacteria;;TM6;;TM6_c;;TM6_o;;EU491195_f;;EU491195_g;EU491195_s                                                                 | EU491195_s        | 0      | 0.024 |
| Bacteria;;TM6;;TM6_c;;TM6_o;;EU735020_f;;EU735020_f_uc;EU735020_f_uc_s                                                         | EU735020_f_uc_s   | 0.0168 | 0.024 |
| Bacteria;;TM6;;TM6_c;;TM6_o;;GU172187_f;;GU172187_f_uc;GU172187_f_uc_s                                                         | GU172187_f_uc     | 0.0168 | 0.097 |
| Bacteria;;TM6;;TM6_c;;TM6_o;;HM480205_f;;HM480205_f_uc;HM480205_f_uc_s                                                         | HM480205_f_uc     | 0      | 0.048 |
| Bacteria;;TM6;;TM6_c;;TM6_o;;HQ190379_f;;HQ190379_f_uc;HQ190379_f_uc_s                                                         | HQ190379_f_uc     | 0      | 0.024 |
| Bacteria;;TM6;;TM6_c;;TM6_o;;JF344150_f;;JF344150_f_uc;JF344150_f_uc_s                                                         | JF344150_f_uc_s   | 0      | 0.097 |
| Bacteria;;TM6;;TM6_c;;TM6_o;;JF344625_f;;JF344625_g;JF344625_g_uc                                                              | JF344625_g_uc     | 0.0337 | 0     |
| Bacteria;;TM6;;TM6_c;;TM6_o;;JF830145_f;;JF830145_f_uc;JF830145_f_uc_s                                                         | JF830145_f_uc_s   | 0.0168 | 0     |
| Bacteria;;TM7;;TM7_c;;JF421159_o;;EU328026_f;;4P002782_g;4P002782_g_uc                                                         | 4P002782_g_uc     | 0.0168 | 0     |
| Bacteria;;TM7;;TM7_c;;JF421159_o;;JF421159_f;;JF421159_f_uc;JF421159_f_uc_s                                                    | JF421159_f_uc_s   | 0      | 0.145 |
| Bacteria;;UT06;;AM712334_c;;DQ811951_o;;DQ811951_f;;DQ811951_f_uc;DQ811951_f_uc_s                                              | DQ811951_f_uc     | 0.0337 | 0     |
| Bacteria;;UT06;;UT06_c;;UT06_o;;AF323761_f;;AF323761_f_uc;AF323761_f_uc_s                                                      | AF323761_f_uc_s   | 0.2187 | 0.024 |
| Bacteria;;UT06;;UT06_c;;UT06_o;;AF323761_f;;EU385684_g;EU385684_s                                                              | EU385684_s        | 0.0505 | 0     |
| Bacteria;;Verrucomicrobia;;Opitutae;;Puniceococcales;;AY695840_f;;AY695840_f_uc;AY695840_f_uc_s                                | AY695840_f_uc     | 0      | 0.024 |

|                                                                                                               |                   |        |       |
|---------------------------------------------------------------------------------------------------------------|-------------------|--------|-------|
| Bacteria;;;Verrucomicrobiae;;Opitutae;;Puniceococcales;;Pelagococcus_f;;Pelagococcus_f_uc;Pelagicoccus_f_uc_s | Pelagococcus_f_uc | 0      | 0.024 |
| Bacteria;;;Verrucomicrobiae;;Verrucomicrobiae;;Verrucomicrobiales;;Rubritalea_f;;GQ262724_g;GQ262724_g_uc     | GQ262724_g_uc     | 0      | 0.024 |
| Bacteria;;;WM88;;WM88_c;;WM88_o;;WM88_f;;WM88_g;FJ712470_s                                                    | FJ712470_s        | 0      | 0.024 |
| Bacteria;;;WS1;;WS1_c;;WS1_o;;WS1_o_uc;;WS1_o_uc_g;WS1_o_uc_s                                                 | WS1_o_uc_s        | 0      | 0.024 |
| Bacteria;;;WS3;;AQSL_c;;AQSL_o;;AQSL_f;;AQSL_g;AQSL_g_uc                                                      | AQSL_g_uc         | 0.0168 | 0     |
| Bacteria;;;WS3;;AQSL_c;;AQSL_o;;EU592431_f;;EU592431_f_uc;EU592431_f_uc_s                                     | EU592431_f_uc_s   | 0.0841 | 0     |
| Bacteria;;;WS3;;GU302492_c;;AB252949_o;;EU734965_f;;EU734965_f_uc;EU734965_f_uc_s                             | EU734965_f_uc_s   | 0      | 0.073 |
| Bacteria;;;WS3;;GU302492_c;;AB252949_o;;EU734965_f;;EU734965_g;KC010014_s                                     | KC010014_s        | 0      | 0.024 |
| Bacteria;;;WS3;;GU302492_c;;AB530233_o;;AB530233_f;;AB530233_f_uc;AB530233_f_uc_s                             | AB530233_f_uc_s   | 0.1178 | 0     |
| Bacteria;;;WS3;;GU302492_c;;AB530233_o;;AB530233_f;;AB530233_g;AB530233_g_uc                                  | AB530233_g_uc     | 0      | 0.073 |
| Bacteria;;;WS3;;GU302492_c;;AB530233_o;;AB530233_f;;AB530233_g;HM598262_s                                     | HM598262_s        | 0.0168 | 0     |
| Bacteria;;;WS3;;GU302492_c;;AB530233_o;;AB530233_f;;AB530233_g;JX391644_s                                     | JX391644_s        | 0.0505 | 0.024 |
| Bacteria;;;WS3;;GU302492_c;;AB530233_o;;AB530233_o_uc;;AB530233_o_uc_g;AB530233_o_uc_s                        | AB530233_o_uc_s   | 0.0673 | 0     |
| Bacteria;;;WS3;;GU302492_c;;AB530233_o;;EU491142_f;;EU491142_g;EU491142_g_uc                                  | EU491142_g_uc     | 0.0337 | 0     |
| Bacteria;;;WS3;;GU302492_c;;AB530233_o;;GU302492_f;;GU302492_f_uc;GU302492_f_uc_s                             | GU302492_f_uc_s   | 0.0337 | 0.024 |
| Bacteria;;;WS3;;GU302492_c;;AB530233_o;;GU302492_f;;GU302492_g;GU302492_g_uc                                  | GU302492_g_uc     | 0      | 0.024 |
| Bacteria;;;WS3;;GU302492_c;;AM991194_o;;AM991194_f;;AM991194_f_uc;AM991194_f_uc_s                             | AM991194_f_uc_s   | 0.0168 | 0.073 |
| Bacteria;;;WS3;;GU302492_c;;AM991194_o;;AM991194_f;;AM991194_g;EF032778_s                                     | EF032778_s        | 0      | 0.024 |
| Bacteria;;;WS3;;GU302492_c;;AM991194_o;;AM991194_f;;DQ431883_g;DQ431883_g_uc                                  | DQ431883_g_uc     | 0.0168 | 0     |
| Bacteria;;;WS3;;GU302492_c;;AM991194_o;;AM991194_o_uc;;AM991194_o_uc_g;AM991194_o_uc_s                        | AM991194_o_uc_s   | 0      | 0.024 |
| Bacteria;;;WS3;;GU302492_c;;AM991194_o;;EU135571_f;;EU135571_f_uc;EU135571_f_uc_s                             | EU135571_f_uc_s   | 0.0673 | 0     |
| Bacteria;;;WS3;;GU302492_c;;AM991194_o;;EU881351_f;;EU881351_f_uc;EU881351_f_uc_s                             | EU881351_f_uc_s   | 0.0168 | 0.073 |
| Bacteria;;;WS3;;GU302492_c;;AM991194_o;;EU881351_f;;EU881351_g;AY592156_s                                     | AY592156_s        | 0.0168 | 0     |
| Bacteria;;;WS3;;GU302492_c;;DQ811952_o;;DQ811952_f;;DQ811952_f_uc;DQ811952_f_uc_s                             | DQ811952_f_uc_s   | 0.0505 | 0     |
| Bacteria;;;WS3;;GU302492_c;;EU488324_o;;EU488324_f;;EU488324_g;EU488324_s                                     | EU488324_s        | 0      | 0.024 |
| Bacteria;;;WS3;;GU302492_c;;EU652628_o;;EU652628_f;;EU652628_f_uc;EU652628_f_uc_s                             | EU652628_f_uc_s   | 0      | 0.024 |
| Bacteria;;;WS3;;GU302492_c;;GQ246422_o;;GQ246422_f;;GQ246422_f_uc;GQ246422_f_uc_s                             | GQ246422_f_uc_s   | 0.0168 | 0     |
| Bacteria;;;WS3;;GU302492_c;;GQ246422_o;;GQ246422_f;;GQ246422_g;FJ358926_s                                     | FJ358926_s        | 0.0337 | 0     |
| Bacteria;;;WS3;;GU302492_c;;GQ246422_o;;GQ246422_f;;GQ246422_g;FJ712435_s                                     | FJ712435_s        | 0.0337 | 0     |
| Bacteria;;;WS3;;GU302492_c;;HM243942_o;;FJ484527_f;;FJ484527_f_uc;FJ484527_f_uc_s                             | FJ484527_f_uc_s   | 0.0505 | 0     |
