# Supplementary material for: High-throughput screening of sediment bacterial communities from Oxygen Minimum Zones of the northern Indian Ocean
Source: Copernicus journal article supplement (doi:10.5194/bg-2019-330), 2019-08-29
Supplement: Supplementary file [file bg-2019-330-AC2-supplement.pdf]

| OTU     | GS1A       | %           | PS1B       | %           | Taxonomy_Silva_132                                                                                                 |
|---------|------------|-------------|------------|-------------|--------------------------------------------------------------------------------------------------------------------|
| otu0001 | 0          | 0           | 2          | 0.05        | Bacteria;Acidobacteria;Acidobacteria_un;Acidobacteria_un;Acidobacteria_un;Acidobacteria_un;                        |
| otu0002 | 0          | 0           | 1          | 0.02        | Bacteria;Acidobacteria;Acidobacteriia;Solibacterales;Solibacteraceae_(Subgroup_3);PAUC26f;                         |
| otu0003 | 49         | 0.82        | 5          | 0.12        | Bacteria;Acidobacteria;Aminicenantia;Aminicenantales;Aminicenantales_fa;Aminicenantales_ge;                        |
| otu0004 | 1          | 0.02        | 7          | 0.17        | Bacteria;Acidobacteria;AT-s3-28;AT-s3-28_or;AT-s3-28_fa;AT-s3-28_ge;                                               |
| otu0005 | 1          | 0.02        | 0          | 0           | Bacteria;Acidobacteria;Blastocatellia_(Subgroup_4);Blastocatellales;Blastocatellaceae;Blastocatella;               |
| otu0006 | 0          | 0           | 2          | 0.05        | Bacteria;Acidobacteria;Holophagae;Subgroup_7;Subgroup_7_fa;Subgroup_7_ge;                                          |
| otu0007 | 1          | 0.02        | 0          | 0           | Bacteria;Acidobacteria;ODP1230B23.02;ODP1230B23.02_or;ODP1230B23.02_fa;ODP1230B23.02_ge;                           |
| otu0008 | 1          | 0.02        | 15         | 0.36        | Bacteria;Acidobacteria;Subgroup_17;Subgroup_17_or;Subgroup_17_fa;Subgroup_17_ge;                                   |
| otu0009 | 9          | 0.15        | 41         | 0.99        | Bacteria;Acidobacteria;Subgroup_21;Subgroup_21_or;Subgroup_21_fa;Subgroup_21_ge;                                   |
| otu0010 | 5          | 0.08        | 50         | 1.21        | Bacteria;Acidobacteria;Subgroup_22;Subgroup_22_or;Subgroup_22_fa;Subgroup_22_ge;                                   |
| otu0011 | 2          | 0.03        | 11         | 0.27        | Bacteria;Acidobacteria;Subgroup_26;Subgroup_26_or;Subgroup_26_fa;Subgroup_26_ge;                                   |
| otu0012 | 0          | 0           | 1          | 0.02        | Bacteria;Acidobacteria;Subgroup_5;Subgroup_5_or;Subgroup_5_fa;Subgroup_5_ge;                                       |
| otu0013 | 1          | 0.02        | 13         | 0.32        | Bacteria;Acidobacteria;Subgroup_6;Subgroup_6_or;Subgroup_6_fa;Subgroup_6_ge;                                       |
| otu0014 | 0          | 0           | 1          | 0.02        | Bacteria;Acidobacteria;Subgroup_6;Subgroup_6_un;Subgroup_6_un;Subgroup_6_un;                                       |
| otu0015 | 8          | 0.13        | 30         | 0.73        | Bacteria;Acidobacteria;Subgroup_9;Subgroup_9_or;Subgroup_9_fa;Subgroup_9_ge;                                       |
| otu0016 | 8          | 0.13        | 0          | 0           | Bacteria;Acidobacteria;Thermoanaerobaculia;Thermoanaerobaculales;Thermoanaerobaculaceae;B276-D12;                  |
| otu0017 | 9          | 0.15        | 81         | 1.96        | Bacteria;Acidobacteria;Thermoanaerobaculia;Thermoanaerobaculales;Thermoanaerobaculaceae;Subgroup_10;               |
| otu0018 | 14         | 0.24        | 17         | 0.41        | Bacteria;Acidobacteria;Thermoanaerobaculia;Thermoanaerobaculales;Thermoanaerobaculaceae;Subgroup_23;               |
| otu0019 | 0          | 0           | 1          | 0.02        | Bacteria;Acidobacteria;Thermoanaerobaculia;Thermoanaerobaculales;Thermoanaerobaculaceae;Thermoanaerobaculaceae_un; |
|         | <b>109</b> | <b>1.83</b> | <b>278</b> | <b>6.74</b> |                                                                                                                    |
| otu0020 | 4          | 0.07        | 8          | 0.19        | Bacteria;Actinobacteria;Acidimicrobiia;Acidimicrobiia_un;Acidimicrobiia_un;Acidimicrobiia_un;                      |
| otu0021 | 2          | 0.03        | 2          | 0.05        | Bacteria;Actinobacteria;Acidimicrobiia;Actinomarinales;Actinomarinales_un;Actinomarinales_un;                      |
| otu0022 | 104        | 1.75        | 78         | 1.89        | Bacteria;Actinobacteria;Acidimicrobiia;Actinomarinales;uncultured;uncultured_ge;                                   |
| otu0023 | 5          | 0.08        | 14         | 0.34        | Bacteria;Actinobacteria;Acidimicrobiia;IMCC26256;IMCC26256_fa;IMCC26256_ge;                                        |
| otu0024 | 0          | 0           | 3          | 0.07        | Bacteria;Actinobacteria;Acidimicrobiia;Microtrichales;Ilumatobacteraceae;Ilumatobacter;                            |
| otu0025 | 0          | 0           | 14         | 0.34        | Bacteria;Actinobacteria;Acidimicrobiia;Microtrichales;Microtrichaceae;IMCC26207;                                   |
| otu0026 | 0          | 0           | 2          | 0.05        | Bacteria;Actinobacteria;Acidimicrobiia;Microtrichales;Microtrichaceae;Microtrichaceae_un;                          |
| otu0027 | 0          | 0           | 42         | 1.02        | Bacteria;Actinobacteria;Acidimicrobiia;Microtrichales;Microtrichaceae;Sva0996_marine_group;                        |
| otu0028 | 0          | 0           | 1          | 0.02        | Bacteria;Actinobacteria;Acidimicrobiia;Microtrichales;Microtrichaceae;uncultured;                                  |
| otu0029 | 0          | 0           | 10         | 0.24        | Bacteria;Actinobacteria;Acidimicrobiia;Microtrichales;Microtrichales_un;Microtrichales_un;                         |
| otu0030 | 0          | 0           | 3          | 0.07        | Bacteria;Actinobacteria;Acidimicrobiia;Microtrichales;uncultured;uncultured_ge;                                    |
| otu0031 | 0          | 0           | 34         | 0.82        | Bacteria;Actinobacteria;Actinobacteria;Actinobacteria_un;Actinobacteria_un;Actinobacteria_un;                      |
| otu0032 | 0          | 0           | 2          | 0.05        | Bacteria;Actinobacteria;Actinobacteria;Corynebacteriales;Mycobacteriaceae;Mycobacterium;                           |
| otu0033 | 0          | 0           | 1          | 0.02        | Bacteria;Actinobacteria;Actinobacteria;Corynebacteriales;Nocardiaceae;Millsia;                                     |
| otu0034 | 0          | 0           | 2          | 0.05        | Bacteria;Actinobacteria;Actinobacteria;Corynebacteriales;Nocardiaceae;Nocardia;                                    |
| otu0035 | 0          | 0           | 1          | 0.02        | Bacteria;Actinobacteria;Actinobacteria;Frankiales;Frankiales_un;Frankiales_un;                                     |
| otu0036 | 0          | 0           | 2          | 0.05        | Bacteria;Actinobacteria;Actinobacteria;Frankiales;Geodermatophilaceae;Geodermatophilus;                            |
| otu0037 | 0          | 0           | 1          | 0.02        | Bacteria;Actinobacteria;Actinobacteria;Micrococcales;Micrococcaceae;Micrococcaceae_un;                             |
| otu0038 | 0          | 0           | 1          | 0.02        | Bacteria;Actinobacteria;Actinobacteria;Micromonosporales;Micromonosporaceae;Actinoplanes;                          |
| otu0039 | 0          | 0           | 1          | 0.02        | Bacteria;Actinobacteria;Actinobacteria;Micromonosporales;Micromonosporaceae;Micromonospora;                        |
| otu0040 | 0          | 0           | 2          | 0.05        | Bacteria;Actinobacteria;Actinobacteria;PeM15;PeM15_fa;PeM15_ge;                                                    |
| otu0041 | 1          | 0.02        | 0          | 0           | Bacteria;Actinobacteria;Actinobacteria;Propionibacteriales;Nocardioideae;Nocardioideae;                            |
| otu0042 | 0          | 0           | 1          | 0.02        | Bacteria;Actinobacteria;Actinobacteria;Propionibacteriales;Propionibacteriaceae;Cutibacterium;                     |
| otu0043 | 0          | 0           | 1          | 0.02        | Bacteria;Actinobacteria;Actinobacteria;Propionibacteriales;Propionibacteriaceae;Microclunatus;                     |
| otu0044 | 0          | 0           | 1          | 0.02        | Bacteria;Actinobacteria;Actinobacteria;Pseudonocardiales;Pseudonocardaceae;Actinomycetospora;                      |
| otu0045 | 0          | 0           | 5          | 0.12        | Bacteria;Actinobacteria;Actinobacteria;Streptomycetales;Streptomycetaceae;Streptomyces;                            |
| otu0046 | 0          | 0           | 1          | 0.02        | Bacteria;Actinobacteria;Actinobacteria;Streptomycetales;Streptomycetaceae;Streptomycetaceae_un;                    |
| otu0047 | 0          | 0           | 1          | 0.02        | Bacteria;Actinobacteria;Actinobacteria;Streptosporangiales;Streptosporangiaceae;Streptosporangiaceae_un;           |
| otu0048 | 1          | 0.02        | 0          | 0           | Bacteria;Actinobacteria;Actinobacteria;Streptosporangiales;Thermomonosporaceae;Actinoallomurus;                    |
| otu0049 | 1          | 0.02        | 8          | 0.19        | Bacteria;Actinobacteria;Actinobacteria_un;Actinobacteria_un;Actinobacteria_un;Actinobacteria_un;                   |
| otu0050 | 1          | 0.02        | 5          | 0.12        | Bacteria;Actinobacteria;Coriobacteriia;CG2-30-50-142;CG2-30-50-142_fa;CG2-30-50-142_ge;                            |
| otu0051 | 2          | 0.03        | 0          | 0           | Bacteria;Actinobacteria;Coriobacteriia;FS118-23B-02;FS118-23B-02_fa;FS118-23B-02_ge;                               |
| otu0052 | 0          | 0           | 2          | 0.05        | Bacteria;Actinobacteria;Coriobacteriia;OPB41;OPB41_fa;OPB41_ge;                                                    |
| otu0053 | 0          | 0           | 1          | 0.02        | Bacteria;Actinobacteria;MB-A2-108;MB-A2-108_or;MB-A2-108_fa;MB-A2-108_ge;                                          |
| otu0054 | 1          | 0.02        | 0          | 0           | Bacteria;Actinobacteria;RBG-16-55-12;RBG-16-55-12_or;RBG-16-55-12_fa;RBG-16-55-12_ge;                              |
| otu0055 | 0          | 0           | 1          | 0.02        | Bacteria;Actinobacteria;Rubrobacteria;Rubrobacteriales;Rubrobacteriaceae;Rubrobacter;                              |
| otu0056 | 0          | 0           | 1          | 0.02        | Bacteria;Actinobacteria;Thermoleophilia;Gaiellales;Gaiellales_fa;Gaiellales_ge;                                    |
| otu0057 | 3          | 0.05        | 4          | 0.1         | Bacteria;Actinobacteria;Thermoleophilia;Gaiellales;Gaiellales_un;Gaiellales_un;                                    |
| otu0058 | 1          | 0.02        | 24         | 0.58        | Bacteria;Actinobacteria;Thermoleophilia;Gaiellales;uncultured;uncultured_ge;                                       |
| otu0059 | 1          | 0.02        | 10         | 0.24        | Bacteria;Actinobacteria;Thermoleophilia;Solirubrobacteriales;67-14;67-14_ge;                                       |
| otu0060 | 1          | 0.02        | 1          | 0.02        | Bacteria;Actinobacteria;Thermoleophilia;Solirubrobacteriales;Solirubrobacteriaceae;Solirubrobacteriaceae_un;       |
| otu0061 | 1          | 0.02        | 0          | 0           | Bacteria;Actinobacteria;Thermoleophilia;Solirubrobacteriales;Solirubrobacteriales_un;Solirubrobacteriales_un;      |
| otu0062 | 0          | 0           | 6          | 0.15        | Bacteria;Actinobacteria;Thermoleophilia;Thermoleophilia_un;Thermoleophilia_un;Thermoleophilia_un;                  |
| otu0063 | 0          | 0           | 2          | 0.05        | Bacteria;Actinobacteria;WCHB1-81;WCHB1-81_or;WCHB1-81_fa;WCHB1-81_ge;                                              |
|         | <b>129</b> | <b>2.17</b> | <b>299</b> | <b>7.25</b> |                                                                                                                    |
| otu0064 | 0          | 0           | 1          | 0.02        | Bacteria;Aegiribacteria;Aegiribacteria_cl;Aegiribacteria_or;Aegiribacteria_fa;Aegiribacteria_ge;                   |
|         | <b>0</b>   | <b>0</b>    | <b>1</b>   | <b>0.02</b> |                                                                                                                    |
| otu0065 | 0          | 0           | 1          | 0.02        | Bacteria;AncK6;AncK6_cl;AncK6_or;AncK6_fa;AncK6_ge;                                                                |
|         | <b>0</b>   | <b>0</b>    | <b>1</b>   | <b>0.02</b> |                                                                                                                    |
| otu0066 | 1          | 0.02        | 1          | 0.02        | Bacteria;Armatimonadetes;DG-56;DG-56_or;DG-56_fa;DG-56_ge;                                                         |
| otu0067 | 0          | 0           | 2          | 0.05        | Bacteria;Armatimonadetes;Fimbriimonadia;Fimbriimonadales;Fimbriimonadaceae;Fimbriimonadaceae_ge;                   |

|         |             |             |            |             |                                                                                                     |
|---------|-------------|-------------|------------|-------------|-----------------------------------------------------------------------------------------------------|
| otu0068 | 0           | 0           | 1          | 0.02        | Bacteria;Armatimonadetes;Fimbriimonadia;Fimbriimonadales;Fimbriimonadaceae;Fimbriimonadaceae_un;    |
|         | <b>1</b>    | <b>0.02</b> | <b>4</b>   | <b>0.1</b>  |                                                                                                     |
| otu0069 | 3           | 0.05        | 0          | 0           | Bacteria; <b>Atribacteria</b> ;JS1;JS1_or;JS1_fa;JS1_ge;                                            |
|         | <b>3</b>    | <b>0.05</b> | <b>0</b>   | <b>0</b>    |                                                                                                     |
| otu0070 | 105         | 1.77        | 112        | 2.72        | Bacteria; <b>Bacteria_un</b> ;Bacteria_un;Bacteria_un;Bacteria_un;Bacteria_un;                      |
|         | <b>105</b>  | <b>1.77</b> | <b>112</b> | <b>2.72</b> |                                                                                                     |
| otu0071 | 1           | 0.02        | 0          | 0           | Bacteria; <b>Bacteroidetes</b> ;Bacteroidia;Bacteroidales;Bacteroidales_un;Bacteroidales_un;        |
| otu0072 | 0           | 0           | 4          | 0.1         | Bacteria;Bacteroidetes;Bacteroidia;Bacteroidales;Bacteroidetes_BD2-2;Bacteroidetes_BD2-2_ge;        |
| otu0073 | 0           | 0           | 6          | 0.15        | Bacteria;Bacteroidetes;Bacteroidia;Bacteroidales;Marinifilaceae;Marinifilum;                        |
| otu0074 | 0           | 0           | 1          | 0.02        | Bacteria;Bacteroidetes;Bacteroidia;Bacteroidales;Marinilabiliaceae;Labilibacter;                    |
| otu0075 | 1           | 0.02        | 0          | 0           | Bacteria;Bacteroidetes;Bacteroidia;Bacteroidales;Marinilabiliaceae;uncultured;                      |
| otu0076 | 0           | 0           | 1          | 0.02        | Bacteria;Bacteroidetes;Bacteroidia;Bacteroidales;Prolixibacteraceae;Prolixibacter;                  |
| otu0077 | 0           | 0           | 4          | 0.1         | Bacteria;Bacteroidetes;Bacteroidia;Bacteroidia_un;Bacteroidia_un;Bacteroidia_un;                    |
| otu0078 | 0           | 0           | 6          | 0.15        | Bacteria;Bacteroidetes;Bacteroidia;Chitinophagales;Saprospiraceae;Saprospiraceae_un;                |
| otu0079 | 0           | 0           | 13         | 0.32        | Bacteria;Bacteroidetes;Bacteroidia;Chitinophagales;Saprospiraceae;uncultured;                       |
| otu0080 | 1           | 0.02        | 10         | 0.24        | Bacteria;Bacteroidetes;Bacteroidia;Cytophagales;Cyclobacteriaceae;uncultured;                       |
| otu0081 | 0           | 0           | 2          | 0.05        | Bacteria;Bacteroidetes;Bacteroidia;Flavobacteriales;Crocinitomicaceae;Crocinitomicaceae_un;         |
| otu0082 | 1           | 0.02        | 0          | 0           | Bacteria;Bacteroidetes;Bacteroidia;Flavobacteriales;Crocinitomicaceae;Crocinitomix;                 |
| otu0083 | 0           | 0           | 3          | 0.07        | Bacteria;Bacteroidetes;Bacteroidia;Flavobacteriales;Crocinitomicaceae;Salinirepens;                 |
| otu0084 | 0           | 0           | 3          | 0.07        | Bacteria;Bacteroidetes;Bacteroidia;Flavobacteriales;Flavobacteriaceae;Actibacter;                   |
| otu0085 | 1           | 0.02        | 2          | 0.05        | Bacteria;Bacteroidetes;Bacteroidia;Flavobacteriales;Flavobacteriaceae;Aquibacter;                   |
| otu0086 | 0           | 0           | 1          | 0.02        | Bacteria;Bacteroidetes;Bacteroidia;Flavobacteriales;Flavobacteriaceae;Flavobacteriaceae_ge;         |
| otu0087 | 3           | 0.05        | 8          | 0.19        | Bacteria;Bacteroidetes;Bacteroidia;Flavobacteriales;Flavobacteriaceae;Flavobacteriaceae_un;         |
| otu0088 | 2           | 0.03        | 3          | 0.07        | Bacteria;Bacteroidetes;Bacteroidia;Flavobacteriales;Flavobacteriaceae;Lutibacter;                   |
| otu0089 | 0           | 0           | 3          | 0.07        | Bacteria;Bacteroidetes;Bacteroidia;Flavobacteriales;Flavobacteriaceae;Lutimonas;                    |
| otu0090 | 0           | 0           | 5          | 0.12        | Bacteria;Bacteroidetes;Bacteroidia;Flavobacteriales;Flavobacteriaceae;Robiginitalea;                |
| otu0091 | 1011        | 17          | 0          | 0           | Bacteria;Bacteroidetes;Bacteroidia;Flavobacteriales;Flavobacteriaceae;Salegentibacter;              |
| otu0092 | 1           | 0.02        | 0          | 0           | Bacteria;Bacteroidetes;Bacteroidia;Flavobacteriales;Flavobacteriaceae;Ulvibacter;                   |
| otu0093 | 0           | 0           | 9          | 0.22        | Bacteria;Bacteroidetes;Bacteroidia;Flavobacteriales;Flavobacteriaceae;Zeaxanthinibacter;            |
| otu0094 | 0           | 0           | 1          | 0.02        | Bacteria;Bacteroidetes;Bacteroidia;Flavobacteriales;Flavobacteriales_un;Flavobacteriales_un;        |
| otu0095 | 0           | 0           | 1          | 0.02        | Bacteria;Bacteroidetes;Bacteroidia;Sphingobacteriales;AKYH767;AKYH767_ge;                           |
| otu0096 | 0           | 0           | 5          | 0.12        | Bacteria;Bacteroidetes;Bacteroidia;Sphingobacteriales;Lentimicrobiaceae;Lentimicrobiaceae_ge;       |
| otu0097 | 0           | 0           | 2          | 0.05        | Bacteria;Bacteroidetes;Bacteroidia;Sphingobacteriales;Sphingobacteriales_un;Sphingobacteriales_un;  |
| otu0098 | 0           | 0           | 1          | 0.02        | Bacteria;Bacteroidetes;Ignavibacteria;Ignavibacteria_un;Ignavibacteria_un;Ignavibacteria_un;        |
| otu0099 | 2           | 0.03        | 3          | 0.07        | Bacteria;Bacteroidetes;Ignavibacteria;Ignavibacteriales;Ignavibacteriales_un;Ignavibacteriales_un;  |
| otu0100 | 0           | 0           | 4          | 0.1         | Bacteria;Bacteroidetes;Ignavibacteria;Ignavibacteriales;Melioribacteraceae;lheB3-7;                 |
| otu0101 | 14          | 0.24        | 0          | 0           | Bacteria;Bacteroidetes;Ignavibacteria;Ignavibacteriales;PHOS-HE36;PHOS-HE36_ge;                     |
| otu0102 | 1           | 0.02        | 3          | 0.07        | Bacteria;Bacteroidetes;Ignavibacteria;Kryptoniales;BSV26;BSV26_ge;                                  |
| otu0103 | 0           | 0           | 1          | 0.02        | Bacteria;Bacteroidetes;Rhodothermia;Rhodothermales;Rhodothermaceae;Rhodothermaceae_un;              |
| otu0104 | 0           | 0           | 7          | 0.17        | Bacteria;Bacteroidetes;Rhodothermia;Rhodothermales;Rhodothermaceae;uncultured;                      |
|         | <b>1039</b> | <b>17.5</b> | <b>112</b> | <b>2.72</b> |                                                                                                     |
| otu0105 | 0           | 0           | 3          | 0.07        | Bacteria; <b>BRC1</b> ;BRC1_cl;BRC1_or;BRC1_fa;BRC1_ge;                                             |
|         | <b>0</b>    | <b>0</b>    | <b>3</b>   | <b>0.07</b> |                                                                                                     |
| otu0106 | 3           | 0.05        | 3          | 0.07        | Bacteria; <b>Calditrichaeota</b> ;Calditrichia;Calditrichales;Calditrichaceae;Calditrichaceae_ge;   |
| otu0107 | 1           | 0.02        | 0          | 0           | Bacteria;Calditrichaeota;Calditrichia;Calditrichales;Calditrichaceae;Calditrichaceae_un;            |
| otu0108 | 3           | 0.05        | 0          | 0           | Bacteria;Calditrichaeota;Calditrichia;Calditrichales;Calditrichaceae;Calorithrix;                   |
| otu0109 | 0           | 0           | 2          | 0.05        | Bacteria;Calditrichaeota;Calditrichia;Calditrichales;Calditrichaceae;JdFR-76;                       |
|         | <b>7</b>    | <b>0.12</b> | <b>5</b>   | <b>0.12</b> |                                                                                                     |
| otu0110 | 2           | 0.03        | 0          | 0           | Bacteria; <b>Chlamydiae</b> ;LD1-PA32;LD1-PA32_or;LD1-PA32_fa;LD1-PA32_ge;                          |
|         | <b>2</b>    | <b>0.03</b> | <b>0</b>   | <b>0</b>    |                                                                                                     |
| otu0111 | 0           | 0           | 1          | 0.02        | Bacteria; <b>Chloroflexi</b> ;Anaerolineae;1-20;1-20_fa;1-20_ge;                                    |
| otu0112 | 9           | 0.15        | 0          | 0           | Bacteria;Chloroflexi;Anaerolineae;ADurb.Bin180;ADurb.Bin180_fa;ADurb.Bin180_ge;                     |
| otu0113 | 9           | 0.15        | 3          | 0.07        | Bacteria;Chloroflexi;Anaerolineae;Anaerolineae_un;Anaerolineae_un;Anaerolineae_un;                  |
| otu0114 | 8           | 0.13        | 6          | 0.15        | Bacteria;Chloroflexi;Anaerolineae;Anaerolineales;Anaerolineaceae;Anaerolineaceae_un;                |
| otu0115 | 1           | 0.02        | 0          | 0           | Bacteria;Chloroflexi;Anaerolineae;Anaerolineales;Anaerolineaceae;Pelolinea;                         |
| otu0116 | 0           | 0           | 1          | 0.02        | Bacteria;Chloroflexi;Anaerolineae;Anaerolineales;Anaerolineaceae;RBG-16-58-14;                      |
| otu0117 | 151         | 2.54        | 49         | 1.19        | Bacteria;Chloroflexi;Anaerolineae;Anaerolineales;Anaerolineaceae;uncultured;                        |
| otu0118 | 9           | 0.15        | 27         | 0.65        | Bacteria;Chloroflexi;Anaerolineae;Ardenticatenales;uncultured;uncultured_ge;                        |
| otu0119 | 0           | 0           | 19         | 0.46        | Bacteria;Chloroflexi;Anaerolineae;Caldilineales;Caldilineaceae;uncultured;                          |
| otu0120 | 21          | 0.35        | 0          | 0           | Bacteria;Chloroflexi;Anaerolineae;MSB-5B2;MSB-5B2_fa;MSB-5B2_ge;                                    |
| otu0121 | 0           | 0           | 1          | 0.02        | Bacteria;Chloroflexi;Anaerolineae;SBR1031;A4b;A4b_ge;                                               |
| otu0122 | 6           | 0.1         | 18         | 0.44        | Bacteria;Chloroflexi;Anaerolineae;SBR1031;SBR1031_fa;SBR1031_ge;                                    |
| otu0123 | 1           | 0.02        | 0          | 0           | Bacteria;Chloroflexi;Anaerolineae;Thermoflexales;Thermoflexaceae;Thermoflexus;                      |
| otu0124 | 18          | 0.3         | 5          | 0.12        | Bacteria;Chloroflexi;Anaerolineae;uncultured;uncultured_fa;uncultured_ge;                           |
| otu0125 | 0           | 0           | 1          | 0.02        | Bacteria;Chloroflexi;Chloroflexi_un;Chloroflexi_un;Chloroflexi_un;Chloroflexi_un;                   |
| otu0126 | 0           | 0           | 2          | 0.05        | Bacteria;Chloroflexi;Chloroflexia;Thermomicrobiales;JG30-KF-CM45;JG30-KF-CM45_ge;                   |
| otu0127 | 1           | 0.02        | 0          | 0           | Bacteria;Chloroflexi;Dehalococcoidia;Dehalococcoidales;Dehalococcoidales_Incertae_Sedis;Dehalobium; |
| otu0128 | 32          | 0.54        | 0          | 0           | Bacteria;Chloroflexi;Dehalococcoidia;Dehalococcoidia_un;Dehalococcoidia_un;Dehalococcoidia_un;      |
| otu0129 | 3           | 0.05        | 0          | 0           | Bacteria;Chloroflexi;Dehalococcoidia;DscP2;DscP2_fa;DscP2_ge;                                       |
| otu0130 | 3           | 0.05        | 1          | 0.02        | Bacteria;Chloroflexi;Dehalococcoidia;FS117-23B-02;FS117-23B-02_fa;FS117-23B-02_ge;                  |
| otu0131 | 2           | 0.03        | 0          | 0           | Bacteria;Chloroflexi;Dehalococcoidia;FW22;FW22_fa;FW22_ge;                                          |
| otu0132 | 1           | 0.02        | 0          | 0           | Bacteria;Chloroflexi;Dehalococcoidia;GIF3;GIF3_fa;GIF3_ge;                                          |

|         |            |             |            |             |                                                                                                                    |
|---------|------------|-------------|------------|-------------|--------------------------------------------------------------------------------------------------------------------|
| otu0133 | 9          | 0.15        | 0          | 0           | Bacteria;Chloroflexi;Dehalococcoidia;GIF9;AB-539-J10;SCGC-AB-539-J10;                                              |
| otu0134 | 3          | 0.05        | 0          | 0           | Bacteria;Chloroflexi;Dehalococcoidia;H3_93;H3_93_fa;H3_93_ge;                                                      |
| otu0135 | 12         | 0.2         | 2          | 0.05        | Bacteria;Chloroflexi;Dehalococcoidia;MSBL5;MSBL5_fa;MSBL5_ge;                                                      |
| otu0136 | 4          | 0.07        | 0          | 0           | Bacteria;Chloroflexi;Dehalococcoidia;Napoli-4B-65;Napoli-4B-65_fa;Napoli-4B-65_ge;                                 |
| otu0137 | 6          | 0.1         | 2          | 0.05        | Bacteria;Chloroflexi;Dehalococcoidia;S085;S085_fa;S085_ge;                                                         |
| otu0138 | 4          | 0.07        | 0          | 0           | Bacteria;Chloroflexi;Dehalococcoidia;Sh765B-AG-111;Sh765B-AG-111_fa;Sh765B-AG-111_ge;                              |
| otu0139 | 9          | 0.15        | 0          | 0           | Bacteria;Chloroflexi;Dehalococcoidia;vadinBA26;vadinBA26_fa;vadinBA26_ge;                                          |
| otu0140 | 5          | 0.08        | 1          | 0.02        | Bacteria;Chloroflexi;JG30-KF-CM66;JG30-KF-CM66_or;JG30-KF-CM66_fa;JG30-KF-CM66_ge;                                 |
| otu0141 | 1          | 0.02        | 42         | 1.02        | Bacteria;Chloroflexi;KD4-96;KD4-96_or;KD4-96_fa;KD4-96_ge;                                                         |
| otu0142 | 0          | 0           | 2          | 0.05        | Bacteria;Chloroflexi;Ktedonobacteria;MVP-21;MVP-21_fa;MVP-21_ge;                                                   |
| otu0143 | 0          | 0           | 2          | 0.05        | Bacteria;Chloroflexi;TK17;TK17_or;TK17_fa;TK17_ge;                                                                 |
|         | <b>328</b> | <b>5.52</b> | <b>185</b> | <b>4.48</b> |                                                                                                                    |
| otu0144 | 5          | 0.08        | 0          | 0           | Bacteria; <b>CK-2C2-2</b> ;CK-2C2-2_cl;CK-2C2-2_or;CK-2C2-2_fa;CK-2C2-2_ge;                                        |
|         | <b>5</b>   | <b>0.08</b> | <b>0</b>   | <b>0</b>    |                                                                                                                    |
| otu0145 | 0          | 0           | 8          | 0.19        | Bacteria; <b>Cyanobacteria</b> ;Melainabacteria;Gastranaerophilales;Gastranaerophilales_fa;Gastranaerophilales_ge; |
| otu0146 | 0          | 0           | 7          | 0.17        | Bacteria;Cyanobacteria;Oxyphotobacteria;Synechococcales;Cyanobiaceae;Cyanobiaceae_un;                              |
| otu0147 | 1          | 0.02        | 38         | 0.92        | Bacteria;Cyanobacteria;Oxyphotobacteria;Synechococcales;Cyanobiaceae;Cyanobium_PCC-6307;                           |
| otu0148 | 0          | 0           | 15         | 0.36        | Bacteria;Cyanobacteria;Oxyphotobacteria;Synechococcales;Cyanobiaceae;Synechococcus_CC9902;                         |
|         | <b>1</b>   | <b>0.02</b> | <b>68</b>  | <b>1.65</b> |                                                                                                                    |
| otu0149 | 5          | 0.08        | 21         | 0.51        | Bacteria; <b>Dadabacteria</b> ;Dadabacteriia;Dadabacteriales;Dadabacteriales_fa;Dadabacteriales_ge;                |
|         | <b>5</b>   | <b>0.08</b> | <b>21</b>  | <b>0.51</b> |                                                                                                                    |
| otu0150 | 1          | 0.02        | 2          | 0.05        | Bacteria; <b>Deinococcus-Thermus</b> ;Deinococci;Deinococcales;Trueperaceae;Truepera;                              |
|         | <b>1</b>   | <b>0.02</b> | <b>2</b>   | <b>0.05</b> |                                                                                                                    |
| otu0151 | 2          | 0.03        | 1          | 0.02        | Bacteria; <b>Dependentiae</b> ;Babeliae;Babeliales;Babeliaceae;Babeliaceae_ge;                                     |
| otu0152 | 4          | 0.07        | 2          | 0.05        | Bacteria;Dependentiae;Babeliae;Babeliales;Babeliales_fa;Babeliales_ge;                                             |
| otu0153 | 7          | 0.12        | 11         | 0.27        | Bacteria;Dependentiae;Babeliae;Babeliales;Babeliales_un;Babeliales_un;                                             |
| otu0154 | 0          | 0           | 1          | 0.02        | Bacteria;Dependentiae;Babeliae;Babeliales;UBA12409;UBA12409_ge;                                                    |
| otu0155 | 0          | 0           | 1          | 0.02        | Bacteria;Dependentiae;Babeliae;Babeliales;UBA12411;UBA12411_ge;                                                    |
| otu0156 | 4          | 0.07        | 6          | 0.15        | Bacteria;Dependentiae;Babeliae;Babeliales;Vermiphilaceae;Vermiphilaceae_ge;                                        |
|         | <b>17</b>  | <b>0.29</b> | <b>22</b>  | <b>0.53</b> |                                                                                                                    |
| otu0157 | 0          | 0           | 10         | 0.24        | Bacteria; <b>Epsilonbacteraota</b> ;Campylobacteria;Campylobacteriales;Sulfurovaceae;Sulfurovum;                   |
|         | <b>0</b>   | <b>0</b>    | <b>10</b>  | <b>0.24</b> |                                                                                                                    |
| otu0158 | 1          | 0.02        | 0          | 0           | Bacteria; <b>Fibrobacteres</b> ;Fibrobacteria;Fibrobacterales;TG3;TG3_ge;                                          |
|         | <b>1</b>   | <b>0.02</b> | <b>0</b>   | <b>0</b>    |                                                                                                                    |
| otu0159 | 0          | 0           | 1          | 0.02        | Bacteria; <b>Firmicutes</b> ;Bacilli;Bacillales;Alicyclobacillaceae;Effusibacillus;                                |
| otu0160 | 0          | 0           | 2          | 0.05        | Bacteria;Firmicutes;Bacilli;Bacillales;Alicyclobacillaceae;Tumebacillus;                                           |
| otu0161 | 83         | 1.4         | 0          | 0           | Bacteria;Firmicutes;Bacilli;Bacillales;Bacillaceae;Anaerobacillus;                                                 |
| otu0162 | 1          | 0.02        | 0          | 0           | Bacteria;Firmicutes;Bacilli;Bacillales;Bacillaceae;Aquibacillus;                                                   |
| otu0163 | 13         | 0.22        | 3          | 0.07        | Bacteria;Firmicutes;Bacilli;Bacillales;Bacillaceae;Bacillaceae_un;                                                 |
| otu0164 | 141        | 2.37        | 66         | 1.6         | Bacteria;Firmicutes;Bacilli;Bacillales;Bacillaceae;Bacillus;                                                       |
| otu0165 | 0          | 0           | 2          | 0.05        | Bacteria;Firmicutes;Bacilli;Bacillales;Bacillaceae;Fictibacillus;                                                  |
| otu0166 | 15         | 0.25        | 3          | 0.07        | Bacteria;Firmicutes;Bacilli;Bacillales;Bacillales_un;Bacillales_un;                                                |
| otu0167 | 0          | 0           | 2          | 0.05        | Bacteria;Firmicutes;Bacilli;Bacillales;Paenibacillaceae;Ammoniphilus;                                              |
| otu0168 | 0          | 0           | 1          | 0.02        | Bacteria;Firmicutes;Bacilli;Bacillales;Paenibacillaceae;Cohnella;                                                  |
| otu0169 | 0          | 0           | 2          | 0.05        | Bacteria;Firmicutes;Bacilli;Bacillales;Paenibacillaceae;Paenibacillaceae_un;                                       |
| otu0170 | 1          | 0.02        | 5          | 0.12        | Bacteria;Firmicutes;Bacilli;Bacillales;Paenibacillaceae;Paenibacillus;                                             |
| otu0171 | 0          | 0           | 2          | 0.05        | Bacteria;Firmicutes;Bacilli;Bacillales;Planococcaceae;Domibacillus;                                                |
| otu0172 | 104        | 1.75        | 0          | 0           | Bacteria;Firmicutes;Bacilli;Bacillales;Planococcaceae;Jeotgalibacillus;                                            |
| otu0173 | 0          | 0           | 1          | 0.02        | Bacteria;Firmicutes;Bacilli;Bacillales;Planococcaceae;Lysinibacillus;                                              |
| otu0174 | 1430       | 24.1        | 0          | 0           | Bacteria;Firmicutes;Bacilli;Bacillales;Planococcaceae;Paenisporosarcina;                                           |
| otu0175 | 1          | 0.02        | 0          | 0           | Bacteria;Firmicutes;Bacilli;Bacillales;Planococcaceae;Planococcaceae_ge;                                           |
| otu0176 | 14         | 0.24        | 0          | 0           | Bacteria;Firmicutes;Bacilli;Bacillales;Planococcaceae;Planococcaceae_un;                                           |
| otu0177 | 155        | 2.61        | 0          | 0           | Bacteria;Firmicutes;Bacilli;Bacillales;Sporolactobacillaceae;Salipaludibacillus;                                   |
| otu0178 | 0          | 0           | 1          | 0.02        | Bacteria;Firmicutes;Bacilli;Bacillales;Thermoactinomycetaceae;Shimazuella;                                         |
| otu0179 | 1          | 0.02        | 0          | 0           | Bacteria;Firmicutes;Bacilli;Bacilli_un;Bacilli_un;Bacilli_un;                                                      |
| otu0180 | 0          | 0           | 1          | 0.02        | Bacteria;Firmicutes;Bacilli;Lactobacillales;Streptococcaceae;Streptococcus;                                        |
| otu0181 | 0          | 0           | 1          | 0.02        | Bacteria;Firmicutes;Clostridia;Clostridiales;Christensenellaceae;uncultured;                                       |
| otu0182 | 0          | 0           | 14         | 0.34        | Bacteria;Firmicutes;Clostridia;Clostridiales;Clostridiaceae_1;Clostridiaceae_1_un;                                 |
| otu0183 | 0          | 0           | 24         | 0.58        | Bacteria;Firmicutes;Clostridia;Clostridiales;Clostridiaceae_1;Clostridium_sensu_stricto_1;                         |
| otu0184 | 0          | 0           | 2          | 0.05        | Bacteria;Firmicutes;Clostridia;Clostridiales;Clostridiaceae_1;Clostridium_sensu_stricto_10;                        |
| otu0185 | 0          | 0           | 2          | 0.05        | Bacteria;Firmicutes;Clostridia;Clostridiales;Clostridiaceae_1;Clostridium_sensu_stricto_12;                        |
| otu0186 | 0          | 0           | 1          | 0.02        | Bacteria;Firmicutes;Clostridia;Clostridiales;Clostridiaceae_1;Clostridium_sensu_stricto_17;                        |
| otu0187 | 0          | 0           | 1          | 0.02        | Bacteria;Firmicutes;Clostridia;Clostridiales;Clostridiaceae_1;Clostridium_sensu_stricto_18;                        |
| otu0188 | 1          | 0.02        | 1          | 0.02        | Bacteria;Firmicutes;Clostridia;Clostridiales;Clostridiaceae_1;Clostridium_sensu_stricto_7;                         |
| otu0189 | 0          | 0           | 2          | 0.05        | Bacteria;Firmicutes;Clostridia;Clostridiales;Clostridiaceae_1;Clostridium_sensu_stricto_8;                         |
| otu0190 | 0          | 0           | 1          | 0.02        | Bacteria;Firmicutes;Clostridia;Clostridiales;Clostridiaceae_1;Clostridium_sensu_stricto_9;                         |
| otu0191 | 0          | 0           | 1          | 0.02        | Bacteria;Firmicutes;Clostridia;Clostridiales;Clostridiaceae_1;Fonticella;                                          |
| otu0192 | 0          | 0           | 2          | 0.05        | Bacteria;Firmicutes;Clostridia;Clostridiales;Clostridiaceae_1;Oceanirhabdus;                                       |
| otu0193 | 0          | 0           | 3          | 0.07        | Bacteria;Firmicutes;Clostridia;Clostridiales;Clostridiaceae_1;uncultured;                                          |
| otu0194 | 1          | 0.02        | 2          | 0.05        | Bacteria;Firmicutes;Clostridia;Clostridiales;Clostridiaceae_4;Paramaledivibacter;                                  |
| otu0195 | 0          | 0           | 4          | 0.1         | Bacteria;Firmicutes;Clostridia;Clostridiales;Clostridiales_un;Clostridiales_un;                                    |
| otu0196 | 0          | 0           | 1          | 0.02        | Bacteria;Firmicutes;Clostridia;Clostridiales;Defluviitaleaceae;Defluviitaleaceae_UCG-011;                          |

|         |      |      |     |      |                                                                                                                                                         |
|---------|------|------|-----|------|---------------------------------------------------------------------------------------------------------------------------------------------------------|
| otu0197 | 1    | 0.02 | 0   | 0    | Bacteria;Firmicutes;Clostridia;Clostridiales;Family_XII;Family_XII_un;                                                                                  |
| otu0198 | 0    | 0    | 1   | 0.02 | Bacteria;Firmicutes;Clostridia;Clostridiales;Family_XVIII;uncultured;                                                                                   |
| otu0199 | 0    | 0    | 1   | 0.02 | Bacteria;Firmicutes;Clostridia;Clostridiales;Gracilibacteraceae;Lutispora;                                                                              |
| otu0200 | 0    | 0    | 3   | 0.07 | Bacteria;Firmicutes;Clostridia;Clostridiales;Heliobacteriaceae;Hydrogenispora;                                                                          |
| otu0201 | 0    | 0    | 1   | 0.02 | Bacteria;Firmicutes;Clostridia;Clostridiales;Lachnospiraceae;Epulopiscium;                                                                              |
| otu0202 | 1    | 0.02 | 8   | 0.19 | Bacteria;Firmicutes;Clostridia;Clostridiales;Lachnospiraceae;Lachnospiraceae_un;                                                                        |
| otu0203 | 0    | 0    | 1   | 0.02 | Bacteria;Firmicutes;Clostridia;Clostridiales;Lachnospiraceae;Lachnotalea;                                                                               |
| otu0204 | 0    | 0    | 2   | 0.05 | Bacteria;Firmicutes;Clostridia;Clostridiales;Lachnospiraceae;Mobilitalea;                                                                               |
| otu0205 | 0    | 0    | 1   | 0.02 | Bacteria;Firmicutes;Clostridia;Clostridiales;Lachnospiraceae;Tyzzrella_3;                                                                               |
| otu0206 | 1    | 0.02 | 0   | 0    | Bacteria;Firmicutes;Clostridia;Clostridiales;Peptococcaceae;Dehalobacterium;                                                                            |
| otu0207 | 0    | 0    | 1   | 0.02 | Bacteria;Firmicutes;Clostridia;Clostridiales;Peptococcaceae;Desulfurispora;                                                                             |
| otu0208 | 0    | 0    | 1   | 0.02 | Bacteria;Firmicutes;Clostridia;Clostridiales;Peptococcaceae;Peptococcaceae_un;                                                                          |
| otu0209 | 0    | 0    | 1   | 0.02 | Bacteria;Firmicutes;Clostridia;Clostridiales;Peptostreptococcaceae;Paraclostridium;                                                                     |
| otu0210 | 1    | 0.02 | 9   | 0.22 | Bacteria;Firmicutes;Clostridia;Clostridiales;Peptostreptococcaceae;Peptostreptococcaceae_un;                                                            |
| otu0211 | 0    | 0    | 18  | 0.44 | Bacteria;Firmicutes;Clostridia;Clostridiales;Peptostreptococcaceae;Romboutsia;                                                                          |
| otu0212 | 0    | 0    | 2   | 0.05 | Bacteria;Firmicutes;Clostridia;Clostridiales;Peptostreptococcaceae;Sporacetigenium;                                                                     |
| otu0213 | 1    | 0.02 | 0   | 0    | Bacteria;Firmicutes;Clostridia;Clostridiales;Peptostreptococcaceae;Tepidibacter;                                                                        |
| otu0214 | 0    | 0    | 1   | 0.02 | Bacteria;Firmicutes;Clostridia;Clostridiales;Ruminococcaceae;Caproiciproducens;                                                                         |
| otu0215 | 0    | 0    | 2   | 0.05 | Bacteria;Firmicutes;Clostridia;Clostridiales;Ruminococcaceae;Ruminiclostridium_1;                                                                       |
| otu0216 | 0    | 0    | 2   | 0.05 | Bacteria;Firmicutes;Clostridia;Clostridiales;Ruminococcaceae;Ruminococcaceae_UCG-012;                                                                   |
| otu0217 | 0    | 0    | 11  | 0.27 | Bacteria;Firmicutes;Clostridia;Clostridiales;Ruminococcaceae;Ruminococcaceae_un;                                                                        |
| otu0218 | 0    | 0    | 1   | 0.02 | Bacteria;Firmicutes;Clostridia;Clostridiales;Ruminococcaceae;uncultured;                                                                                |
| otu0219 | 0    | 0    | 2   | 0.05 | Bacteria;Firmicutes;Clostridia;Clostridiales;Syntrophomonadaceae;Syntrophomonadaceae_un;                                                                |
| otu0220 | 0    | 0    | 1   | 0.02 | Bacteria;Firmicutes;Erysipelotrichia;Erysipelotrichales;Erysipelotrichaceae;ZOR0006;                                                                    |
| otu0221 | 0    | 0    | 2   | 0.05 | Bacteria;Firmicutes;Negativicutes;Selenomonadales;uncultured;uncultured_ge;                                                                             |
| otu0222 | 0    | 0    | 1   | 0.02 | Bacteria;Firmicutes;Negativicutes;Selenomonadales;Veillonellaceae;Veillonellaceae_un;                                                                   |
|         | 1966 | 33.1 | 227 | 5.5  |                                                                                                                                                         |
| otu0223 | 0    | 0    | 1   | 0.02 | Bacteria;Fusobacteria;Fusobacteriia;Fusobacteriales;Fusobacteriaceae;Cetobacterium;                                                                     |
| otu0224 | 0    | 0    | 1   | 0.02 | Bacteria;Fusobacteria;Fusobacteriia;Fusobacteriales;Fusobacteriaceae;Psychrilyobacter;                                                                  |
|         | 0    | 0    | 2   | 0.05 |                                                                                                                                                         |
| otu0225 | 8    | 0.13 | 0   | 0    | Bacteria;Gemmatimonadetes;AKAU4049;AKAU4049_or;AKAU4049_fa;AKAU4049_ge;                                                                                 |
| otu0226 | 3    | 0.05 | 11  | 0.27 | Bacteria;Gemmatimonadetes;BD2-11_terrestrial_group;BD2-11_terrestrial_group_or;BD2-11_terrestrial_group_fa;BD2-11_terrestrial_group_ge;                 |
| otu0227 | 1    | 0.02 | 0   | 0    | Bacteria;Gemmatimonadetes;Gemmatimonadetes;Gemmatimonadales;Gemmatimonadaceae;Gemmatimonadaceae_un;                                                     |
| otu0228 | 5    | 0.08 | 9   | 0.22 | Bacteria;Gemmatimonadetes;Gemmatimonadetes;Gemmatimonadales;Gemmatimonadaceae;uncultured;                                                               |
| otu0229 | 0    | 0    | 1   | 0.02 | Bacteria;Gemmatimonadetes;Gemmatimonadetes_un;Gemmatimonadetes_un;Gemmatimonadetes_un;Gemmatimonadetes_un;                                              |
| otu0230 | 3    | 0.05 | 0   | 0    | Bacteria;Gemmatimonadetes;MD2902-B12;MD2902-B12_or;MD2902-B12_fa;MD2902-B12_ge;                                                                         |
| otu0231 | 17   | 0.29 | 29  | 0.7  | Bacteria;Gemmatimonadetes;PAUC43f_marine_benthic_group;PAUC43f_marine_benthic_group_or;PAUC43f_marine_benthic_group_fa;PAUC43f_marine_benthic_group_ge; |
|         | 37   | 0.62 | 50  | 1.21 |                                                                                                                                                         |
| otu0232 | 3    | 0.05 | 0   | 0    | Bacteria;GN01;GN01_cl;GN01_or;GN01_fa;GN01_ge;                                                                                                          |
|         | 3    | 0.05 | 0   | 0    |                                                                                                                                                         |
| otu0233 | 1    | 0.02 | 0   | 0    | Bacteria;Halanaerobiaeota;Halanaerobiiia;Halanaerobiales;Halobacteroidaceae;Orenia;                                                                     |
| otu0234 | 0    | 0    | 1   | 0.02 | Bacteria;Halanaerobiaeota;Halanaerobiiia;Halanaerobiales;Halobacteroidaceae;uncultured;                                                                 |
|         | 1    | 0.02 | 1   | 0.02 |                                                                                                                                                         |
| otu0235 | 0    | 0    | 4   | 0.1  | Bacteria;Hydrogenedentes;Hydrogenedentia;Hydrogenedentiales;Hydrogenedensaceae;Hydrogenedensaceae_ge;                                                   |
|         | 0    | 0    | 4   | 0.1  |                                                                                                                                                         |
| otu0236 | 2    | 0.03 | 5   | 0.12 | Bacteria;Kiritimatiellaota;Kiritimatiellae;Kiritimatiellales;Kiritimatiellaceae;R76-B128;                                                               |
| otu0237 | 2    | 0.03 | 3   | 0.07 | Bacteria;Kiritimatiellaota;Kiritimatiellae;WCHB1-41;WCHB1-41_fa;WCHB1-41_ge;                                                                            |
|         | 4    | 0.07 | 8   | 0.19 |                                                                                                                                                         |
| otu0238 | 1    | 0.02 | 0   | 0    | Bacteria;Latescibacteria;Latescibacteria;Latescibacterales;Latescibacteraceae;Candidatus_Latescibacter;                                                 |
| otu0239 | 15   | 0.25 | 4   | 0.1  | Bacteria;Latescibacteria;Latescibacteria;Latescibacterales;Latescibacteraceae;Latescibacteraceae_ge;                                                    |
| otu0240 | 18   | 0.3  | 15  | 0.36 | Bacteria;Latescibacteria;Latescibacteria_cl;Latescibacteria_or;Latescibacteria_fa;Latescibacteria_ge;                                                   |
|         | 34   | 0.57 | 19  | 0.46 |                                                                                                                                                         |
| otu0241 | 0    | 0    | 1   | 0.02 | Bacteria;Modulibacteria;Moduliflexia;Moduliflexales;Moduliflexaceae;Moduliflexaceae_ge;                                                                 |
|         | 0    | 0    | 1   | 0.02 |                                                                                                                                                         |
| otu0242 | 2    | 0.03 | 9   | 0.22 | Bacteria;Nitrospinae;Nitrospina;Nitrospinales;Nitrospinaceae;Nitrospina;                                                                                |
| otu0243 | 0    | 0    | 2   | 0.05 | Bacteria;Nitrospinae;Nitrospina;Nitrospinales;Nitrospinaceae;Nitrospinaceae_un;                                                                         |
| otu0244 | 5    | 0.08 | 2   | 0.05 | Bacteria;Nitrospinae;P9X2b3D02;P9X2b3D02_or;P9X2b3D02_fa;P9X2b3D02_ge;                                                                                  |
|         | 7    | 0.12 | 13  | 0.32 |                                                                                                                                                         |
| otu0245 | 1    | 0.02 | 0   | 0    | Bacteria;Nitrospirae;4-29-1;4-29-1_or;4-29-1_fa;4-29-1_ge;                                                                                              |
| otu0246 | 0    | 0    | 30  | 0.73 | Bacteria;Nitrospirae;Nitrospira;Nitrospirales;Nitrospiraceae;Nitrospira;                                                                                |
| otu0247 | 3    | 0.05 | 0   | 0    | Bacteria;Nitrospirae;Thermodesulfovibrionia;Magnetobacteriales;Magnetobacteriaceae;Magnetobacteriaceae_un;                                              |
| otu0248 | 1    | 0.02 | 1   | 0.02 | Bacteria;Nitrospirae;Thermodesulfovibrionia;Thermodesulfovibrionales;Thermodesulfovibrionaceae;Thermodesulfovibrionaceae;                               |
| otu0249 | 7    | 0.12 | 1   | 0.02 | Bacteria;Nitrospirae;Thermodesulfovibrionia;Thermodesulfovibrionia_un;Thermodesulfovibrionia_un;Thermodesulfovibrionia_un;                              |
| otu0250 | 49   | 0.82 | 37  | 0.9  | Bacteria;Nitrospirae;Thermodesulfovibrionia;uncultured;uncultured_fa;uncultured_ge;                                                                     |
|         | 61   | 1.03 | 69  | 1.67 |                                                                                                                                                         |
| otu0251 | 7    | 0.12 | 1   | 0.02 | Bacteria;Omnitrophicaeota;Omnitrophicaeota_cl;Omnitrophicaeota_or;Omnitrophicaeota_fa;Omnitrophicaeota_ge;                                              |
|         | 7    | 0.12 | 1   | 0.02 |                                                                                                                                                         |
| otu0252 | 3    | 0.05 | 0   | 0    | Bacteria;Patescibacteria;ABY1;ABY1_un;ABY1_un;ABY1_un;                                                                                                  |
| otu0253 | 1    | 0.02 | 0   | 0    | Bacteria;Patescibacteria;ABY1;Candidatus_Falkowbacteria;Candidatus_Falkowbacteria_fa;Candidatus_Falkowbacteria_ge;                                      |
| otu0254 | 1    | 0.02 | 1   | 0.02 | Bacteria;Patescibacteria;ABY1;Candidatus_Kerfeldbacteria;Candidatus_Kerfeldbacteria_fa;Candidatus_Kerfeldbacteria_ge;                                   |

|         |    |      |     |      |                                                                                                                                        |
|---------|----|------|-----|------|----------------------------------------------------------------------------------------------------------------------------------------|
| otu0255 | 3  | 0.05 | 0   | 0    | Bacteria;Patescibacteria;ABY1;Candidatus_Komeilibacteria;Candidatus_Komeilibacteria_fa;Candidatus_Komeilibacteria_ge;                  |
| otu0256 | 1  | 0.02 | 0   | 0    | Bacteria;Patescibacteria;ABY1;Candidatus_Uhrbacteria;Candidatus_Uhrbacteria_fa;Candidatus_Uhrbacteria_ge;                              |
| otu0257 | 2  | 0.03 | 8   | 0.19 | Bacteria;Patescibacteria;Gracilibacteria;Candidatus_Peregrinibacteria;Candidatus_Peregrinibacteria_fa;Candidatus_Peregrinibacteria_ge; |
| otu0258 | 2  | 0.03 | 6   | 0.15 | Bacteria;Patescibacteria;Gracilibacteria;Gracilibacteria_or;Gracilibacteria_fa;Gracilibacteria_ge;                                     |
| otu0259 | 1  | 0.02 | 0   | 0    | Bacteria;Patescibacteria;Microgenomatia;Candidatus_Chisholmbacteria;Candidatus_Chisholmbacteria_fa;Candidatus_Chisholmbacteria_ge;     |
| otu0260 | 1  | 0.02 | 0   | 0    | Bacteria;Patescibacteria;Microgenomatia;Candidatus_Curtissbacteria;Candidatus_Curtissbacteria_fa;Candidatus_Curtissbacteria_ge;        |
| otu0261 | 1  | 0.02 | 0   | 0    | Bacteria;Patescibacteria;Microgenomatia;Candidatus_Gottesmanbacteria;Candidatus_Gottesmanbacteria_fa;Candidatus_Gottesmanbacteria_ge;  |
| otu0262 | 1  | 0.02 | 0   | 0    | Bacteria;Patescibacteria;Microgenomatia;Candidatus_Woesebacteria;Candidatus_Woesebacteria_fa;Candidatus_Woesebacteria_ge;              |
| otu0263 | 2  | 0.03 | 0   | 0    | Bacteria;Patescibacteria;Microgenomatia;Candidatus_Woykebacteria;Candidatus_Woykebacteria_fa;Candidatus_Woykebacteria_ge;              |
| otu0264 | 1  | 0.02 | 0   | 0    | Bacteria;Patescibacteria;Microgenomatia;Microgenomatia_un;Microgenomatia_un;Microgenomatia_un;                                         |
| otu0265 | 1  | 0.02 | 0   | 0    | Bacteria;Patescibacteria;Parcubacteria;Candidatus_Campbellbacteria;Candidatus_Campbellbacteria_fa;Candidatus_Campbellbacteria_ge;      |
| otu0266 | 0  | 0    | 2   | 0.05 | Bacteria;Patescibacteria;Parcubacteria;Parcubacteria_un;Parcubacteria_un;Parcubacteria_un;                                             |
| otu0267 | 1  | 0.02 | 6   | 0.15 | Bacteria;Patescibacteria;Saccharimonadia;Saccharimonadales;Saccharimonadales_fa;Saccharimonadales_ge;                                  |
|         | 22 | 0.37 | 23  | 0.56 |                                                                                                                                        |
| otu0268 | 0  | 0    | 1   | 0.02 | Bacteria;Planctomycetes;BD7-11;BD7-11_or;BD7-11_fa;BD7-11_ge;                                                                          |
| otu0269 | 0  | 0    | 1   | 0.02 | Bacteria;Planctomycetes;Brocadia;Brocadiales;Scalindua;Scalindua_fa;Scalindua_ge;                                                      |
| otu0270 | 2  | 0.03 | 23  | 0.56 | Bacteria;Planctomycetes;OM190;OM190_or;OM190_fa;OM190_ge;                                                                              |
| otu0271 | 3  | 0.05 | 5   | 0.12 | Bacteria;Planctomycetes;Phycisphaerae;C86;C86_fa;C86_ge;                                                                               |
| otu0272 | 1  | 0.02 | 3   | 0.07 | Bacteria;Planctomycetes;Phycisphaerae;CCM11a;CCM11a_fa;CCM11a_ge;                                                                      |
| otu0273 | 0  | 0    | 15  | 0.36 | Bacteria;Planctomycetes;Phycisphaerae;MSBL9;4572-13;4572-13_ge;                                                                        |
| otu0274 | 0  | 0    | 1   | 0.02 | Bacteria;Planctomycetes;Phycisphaerae;MSBL9;L21-RPul-D3;L21-RPul-D3_ge;                                                                |
| otu0275 | 0  | 0    | 2   | 0.05 | Bacteria;Planctomycetes;Phycisphaerae;MSBL9;MSBL9_un;MSBL9_un;                                                                         |
| otu0276 | 9  | 0.15 | 4   | 0.1  | Bacteria;Planctomycetes;Phycisphaerae;MSBL9;SG8-4;SG8-4_ge;                                                                            |
| otu0277 | 0  | 0    | 1   | 0.02 | Bacteria;Planctomycetes;Phycisphaerae;MSBL9;SM23-30;SM23-30_ge;                                                                        |
| otu0278 | 3  | 0.05 | 0   | 0    | Bacteria;Planctomycetes;Phycisphaerae;Phycisphaerae_un;Phycisphaerae_un;Phycisphaerae_un;                                              |
| otu0279 | 1  | 0.02 | 2   | 0.05 | Bacteria;Planctomycetes;Phycisphaerae;Phycisphaerales;AKAU3564_sediment_group;AKAU3564_sediment_group_ge;                              |
| otu0280 | 0  | 0    | 1   | 0.02 | Bacteria;Planctomycetes;Phycisphaerae;Phycisphaerales;Phycisphaerales_un;Phycisphaerales_un;                                           |
| otu0281 | 0  | 0    | 2   | 0.05 | Bacteria;Planctomycetes;Phycisphaerae;Phycisphaerales;Phycisphaerales_un;Phycisphaerales_un;                                           |
| otu0282 | 0  | 0    | 6   | 0.15 | Bacteria;Planctomycetes;Phycisphaerae;Phycisphaerales;Phycisphaerales_un;Phycisphaerales_un;                                           |
| otu0283 | 3  | 0.05 | 23  | 0.56 | Bacteria;Planctomycetes;Phycisphaerae;Phycisphaerales;Phycisphaerales_un;Phycisphaerales_un;                                           |
| otu0284 | 0  | 0    | 2   | 0.05 | Bacteria;Planctomycetes;Phycisphaerae;Phycisphaerales;Phycisphaerales_un;Phycisphaerales_un;                                           |
| otu0285 | 0  | 0    | 1   | 0.02 | Bacteria;Planctomycetes;Phycisphaerae;Pla1_lineage;Pla1_lineage_fa;Pla1_lineage_ge;                                                    |
| otu0286 | 0  | 0    | 10  | 0.24 | Bacteria;Planctomycetes;Pla3_lineage;Pla3_lineage_or;Pla3_lineage_fa;Pla3_lineage_ge;                                                  |
| otu0287 | 0  | 0    | 1   | 0.02 | Bacteria;Planctomycetes;Pla4_lineage;Pla4_lineage_or;Pla4_lineage_fa;Pla4_lineage_ge;                                                  |
| otu0288 | 3  | 0.05 | 55  | 1.33 | Bacteria;Planctomycetes;Planctomycetacia;Pirellulales;Pirellulales_un;Pirellulales_un;                                                 |
| otu0289 | 2  | 0.03 | 8   | 0.19 | Bacteria;Planctomycetes;Planctomycetacia;Pirellulales;Pirellulales_un;Pirellulales_un;                                                 |
| otu0290 | 23 | 0.39 | 41  | 0.99 | Bacteria;Planctomycetes;Planctomycetacia;Pirellulales;Pirellulales_un;Pirellulales_un;                                                 |
| otu0291 | 0  | 0    | 3   | 0.07 | Bacteria;Planctomycetes;Planctomycetacia;Pirellulales;Pirellulales_un;Pirellulales_un;                                                 |
| otu0292 | 9  | 0.15 | 81  | 1.96 | Bacteria;Planctomycetes;Planctomycetacia;Pirellulales;Pirellulales_un;Pirellulales_un;                                                 |
| otu0293 | 3  | 0.05 | 44  | 1.07 | Bacteria;Planctomycetes;Planctomycetacia;Pirellulales;Pirellulales_un;Pirellulales_un;                                                 |
| otu0294 | 0  | 0    | 18  | 0.44 | Bacteria;Planctomycetes;Planctomycetacia;Pirellulales;Pirellulales_un;Pirellulales_un;                                                 |
| otu0295 | 2  | 0.03 | 7   | 0.17 | Bacteria;Planctomycetes;Planctomycetacia;Pirellulales;Pirellulales_un;Pirellulales_un;                                                 |
| otu0296 | 0  | 0    | 4   | 0.1  | Bacteria;Planctomycetes;Planctomycetacia;Planctomycetacia_un;Planctomycetacia_un;Planctomycetacia_un;                                  |
| otu0297 | 1  | 0.02 | 8   | 0.19 | Bacteria;Planctomycetes;Planctomycetacia;Planctomycetacia_un;Planctomycetacia_un;Planctomycetacia_un;                                  |
| otu0298 | 1  | 0.02 | 4   | 0.1  | Bacteria;Planctomycetes;Planctomycetacia;Planctomycetacia_un;Planctomycetacia_un;Planctomycetacia_un;                                  |
| otu0299 | 0  | 0    | 1   | 0.02 | Bacteria;Planctomycetes;Planctomycetacia;Planctomycetacia_un;Planctomycetacia_un;Planctomycetacia_un;                                  |
| otu0300 | 0  | 0    | 2   | 0.05 | Bacteria;Planctomycetes;Planctomycetacia;Planctomycetacia_un;Planctomycetacia_un;Planctomycetacia_un;                                  |
| otu0301 | 0  | 0    | 1   | 0.02 | Bacteria;Planctomycetes;Planctomycetacia;Planctomycetacia_un;Planctomycetacia_un;Planctomycetacia_un;                                  |
| otu0302 | 1  | 0.02 | 0   | 0    | Bacteria;Planctomycetes;Planctomycetacia;Planctomycetacia_un;Planctomycetacia_un;Planctomycetacia_un;                                  |
| otu0303 | 1  | 0.02 | 4   | 0.1  | Bacteria;Planctomycetes;Planctomycetacia;Planctomycetacia_un;Planctomycetacia_un;Planctomycetacia_un;                                  |
| otu0304 | 5  | 0.08 | 1   | 0.02 | Bacteria;Planctomycetes;SPG12-343-353-B69;SPG12-343-353-B69_or;SPG12-343-353-B69_fa;SPG12-343-353-B69_ge;                              |
| otu0305 | 1  | 0.02 | 0   | 0    | Bacteria;Planctomycetes;vadinHA49;vadinHA49_or;vadinHA49_fa;vadinHA49_ge;                                                              |
|         | 74 | 1.24 | 386 | 9.36 |                                                                                                                                        |
| otu0306 | 0  | 0    | 1   | 0.02 | Bacteria;Proteobacteria;Alphaproteobacteria;Acetobacteriales;Acetobacteraceae;Acetobacteraceae_un;                                     |
| otu0307 | 0  | 0    | 1   | 0.02 | Bacteria;Proteobacteria;Alphaproteobacteria;Alphaproteobacteria_Incertae_Sedis;Unknown_Family;uncultured;                              |
| otu0308 | 21 | 0.35 | 100 | 2.42 | Bacteria;Proteobacteria;Alphaproteobacteria;Alphaproteobacteria_un;Alphaproteobacteria_un;Alphaproteobacteria_un;                      |
| otu0309 | 0  | 0    | 10  | 0.24 | Bacteria;Proteobacteria;Alphaproteobacteria;Caulobacteriales;Parvularculaceae;uncultured;                                              |
| otu0310 | 0  | 0    | 1   | 0.02 | Bacteria;Proteobacteria;Alphaproteobacteria;Holosporales;Holosporaceae;Holosporaceae_un;                                               |
| otu0311 | 1  | 0.02 | 0   | 0    | Bacteria;Proteobacteria;Alphaproteobacteria;Mycoplasmatales;Mycoplasmatales_un;Mycoplasmatales_un;                                     |
| otu0312 | 0  | 0    | 1   | 0.02 | Bacteria;Proteobacteria;Alphaproteobacteria;Parvibaculales;Parvibaculaceae;uncultured;                                                 |
| otu0313 | 0  | 0    | 6   | 0.15 | Bacteria;Proteobacteria;Alphaproteobacteria;Parvibaculales;Parvibaculales_un;Parvibaculales_un;                                        |
| otu0314 | 0  | 0    | 35  | 0.85 | Bacteria;Proteobacteria;Alphaproteobacteria;Parvibaculales;PS1_clade;PS1_clade_ge;                                                     |
| otu0315 | 0  | 0    | 3   | 0.07 | Bacteria;Proteobacteria;Alphaproteobacteria;Rhizobiales;Beijerinckiales;Beijerinckiales_un;                                            |
| otu0316 | 0  | 0    | 2   | 0.05 | Bacteria;Proteobacteria;Alphaproteobacteria;Rhizobiales;Beijerinckiales;Beijerinckiales_un;                                            |
| otu0317 | 2  | 0.03 | 102 | 2.47 | Bacteria;Proteobacteria;Alphaproteobacteria;Rhizobiales;Hyphomicrobiales;Hyphomicrobiales_un;                                          |
| otu0318 | 0  | 0    | 13  | 0.32 | Bacteria;Proteobacteria;Alphaproteobacteria;Rhizobiales;Hyphomicrobiales;Hyphomicrobiales_un;                                          |
| otu0319 | 0  | 0    | 2   | 0.05 | Bacteria;Proteobacteria;Alphaproteobacteria;Rhizobiales;Hyphomicrobiales;Hyphomicrobiales_un;                                          |
| otu0320 | 87 | 1.46 | 12  | 0.29 | Bacteria;Proteobacteria;Alphaproteobacteria;Rhizobiales;Hyphomicrobiales;Hyphomicrobiales_un;                                          |
| otu0321 | 0  | 0    | 2   | 0.05 | Bacteria;Proteobacteria;Alphaproteobacteria;Rhizobiales;KF-JG30-B3;KF-JG30-B3_ge;                                                      |
| otu0322 | 4  | 0.07 | 106 | 2.57 | Bacteria;Proteobacteria;Alphaproteobacteria;Rhizobiales;Methylobacteriales;Methylobacteriales_un;                                      |
| otu0323 | 31 | 0.52 | 16  | 0.39 | Bacteria;Proteobacteria;Alphaproteobacteria;Rhizobiales;Methylobacteriales;Methylobacteriales_un;                                      |
| otu0324 | 9  | 0.15 | 6   | 0.15 | Bacteria;Proteobacteria;Alphaproteobacteria;Rhizobiales;Methylobacteriales;Methylobacteriales_un;                                      |

|         |     |      |     |      |                                                                                                                   |
|---------|-----|------|-----|------|-------------------------------------------------------------------------------------------------------------------|
| otu0325 | 0   | 0    | 9   | 0.22 | Bacteria;Proteobacteria;Alphaproteobacteria;Rhizobiales;Rhizobiaceae;Cohaesibacter;                               |
| otu0326 | 0   | 0    | 14  | 0.34 | Bacteria;Proteobacteria;Alphaproteobacteria;Rhizobiales;Rhizobiaceae;Pseudahrensia;                               |
| otu0327 | 0   | 0    | 3   | 0.07 | Bacteria;Proteobacteria;Alphaproteobacteria;Rhizobiales;Rhizobiaceae;Rhizobiaceae_un;                             |
| otu0328 | 0   | 0    | 13  | 0.32 | Bacteria;Proteobacteria;Alphaproteobacteria;Rhizobiales;Rhizobiaceae;uncultured;                                  |
| otu0329 | 2   | 0.03 | 6   | 0.15 | Bacteria;Proteobacteria;Alphaproteobacteria;Rhizobiales;Rhizobiales_Incertae_Sedis;Andersenella;                  |
| otu0330 | 0   | 0    | 13  | 0.32 | Bacteria;Proteobacteria;Alphaproteobacteria;Rhizobiales;Rhizobiales_Incertae_Sedis;Bauldia;                       |
| otu0331 | 0   | 0    | 1   | 0.02 | Bacteria;Proteobacteria;Alphaproteobacteria;Rhizobiales;Rhizobiales_Incertae_Sedis;Rhizobiales_Incertae_Sedis_un; |
| otu0332 | 0   | 0    | 1   | 0.02 | Bacteria;Proteobacteria;Alphaproteobacteria;Rhizobiales;Rhizobiales_Incertae_Sedis;uncultured;                    |
| otu0333 | 5   | 0.08 | 33  | 0.8  | Bacteria;Proteobacteria;Alphaproteobacteria;Rhizobiales;Rhizobiales_un;Rhizobiales_un;                            |
| otu0334 | 0   | 0    | 1   | 0.02 | Bacteria;Proteobacteria;Alphaproteobacteria;Rhizobiales;Xanthobacteraceae;Xanthobacteraceae_un;                   |
| otu0335 | 0   | 0    | 1   | 0.02 | Bacteria;Proteobacteria;Alphaproteobacteria;Rhodobacterales;Rhodobacteraceae;Boseongicola;                        |
| otu0336 | 0   | 0    | 1   | 0.02 | Bacteria;Proteobacteria;Alphaproteobacteria;Rhodobacterales;Rhodobacteraceae;Dinoroseobacter;                     |
| otu0337 | 0   | 0    | 2   | 0.05 | Bacteria;Proteobacteria;Alphaproteobacteria;Rhodobacterales;Rhodobacteraceae;Ketogulonigenium;                    |
| otu0338 | 254 | 4.27 | 0   | 0    | Bacteria;Proteobacteria;Alphaproteobacteria;Rhodobacterales;Rhodobacteraceae;Oceanibulbus;                        |
| otu0339 | 25  | 0.42 | 0   | 0    | Bacteria;Proteobacteria;Alphaproteobacteria;Rhodobacterales;Rhodobacteraceae;Paracoccus;                          |
| otu0340 | 4   | 0.07 | 0   | 0    | Bacteria;Proteobacteria;Alphaproteobacteria;Rhodobacterales;Rhodobacteraceae;Pelagimonas;                         |
| otu0341 | 66  | 1.11 | 19  | 0.46 | Bacteria;Proteobacteria;Alphaproteobacteria;Rhodobacterales;Rhodobacteraceae;Rhodobacteraceae_un;                 |
| otu0342 | 0   | 0    | 12  | 0.29 | Bacteria;Proteobacteria;Alphaproteobacteria;Rhodobacterales;Rhodobacteraceae;Ruegeria;                            |
| otu0343 | 68  | 1.14 | 0   | 0    | Bacteria;Proteobacteria;Alphaproteobacteria;Rhodobacterales;Rhodobacteraceae;Sedimentitalea;                      |
| otu0344 | 0   | 0    | 25  | 0.61 | Bacteria;Proteobacteria;Alphaproteobacteria;Rhodobacterales;Rhodobacteraceae;Silicimonas;                         |
| otu0345 | 0   | 0    | 1   | 0.02 | Bacteria;Proteobacteria;Alphaproteobacteria;Rhodobacterales;Rhodobacteraceae;uncultured;                          |
| otu0346 | 0   | 0    | 1   | 0.02 | Bacteria;Proteobacteria;Alphaproteobacteria;Rhodospirillales;Magnetospiraceae;uncultured;                         |
| otu0347 | 0   | 0    | 73  | 1.77 | Bacteria;Proteobacteria;Alphaproteobacteria;Rhodovibrionales;Kiloniellaceae;Kiloniellaceae_un;                    |
| otu0348 | 0   | 0    | 4   | 0.1  | Bacteria;Proteobacteria;Alphaproteobacteria;Rhodovibrionales;Kiloniellaceae;Limibacillus;                         |
| otu0349 | 3   | 0.05 | 118 | 2.86 | Bacteria;Proteobacteria;Alphaproteobacteria;Rhodovibrionales;Kiloniellaceae;uncultured;                           |
| otu0350 | 0   | 0    | 1   | 0.02 | Bacteria;Proteobacteria;Alphaproteobacteria;Rhodovibrionales;Rhodovibrionales_un;Rhodovibrionales_un;             |
| otu0351 | 0   | 0    | 1   | 0.02 | Bacteria;Proteobacteria;Alphaproteobacteria;SAR11_clade;Clade_I;Clade_Ib;                                         |
| otu0352 | 2   | 0.03 | 3   | 0.07 | Bacteria;Proteobacteria;Alphaproteobacteria;Sneathiellales;Sneathiellaceae;AT-s3-44;                              |
| otu0353 | 0   | 0    | 2   | 0.05 | Bacteria;Proteobacteria;Alphaproteobacteria;Sphingomonadales;Sphingomonadaceae;Altererythrobacter;                |
| otu0354 | 0   | 0    | 1   | 0.02 | Bacteria;Proteobacteria;Alphaproteobacteria;Sphingomonadales;Sphingomonadaceae;Erythrobacter;                     |
| otu0355 | 0   | 0    | 1   | 0.02 | Bacteria;Proteobacteria;Alphaproteobacteria;Sphingomonadales;Sphingomonadaceae;Novosphingobium;                   |
| otu0356 | 0   | 0    | 3   | 0.07 | Bacteria;Proteobacteria;Alphaproteobacteria;Sphingomonadales;Sphingomonadaceae;Sphingomonadaceae_un;              |
| otu0357 | 1   | 0.02 | 2   | 0.05 | Bacteria;Proteobacteria;Alphaproteobacteria;uncultured;uncultured_fa;uncultured_ge;                               |
| otu0358 | 0   | 0    | 1   | 0.02 | Bacteria;Proteobacteria;Deltaproteobacteria;Bdellovibrionales;Bacteriovoracaceae;Bacteriovoracaceae_un;           |
| otu0359 | 1   | 0.02 | 0   | 0    | Bacteria;Proteobacteria;Deltaproteobacteria;Bradymonadales;Bradymonadales_fa;Bradymonadales_ge;                   |
| otu0360 | 0   | 0    | 1   | 0.02 | Bacteria;Proteobacteria;Deltaproteobacteria;Bradymonadales;Bradymonadales_un;Bradymonadales_un;                   |
| otu0361 | 0   | 0    | 6   | 0.15 | Bacteria;Proteobacteria;Deltaproteobacteria;Deltaproteobacteria_Incertae_Sedis;Unknown_Family;Deferrisoma;        |
| otu0362 | 16  | 0.27 | 28  | 0.68 | Bacteria;Proteobacteria;Deltaproteobacteria;Deltaproteobacteria_un;Deltaproteobacteria_un;Deltaproteobacteria_un; |
| otu0363 | 18  | 0.3  | 8   | 0.19 | Bacteria;Proteobacteria;Deltaproteobacteria;Desulfarculales;Desulfarculaceae;Desulfatiglan;                       |
| otu0364 | 0   | 0    | 5   | 0.12 | Bacteria;Proteobacteria;Deltaproteobacteria;Desulfarculales;Desulfarculaceae;uncultured;                          |
| otu0365 | 0   | 0    | 1   | 0.02 | Bacteria;Proteobacteria;Deltaproteobacteria;Desulfobacterales;Desulfobacteraceae;Candidatus_Magnetomorum;         |
| otu0366 | 14  | 0.24 | 10  | 0.24 | Bacteria;Proteobacteria;Deltaproteobacteria;Desulfobacterales;Desulfobacteraceae;Desulfobacteraceae_un;           |
| otu0367 | 0   | 0    | 8   | 0.19 | Bacteria;Proteobacteria;Deltaproteobacteria;Desulfobacterales;Desulfobacteraceae;Desulfofrigus;                   |
| otu0368 | 0   | 0    | 4   | 0.1  | Bacteria;Proteobacteria;Deltaproteobacteria;Desulfobacterales;Desulfobacteraceae;Desulfonema;                     |
| otu0369 | 0   | 0    | 2   | 0.05 | Bacteria;Proteobacteria;Deltaproteobacteria;Desulfobacterales;Desulfobacteraceae;Desulfosarcina;                  |
| otu0370 | 23  | 0.39 | 5   | 0.12 | Bacteria;Proteobacteria;Deltaproteobacteria;Desulfobacterales;Desulfobacteraceae;SEEP-SRB1;                       |
| otu0371 | 11  | 0.19 | 28  | 0.68 | Bacteria;Proteobacteria;Deltaproteobacteria;Desulfobacterales;Desulfobacteraceae;Sva0081_sediment_group;          |
| otu0372 | 0   | 0    | 9   | 0.22 | Bacteria;Proteobacteria;Deltaproteobacteria;Desulfobacterales;Desulfobacteraceae;uncultured;                      |
| otu0373 | 1   | 0.02 | 17  | 0.41 | Bacteria;Proteobacteria;Deltaproteobacteria;Desulfobacterales;Desulfobulbaceae;Desulfobulbaceae_un;               |
| otu0374 | 0   | 0    | 2   | 0.05 | Bacteria;Proteobacteria;Deltaproteobacteria;Desulfobacterales;Desulfobulbaceae;Desulfocapsa;                      |
| otu0375 | 0   | 0    | 3   | 0.07 | Bacteria;Proteobacteria;Deltaproteobacteria;Desulfobacterales;Desulfobulbaceae;Desulfopila;                       |
| otu0376 | 3   | 0.05 | 17  | 0.41 | Bacteria;Proteobacteria;Deltaproteobacteria;Desulfobacterales;Desulfobulbaceae;uncultured;                        |
| otu0377 | 0   | 0    | 2   | 0.05 | Bacteria;Proteobacteria;Deltaproteobacteria;Desulfuromonadales;Desulfuromonadaceae;Pelobacter;                    |
| otu0378 | 0   | 0    | 10  | 0.24 | Bacteria;Proteobacteria;Deltaproteobacteria;Desulfuromonadales;Desulfuromonadales_un;Desulfuromonadales_un;       |
| otu0379 | 0   | 0    | 8   | 0.19 | Bacteria;Proteobacteria;Deltaproteobacteria;Desulfuromonadales;Sva1033;Sva1033_ge;                                |
| otu0380 | 11  | 0.19 | 0   | 0    | Bacteria;Proteobacteria;Deltaproteobacteria;DTB120;DTB120_fa;DTB120_ge;                                           |
| otu0381 | 3   | 0.05 | 4   | 0.1  | Bacteria;Proteobacteria;Deltaproteobacteria;MBNT15;MBNT15_fa;MBNT15_ge;                                           |
| otu0382 | 2   | 0.03 | 3   | 0.07 | Bacteria;Proteobacteria;Deltaproteobacteria;Myxococcales;bacteriap25;bacteriap25_ge;                              |
| otu0383 | 1   | 0.02 | 1   | 0.02 | Bacteria;Proteobacteria;Deltaproteobacteria;Myxococcales;Blfdi19;Blfdi19_ge;                                      |
| otu0384 | 1   | 0.02 | 0   | 0    | Bacteria;Proteobacteria;Deltaproteobacteria;Myxococcales;Eel-36e1D6;Eel-36e1D6_ge;                                |
| otu0385 | 0   | 0    | 2   | 0.05 | Bacteria;Proteobacteria;Deltaproteobacteria;Myxococcales;Haliangiaceae;Haliangium;                                |
| otu0386 | 0   | 0    | 1   | 0.02 | Bacteria;Proteobacteria;Deltaproteobacteria;Myxococcales;MidBa8;MidBa8_ge;                                        |
| otu0387 | 0   | 0    | 1   | 0.02 | Bacteria;Proteobacteria;Deltaproteobacteria;Myxococcales;Myxococcales_un;Myxococcales_un;                         |
| otu0388 | 1   | 0.02 | 1   | 0.02 | Bacteria;Proteobacteria;Deltaproteobacteria;Myxococcales;PS-B29;PS-B29_ge;                                        |
| otu0389 | 50  | 0.84 | 0   | 0    | Bacteria;Proteobacteria;Deltaproteobacteria;Myxococcales;Sandaracinaceae;uncultured;                              |
| otu0390 | 0   | 0    | 16  | 0.39 | Bacteria;Proteobacteria;Deltaproteobacteria;Myxococcales;Sandaracinaceae;uncultured;                              |
| otu0391 | 0   | 0    | 3   | 0.07 | Bacteria;Proteobacteria;Deltaproteobacteria;Myxococcales;UASB-TL25;UASB-TL25_ge;                                  |
| otu0392 | 0   | 0    | 1   | 0.02 | Bacteria;Proteobacteria;Deltaproteobacteria;Myxococcales;VHS-B4-70;VHS-B4-70_ge;                                  |
| otu0393 | 31  | 0.52 | 98  | 2.38 | Bacteria;Proteobacteria;Deltaproteobacteria;NB1-j;NB1-j_fa;NB1-j_ge;                                              |
| otu0394 | 2   | 0.03 | 0   | 0    | Bacteria;Proteobacteria;Deltaproteobacteria;NKB15;NKB15_fa;NKB15_ge;                                              |
| otu0395 | 0   | 0    | 1   | 0.02 | Bacteria;Proteobacteria;Deltaproteobacteria;Oligoflexales;0319-6G20;0319-6G20_ge;                                 |
| otu0396 | 0   | 0    | 5   | 0.12 | Bacteria;Proteobacteria;Deltaproteobacteria;Oligoflexales;Oligoflexaceae;uncultured;                              |

|         |      |      |      |      |                                                                                                                         |
|---------|------|------|------|------|-------------------------------------------------------------------------------------------------------------------------|
| otu0397 | 0    | 0    | 3    | 0.07 | Bacteria;Proteobacteria;Deltaproteobacteria;SAR324_clade(Marine_group_B);SAR324_clade(Marine_group_B)_fa;SAR324_clade(M |
| otu0398 | 22   | 0.37 | 0    | 0    | Bacteria;Proteobacteria;Deltaproteobacteria;Sva0485;Sva0485_fa;Sva0485_ge;                                              |
| otu0399 | 0    | 0    | 17   | 0.41 | Bacteria;Proteobacteria;Deltaproteobacteria;Sva0485;Sva0485_fa;Sva0485_ge;                                              |
| otu0400 | 0    | 0    | 1    | 0.02 | Bacteria;Proteobacteria;Deltaproteobacteria;Syntrophobacterales;Syntrophaceae;uncultured;                               |
| otu0401 | 40   | 0.67 | 49   | 1.19 | Bacteria;Proteobacteria;Deltaproteobacteria;Syntrophobacterales;Syntrophobacteraceae;uncultured;                        |
| otu0402 | 3    | 0.05 | 0    | 0    | Bacteria;Proteobacteria;Gammmaproteobacteria;Alteromonadales;Marinobacteraceae;Marinobacter;                            |
| otu0403 | 0    | 0    | 34   | 0.82 | Bacteria;Proteobacteria;Gammmaproteobacteria;Alteromonadales;Psychromonadaceae;Psychromonas;                            |
| otu0404 | 0    | 0    | 1    | 0.02 | Bacteria;Proteobacteria;Gammmaproteobacteria;Alteromonadales;Shewanellaceae;Ferrimonas;                                 |
| otu0405 | 67   | 1.13 | 0    | 0    | Bacteria;Proteobacteria;Gammmaproteobacteria;AT-s16;AT-s16_fa;AT-s16_ge;                                                |
| otu0406 | 3    | 0.05 | 54   | 1.31 | Bacteria;Proteobacteria;Gammmaproteobacteria;AT-s2-59;AT-s2-59_fa;AT-s2-59_ge;                                          |
| otu0407 | 0    | 0    | 26   | 0.63 | Bacteria;Proteobacteria;Gammmaproteobacteria;B2M28;B2M28_fa;B2M28_ge;                                                   |
| otu0408 | 6    | 0.1  | 2    | 0.05 | Bacteria;Proteobacteria;Gammmaproteobacteria;BD7-8;BD7-8_fa;BD7-8_ge;                                                   |
| otu0409 | 0    | 0    | 5    | 0.12 | Bacteria;Proteobacteria;Gammmaproteobacteria;Betaproteobacteriales;Nitrosomonadaceae;Nitrosomonadaceae_un;              |
| otu0410 | 0    | 0    | 10   | 0.24 | Bacteria;Proteobacteria;Gammmaproteobacteria;Cellvibrionales;Cellvibrionales_un;Cellvibrionales_un;                     |
| otu0411 | 0    | 0    | 7    | 0.17 | Bacteria;Proteobacteria;Gammmaproteobacteria;Cellvibrionales;Haliaceae;Haliaceae_un;                                    |
| otu0412 | 0    | 0    | 5    | 0.12 | Bacteria;Proteobacteria;Gammmaproteobacteria;Cellvibrionales;Haliaceae;Halioglobus;                                     |
| otu0413 | 0    | 0    | 2    | 0.05 | Bacteria;Proteobacteria;Gammmaproteobacteria;Cellvibrionales;Haliaceae;OM60(NOR5)_clade;                                |
| otu0414 | 0    | 0    | 2    | 0.05 | Bacteria;Proteobacteria;Gammmaproteobacteria;Cellvibrionales;Haliaceae;Parahalia;                                       |
| otu0415 | 0    | 0    | 2    | 0.05 | Bacteria;Proteobacteria;Gammmaproteobacteria;Cellvibrionales;Microbulbiferaceae;Microbulbifer;                          |
| otu0416 | 0    | 0    | 2    | 0.05 | Bacteria;Proteobacteria;Gammmaproteobacteria;Cellvibrionales;Spongiibacteraceae;BD1-7_clade;                            |
| otu0417 | 0    | 0    | 3    | 0.07 | Bacteria;Proteobacteria;Gammmaproteobacteria;Chromatiales;Sedimenticolaceae;Sedimenticolaceae_un;                       |
| otu0418 | 1    | 0.02 | 34   | 0.82 | Bacteria;Proteobacteria;Gammmaproteobacteria;Coxiellales;Coxiellaceae;Coxiella;                                         |
| otu0419 | 0    | 0    | 3    | 0.07 | Bacteria;Proteobacteria;Gammmaproteobacteria;EC3;EC3_fa;EC3_ge;                                                         |
| otu0420 | 0    | 0    | 3    | 0.07 | Bacteria;Proteobacteria;Gammmaproteobacteria;Ectothiorhodospirales;Ectothiorhodospiraceae;Thiogranum;                   |
| otu0421 | 0    | 0    | 5    | 0.12 | Bacteria;Proteobacteria;Gammmaproteobacteria;Ectothiorhodospirales;Thioalkalispiraceae;SS1-B-09-64;                     |
| otu0422 | 1    | 0.02 | 7    | 0.17 | Bacteria;Proteobacteria;Gammmaproteobacteria;EPR3968-O8a-Bc78;EPR3968-O8a-Bc78_fa;EPR3968-O8a-Bc78_ge;                  |
| otu0423 | 0    | 0    | 4    | 0.1  | Bacteria;Proteobacteria;Gammmaproteobacteria;EV818SWSAP88;EV818SWSAP88_fa;EV818SWSAP88_ge;                              |
| otu0424 | 0    | 0    | 2    | 0.05 | Bacteria;Proteobacteria;Gammmaproteobacteria;Gammmaproteobacteria_Incertae_Sedis;Unknown_Family;Candidatus_Berkiella;   |
| otu0425 | 0    | 0    | 42   | 1.02 | Bacteria;Proteobacteria;Gammmaproteobacteria;Gammmaproteobacteria_Incertae_Sedis;Unknown_Family;uncultured;             |
| otu0426 | 0    | 0    | 2    | 0.05 | Bacteria;Proteobacteria;Gammmaproteobacteria;Gammmaproteobacteria_Incertae_Sedis;Unknown_Family;Unknown_Family_ge;      |
| otu0427 | 53   | 0.89 | 268  | 6.5  | Bacteria;Proteobacteria;Gammmaproteobacteria;Gammmaproteobacteria_un;Gammmaproteobacteria_un;Gammmaproteobacteria_un;   |
| otu0428 | 1    | 0.02 | 37   | 0.9  | Bacteria;Proteobacteria;Gammmaproteobacteria;KI89A_clade;KI89A_clade_fa;KI89A_clade_ge;                                 |
| otu0429 | 1    | 0.02 | 3    | 0.07 | Bacteria;Proteobacteria;Gammmaproteobacteria;Legionellales;Legionellaceae;Legionella;                                   |
| otu0430 | 0    | 0    | 3    | 0.07 | Bacteria;Proteobacteria;Gammmaproteobacteria;Legionellales;Legionellaceae;Legionellaceae_un;                            |
| otu0431 | 0    | 0    | 4    | 0.1  | Bacteria;Proteobacteria;Gammmaproteobacteria;Legionellales;Legionellaceae;uncultured;                                   |
| otu0432 | 1    | 0.02 | 0    | 0    | Bacteria;Proteobacteria;Gammmaproteobacteria;MBAE14;MBAE14_fa;MBAE14_ge;                                                |
| otu0433 | 7    | 0.12 | 11   | 0.27 | Bacteria;Proteobacteria;Gammmaproteobacteria;Nitrosococcales;Nitrosococcaceae;AqS1;                                     |
| otu0434 | 0    | 0    | 2    | 0.05 | Bacteria;Proteobacteria;Gammmaproteobacteria;Nitrosococcales;Nitrosococcaceae;Cm1-21;                                   |
| otu0435 | 0    | 0    | 2    | 0.05 | Bacteria;Proteobacteria;Gammmaproteobacteria;Nitrosococcales;Nitrosococcaceae;FS142-36B-02;                             |
| otu0436 | 0    | 0    | 1    | 0.02 | Bacteria;Proteobacteria;Gammmaproteobacteria;Nitrosococcales;Nitrosococcaceae;MSB-1D1;                                  |
| otu0437 | 1    | 0.02 | 12   | 0.29 | Bacteria;Proteobacteria;Gammmaproteobacteria;Nitrosococcales;Nitrosococcaceae;Nitrosococcaceae_un;                      |
| otu0438 | 227  | 3.82 | 0    | 0    | Bacteria;Proteobacteria;Gammmaproteobacteria;Oceanospirillales;Alcanivoraceae;Alcanivorax;                              |
| otu0439 | 1    | 0.02 | 0    | 0    | Bacteria;Proteobacteria;Gammmaproteobacteria;Oceanospirillales;Halomonadaceae;Salinicola;                               |
| otu0440 | 536  | 9.02 | 0    | 0    | Bacteria;Proteobacteria;Gammmaproteobacteria;Oceanospirillales;Nitrincolaceae;Amphritea;                                |
| otu0441 | 0    | 0    | 1    | 0.02 | Bacteria;Proteobacteria;Gammmaproteobacteria;Oceanospirillales;Nitrincolaceae;Neptuniibacter;                           |
| otu0442 | 0    | 0    | 1    | 0.02 | Bacteria;Proteobacteria;Gammmaproteobacteria;Oceanospirillales;P13-46;P13-46_ge;                                        |
| otu0443 | 0    | 0    | 1    | 0.02 | Bacteria;Proteobacteria;Gammmaproteobacteria;Oceanospirillales;Pseudohongiellaceae;Pseudohongiella;                     |
| otu0444 | 3    | 0.05 | 6    | 0.15 | Bacteria;Proteobacteria;Gammmaproteobacteria;P0X4b2H11;P0X4b2H11_fa;P0X4b2H11_ge;                                       |
| otu0445 | 0    | 0    | 17   | 0.41 | Bacteria;Proteobacteria;Gammmaproteobacteria;Pltb-vmat-80;pltb-vmat-80_fa;pltb-vmat-80_ge;                              |
| otu0446 | 0    | 0    | 3    | 0.07 | Bacteria;Proteobacteria;Gammmaproteobacteria;Steroidobacterales;Woeseiaceae;JTB255_marine_benthic_group;                |
| otu0447 | 13   | 0.22 | 288  | 6.98 | Bacteria;Proteobacteria;Gammmaproteobacteria;Steroidobacterales;Woeseiaceae;Woeseia;                                    |
| otu0448 | 0    | 0    | 1    | 0.02 | Bacteria;Proteobacteria;Gammmaproteobacteria;Thiohalorhabdadales;Thiohalorhabdaceae;uncultured;                         |
| otu0449 | 0    | 0    | 13   | 0.32 | Bacteria;Proteobacteria;Gammmaproteobacteria;UBA10353_marine_group;UBA10353_marine_group_fa;UBA10353_marine_group_g     |
| otu0450 | 1    | 0.02 | 45   | 1.09 | Bacteria;Proteobacteria;Gammmaproteobacteria;uncultured;uncultured_fa;uncultured_ge;                                    |
| otu0451 | 164  | 2.76 | 0    | 0    | Bacteria;Proteobacteria;Gammmaproteobacteria;Vibrionales;Vibrionaceae;Photobacterium;                                   |
| otu0452 | 0    | 0    | 1    | 0.02 | Bacteria;Proteobacteria;Gammmaproteobacteria;Vibrionales;Vibrionaceae;Vibrionaceae_un;                                  |
| otu0453 | 11   | 0.19 | 29   | 0.7  | Bacteria;Proteobacteria;Proteobacteria_un;Proteobacteria_un;Proteobacteria_un;Proteobacteria_un;                        |
|         | 1937 | 32.6 | 2172 | 52.7 |                                                                                                                         |
| otu0454 | 1    | 0.02 | 4    | 0.1  | Bacteria;Schekmanbacteria;Schekmanbacteria_cl;Schekmanbacteria_or;Schekmanbacteria_fa;Schekmanbacteria_ge;              |
|         | 1    | 0.02 | 4    | 0.1  |                                                                                                                         |
| otu0455 | 0    | 0    | 1    | 0.02 | Bacteria;Spirochaetes;Leptospirae;Leptospirales;Leptospiraceae;uncultured;                                              |
| otu0456 | 12   | 0.2  | 0    | 0    | Bacteria;Spirochaetes;Spirochaetia;Spirochaetales;Spirochaetaceae;Spirochaeta_2;                                        |
| otu0457 | 1    | 0.02 | 1    | 0.02 | Bacteria;Spirochaetes;Spirochaetia;Spirochaetales;Spirochaetaceae;uncultured;                                           |
|         | 13   | 0.22 | 2    | 0.05 |                                                                                                                         |
| otu0458 | 17   | 0.29 | 1    | 0.02 | Bacteria;TA06;TA06_cl;TA06_or;TA06_fa;TA06_ge;                                                                          |
|         | 17   | 0.29 | 1    | 0.02 |                                                                                                                         |
| otu0459 | 1    | 0.02 | 5    | 0.12 | Bacteria;Tenericutes;Mollicutes;Haloplasmatales;Haloplasmataceae;Haloplasma;                                            |
| otu0460 | 1    | 0.02 | 5    | 0.12 | Bacteria;Tenericutes;Mollicutes;Izimaplasmatales;Izimaplasmatales_fa;Izimaplasmatales_ge;                               |
|         | 2    | 0.03 | 10   | 0.24 |                                                                                                                         |
| otu0461 | 0    | 0    | 1    | 0.02 | Bacteria;Verrucomicrobia;Verrucomicrobiae;Opitutales;Puniceicoccaceae;Cerasicoccus;                                     |
| otu0462 | 0    | 0    | 1    | 0.02 | Bacteria;Verrucomicrobia;Verrucomicrobiae;Opitutales;Puniceicoccaceae;Verruc-01;                                        |
| otu0463 | 0    | 0    | 1    | 0.02 | Bacteria;Verrucomicrobia;Verrucomicrobiae;Verrucomicrobiales;Rubritaleaceae;Persicirhabdus;                             |

|         |   |      |   |      |                                                                                                 |
|---------|---|------|---|------|-------------------------------------------------------------------------------------------------|
|         | 0 | 0    | 3 | 0.07 |                                                                                                 |
| otu0464 | 0 | 0    | 1 | 0.02 | Bacteria; <b>WS1</b> ;WS1_cl;WS1_or;WS1_fa;WS1_ge;                                              |
|         | 0 | 0    | 1 | 0.02 |                                                                                                 |
| otu0465 | 0 | 0    | 2 | 0.05 | Bacteria; <b>WS2</b> ;WS2_cl;WS2_or;WS2_fa;WS2_ge;                                              |
|         | 0 | 0    | 2 | 0.05 |                                                                                                 |
| otu0466 | 4 | 0.07 | 2 | 0.05 | Bacteria; <b>Zixibacteria</b> ;Zixibacteria_cl;Zixibacteria_or;Zixibacteria_fa;Zixibacteria_ge; |
|         | 4 | 0.07 | 2 | 0.05 |                                                                                                 |
| otu0467 | 1 | 0.02 | 1 | 0.02 | unknown; <b>unknown_un</b> ;unknown_un;unknown_un;unknown_un;unknown_un;                        |
|         | 1 | 0.02 | 1 | 0.02 |                                                                                                 |
